# Supplementary material for: Acid Ceramidase Inhibition Disrupts Ceramide Homeostasis and Induces Mitochondrial Apoptosis in IDH1-Mutant Oligodendroglioma
Source: Research Square preprint supplement (doi:10.21203/rs.3.rs-9077389/v1), 2026-03-25

**Original western blots**

**Standard 🡪** Precision Plus Protein Dual Color Standards (1610374 Bio-Rad) 🡪 From top to bottom (250, 150, 100, 75, 50, 37, 25, 20, 15, 10 kDa)

**Figure 1E**

**Anti-AC (40kDa) Anti-α-tubulin (52kDa)**

**
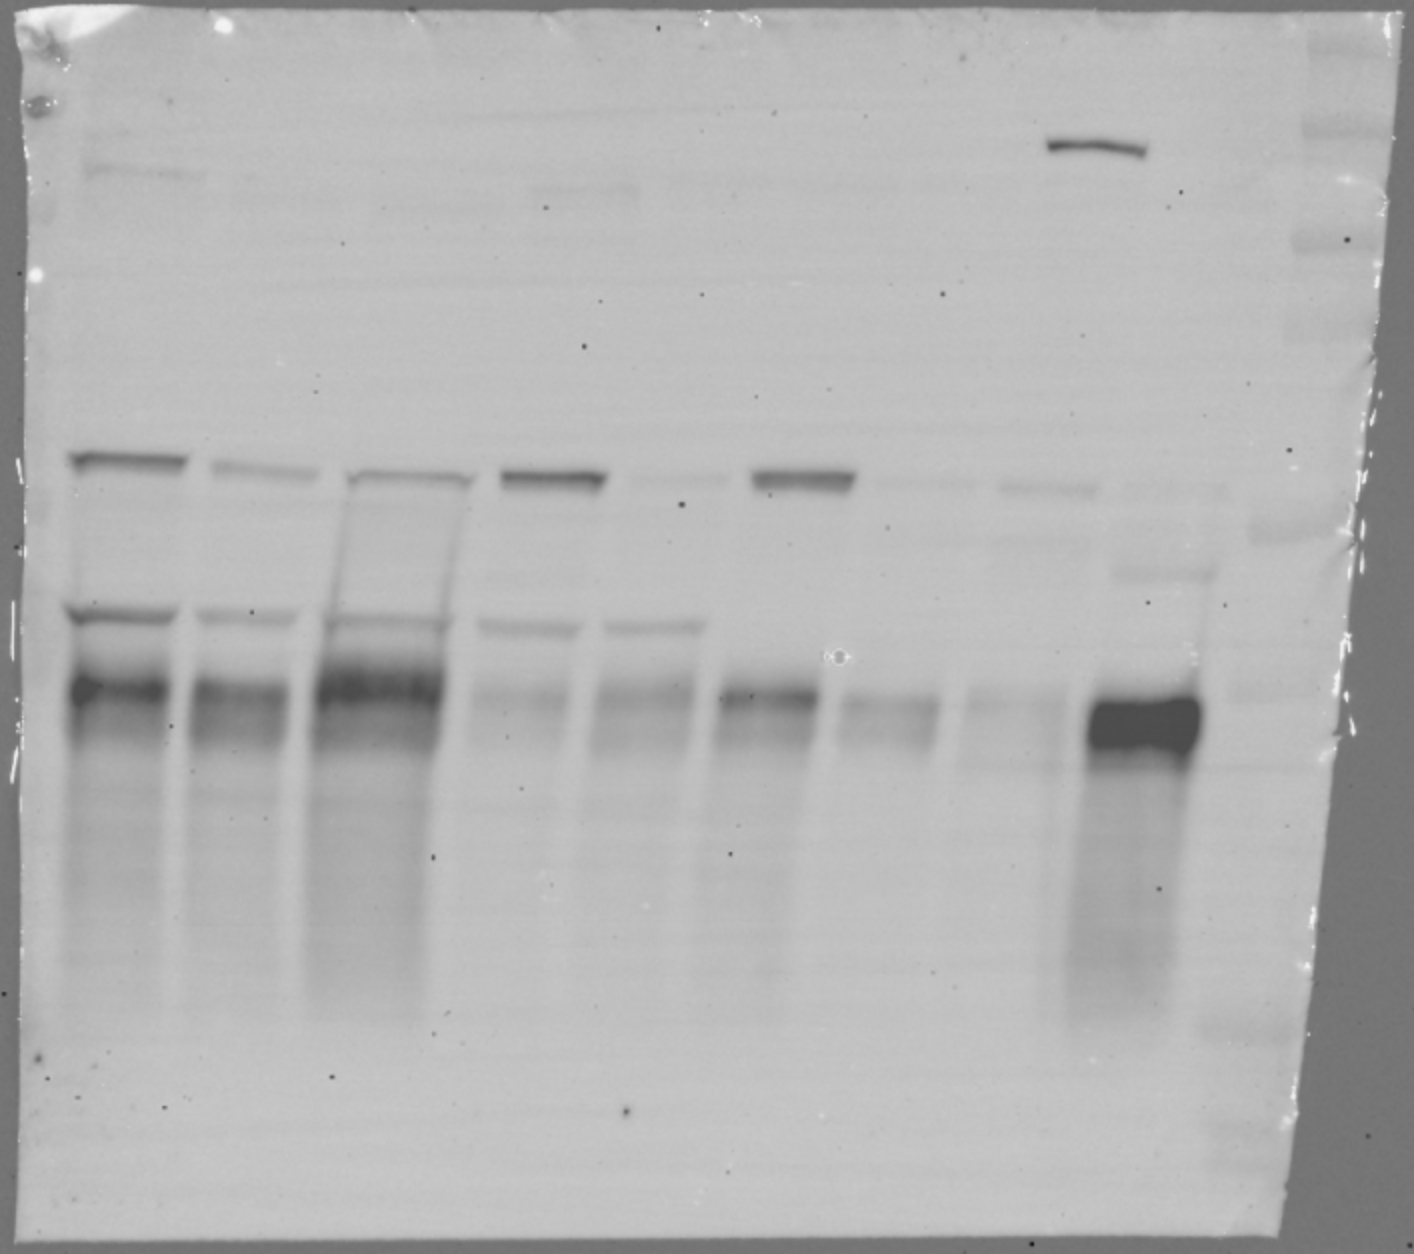

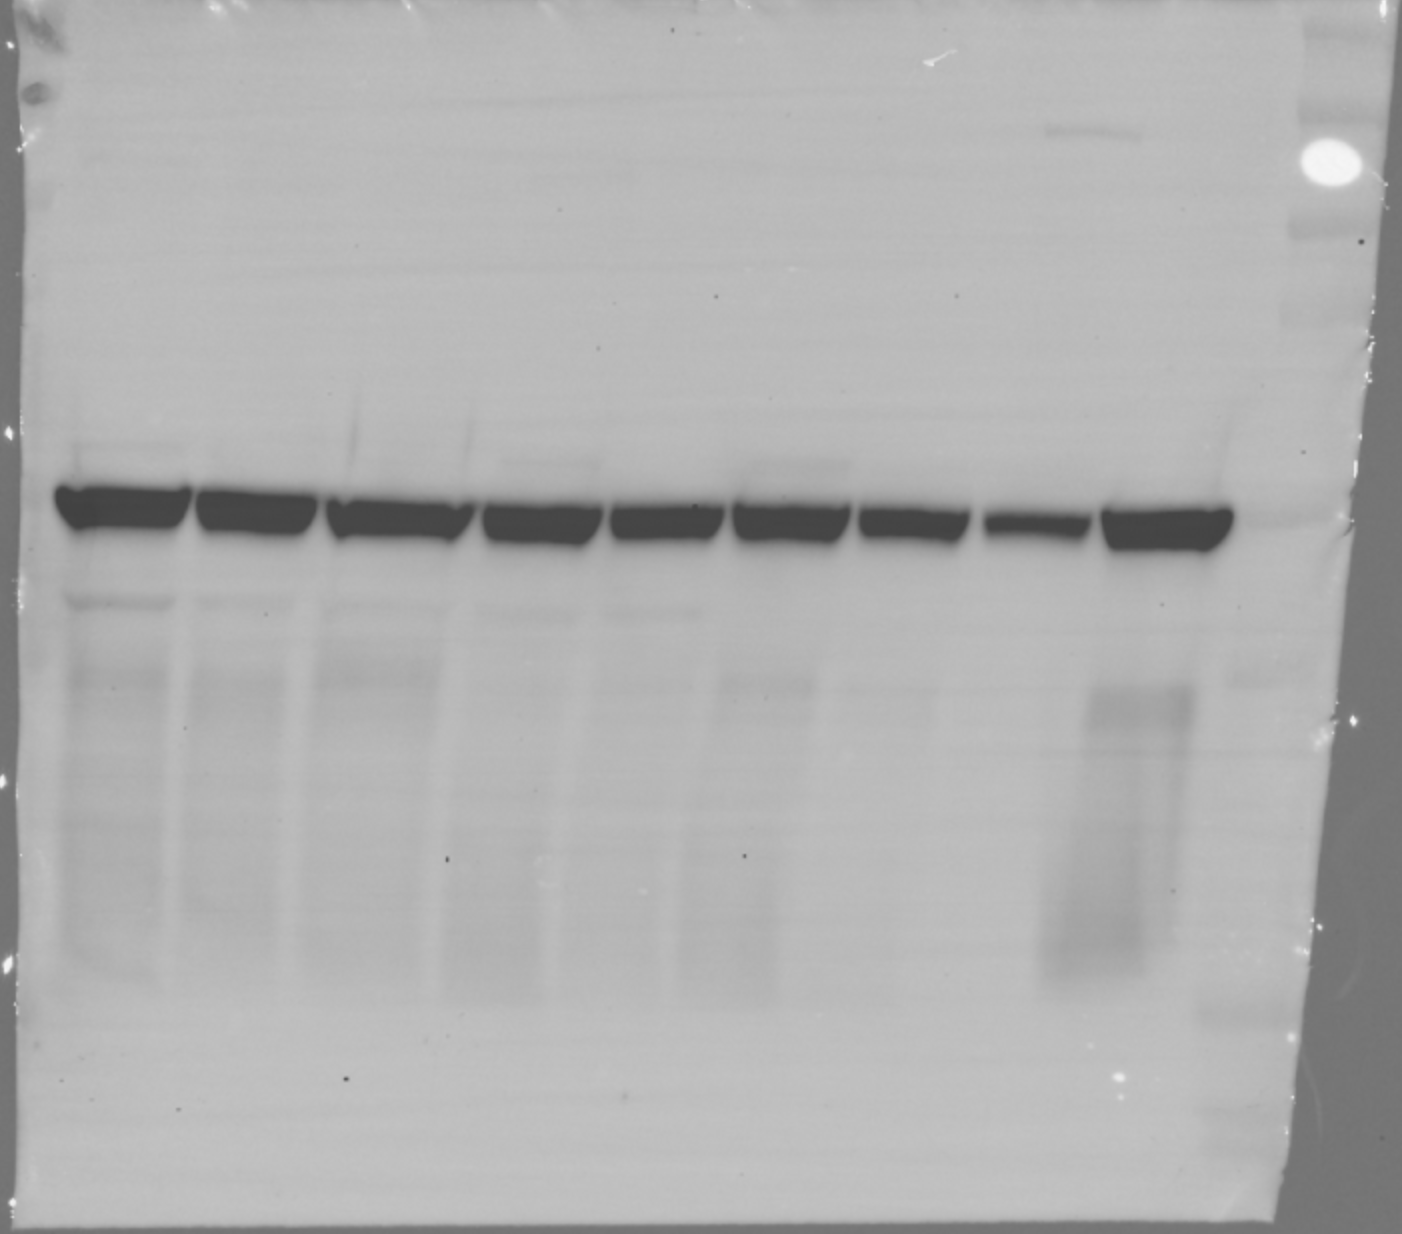
**

**Figure 2E**

**Anti-AC (40kDa) Anti-β-actin (42kDa)**


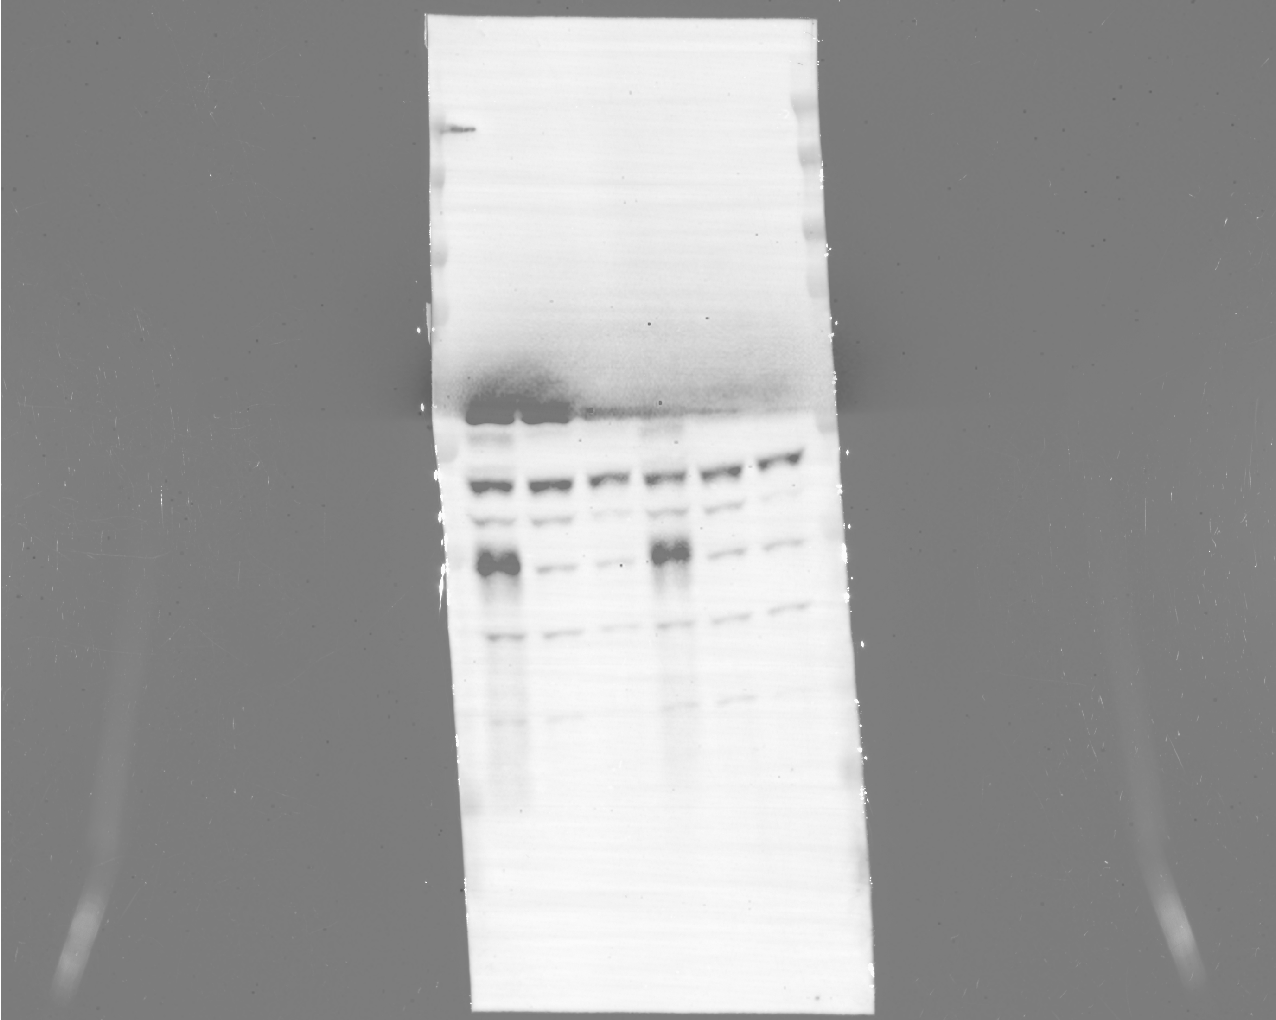

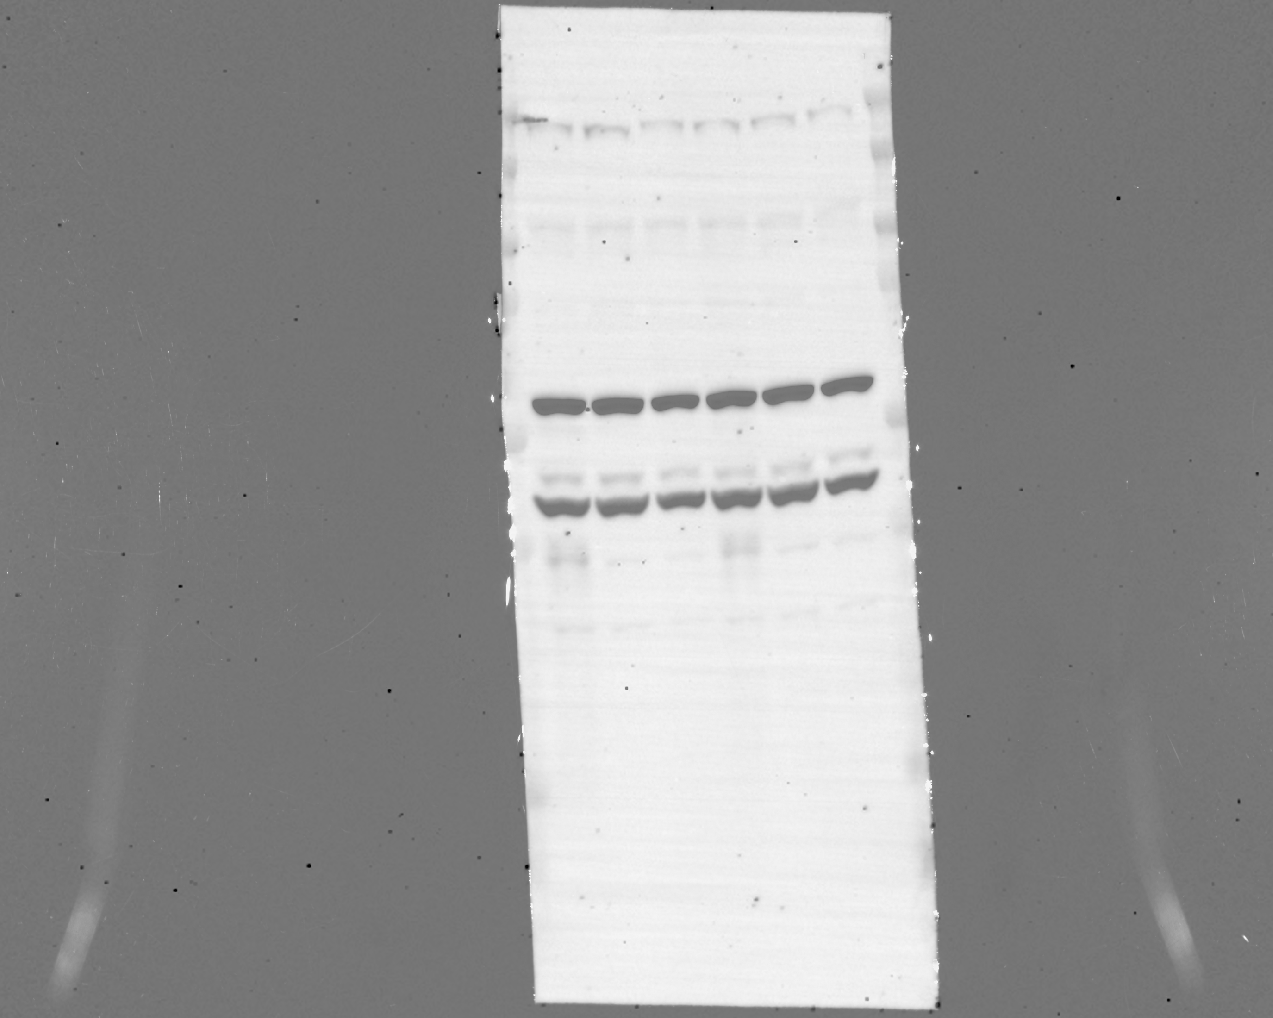


**Figure 3C**

**Anti-Cytochrome c (14kDa)** **Anti-β-actin (42kDa)**


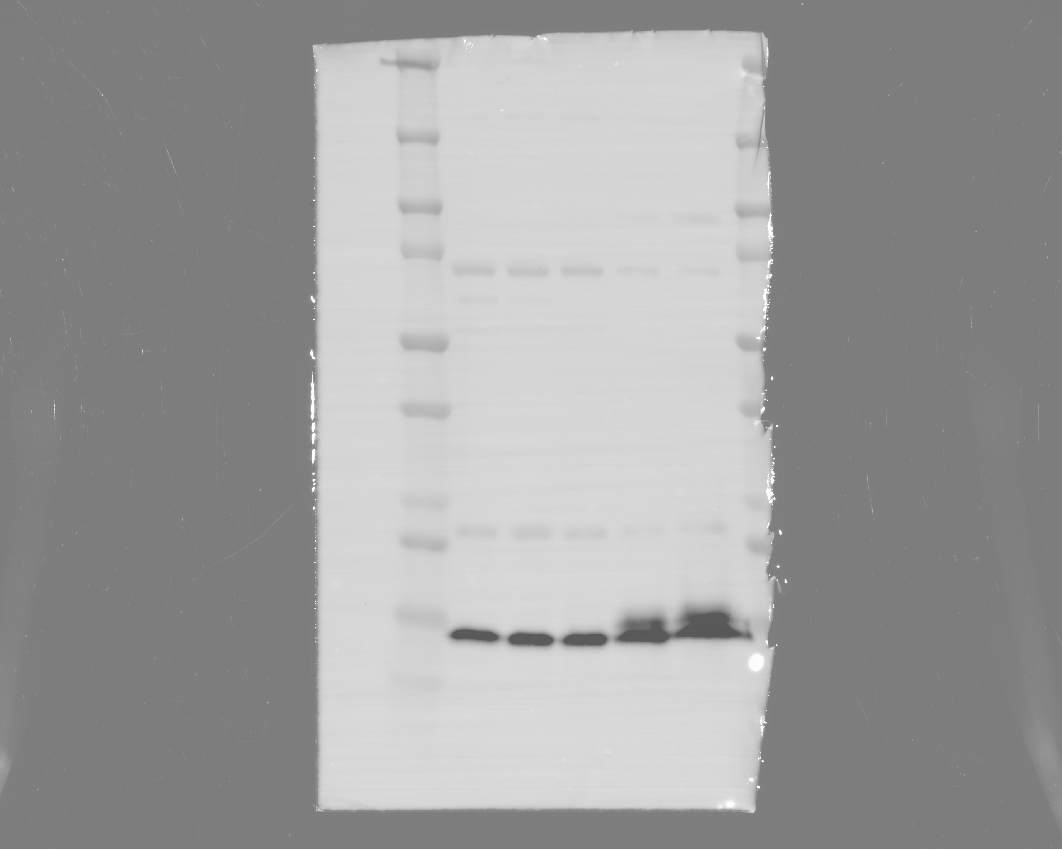

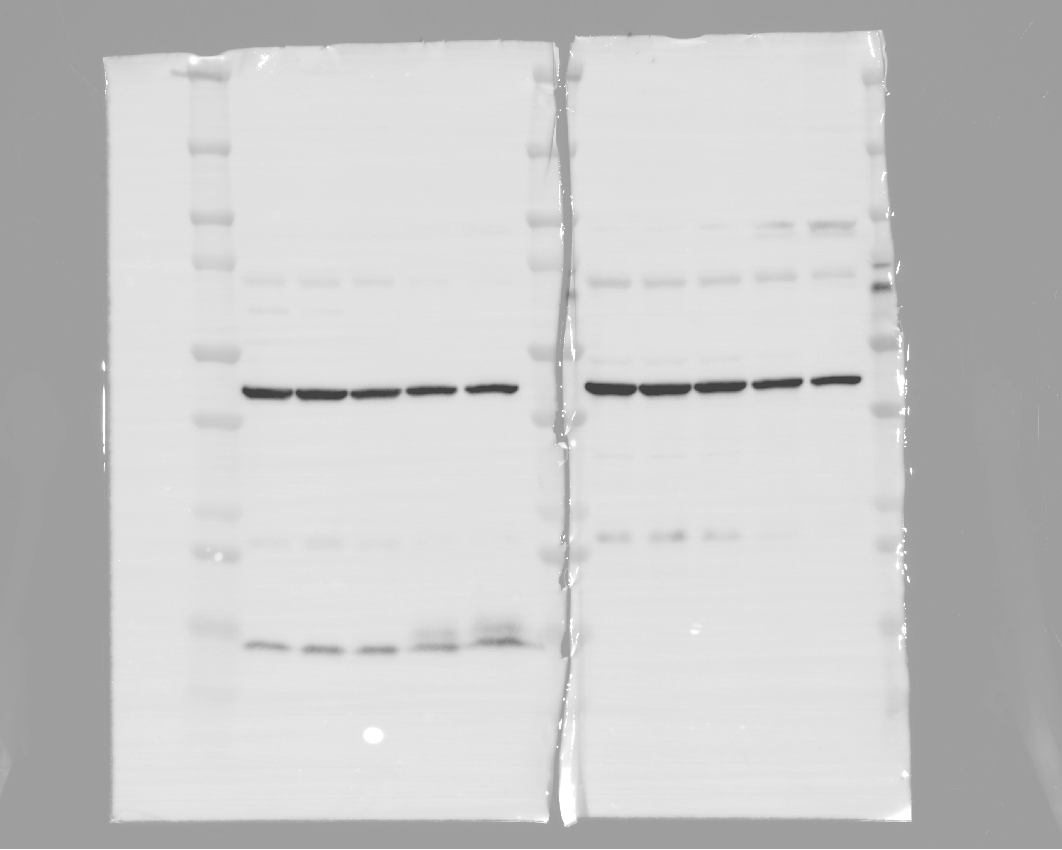


**Figure 3D**

**Anti-BAX and anti-Cleaved-BAX (20-18kDa)** **Anti-β-actin (42kDa)**


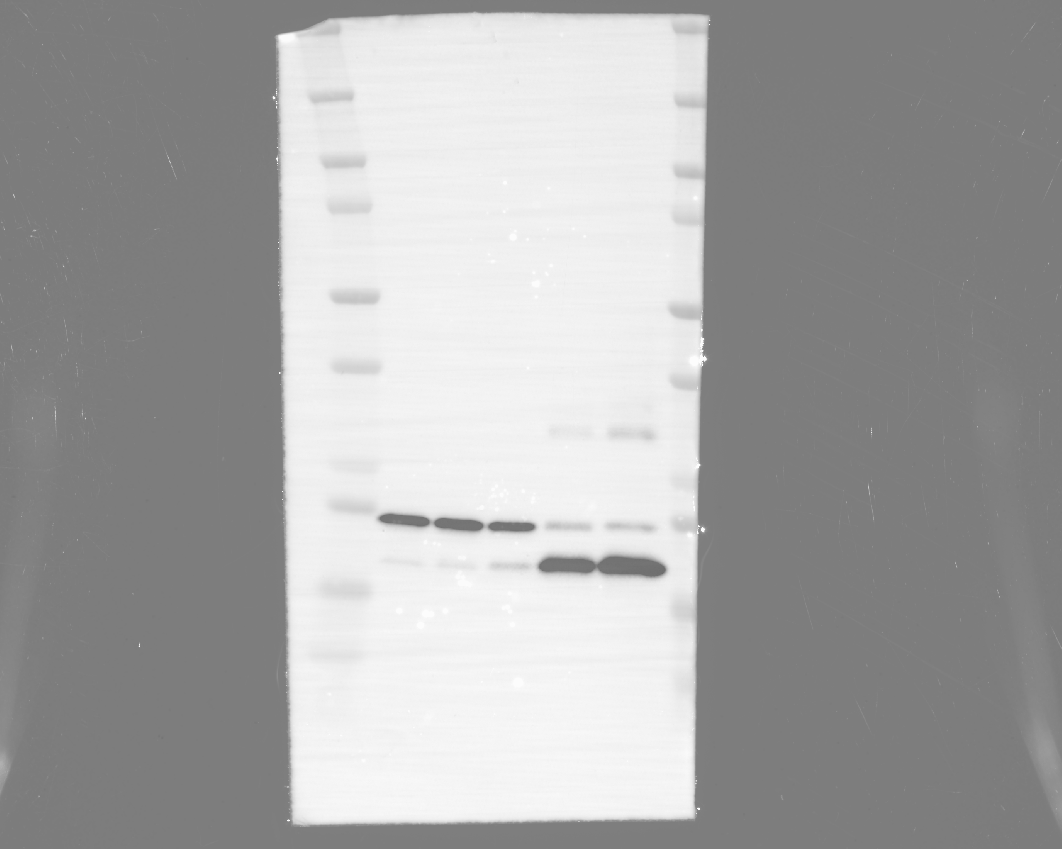

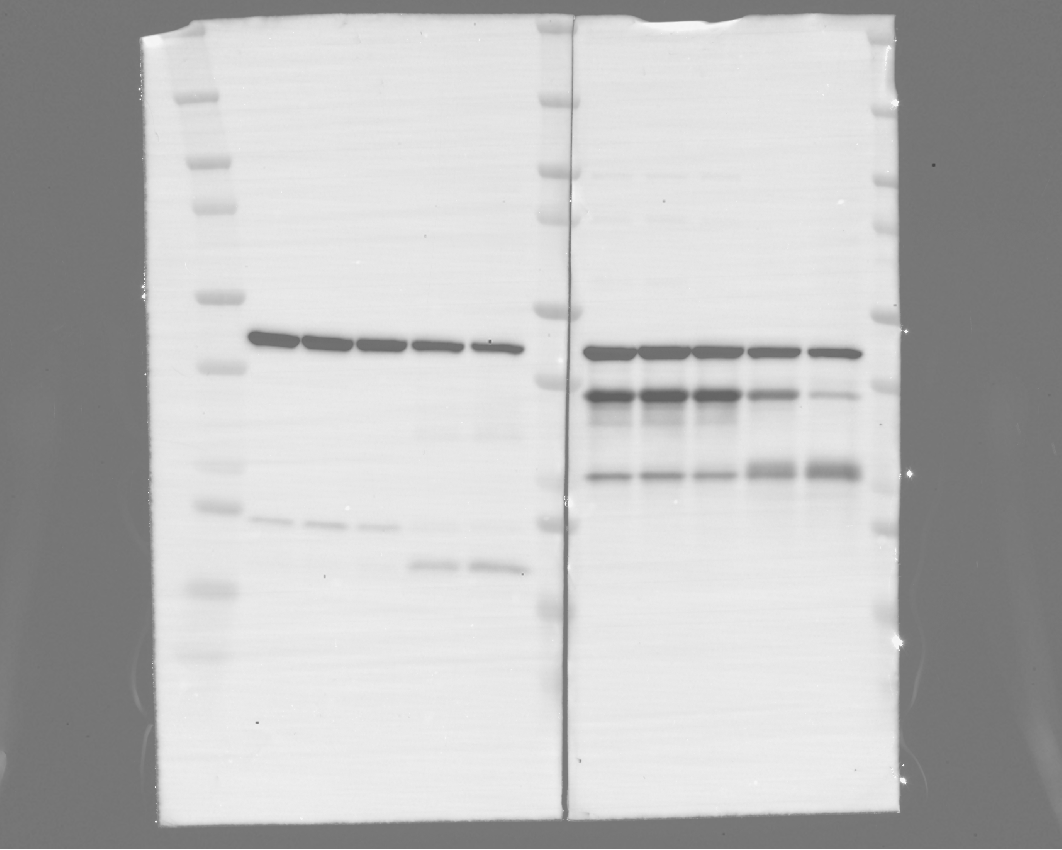


**Figure 3D**

**Anti-BCL-2 (28kDa)** **Anti-β-actin (42kDa)**


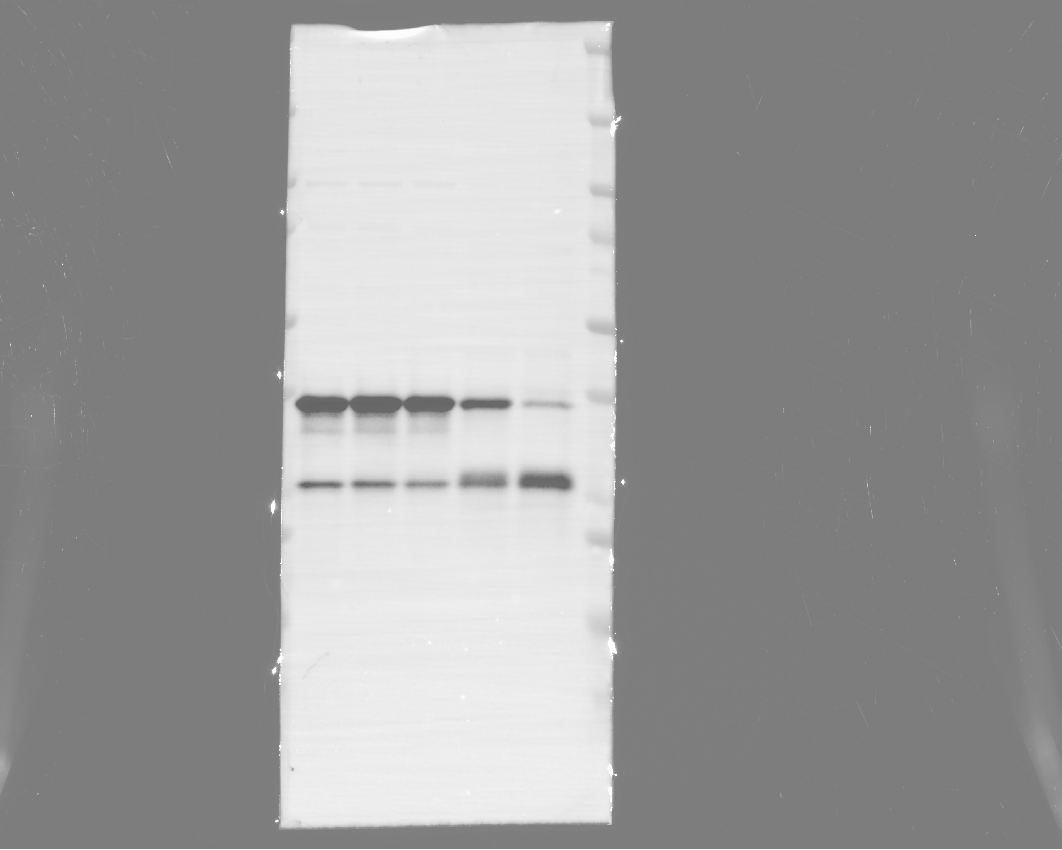

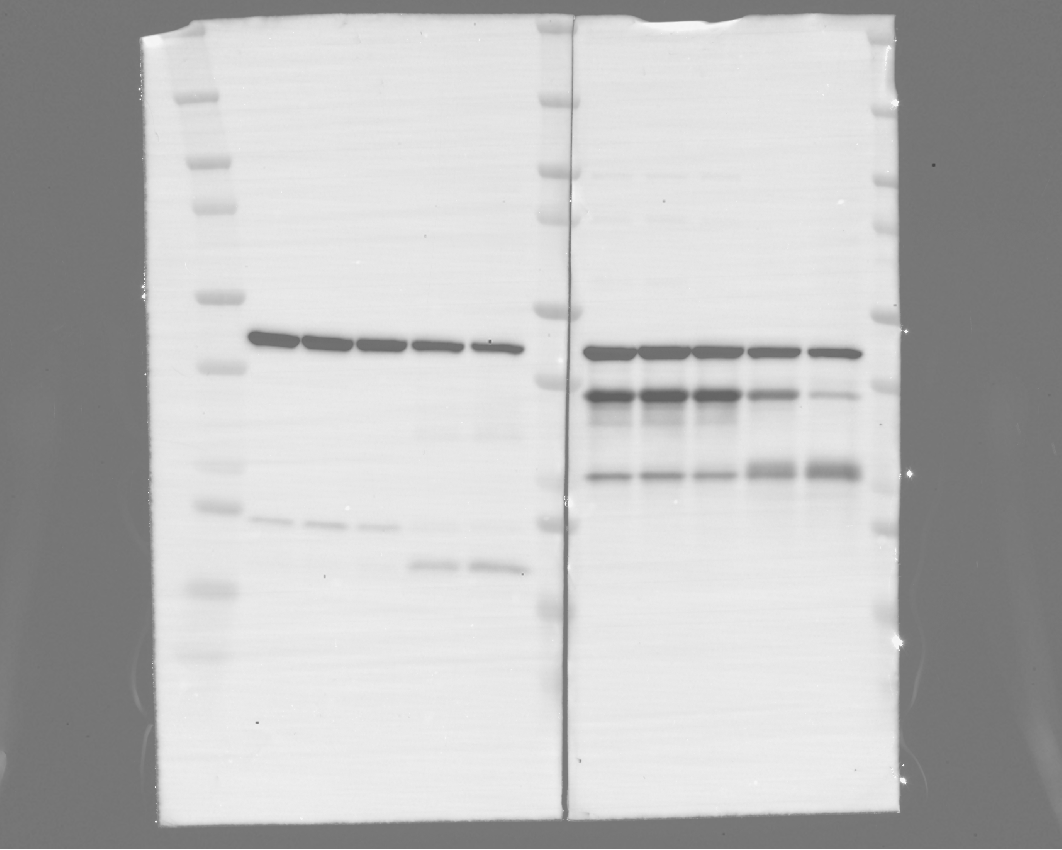


**Figure 3E**

**Anti-Pro-Caspase 3 and anti-Caspase 3 (35-17/19kDa)** **Anti-β-actin (42kDa)**


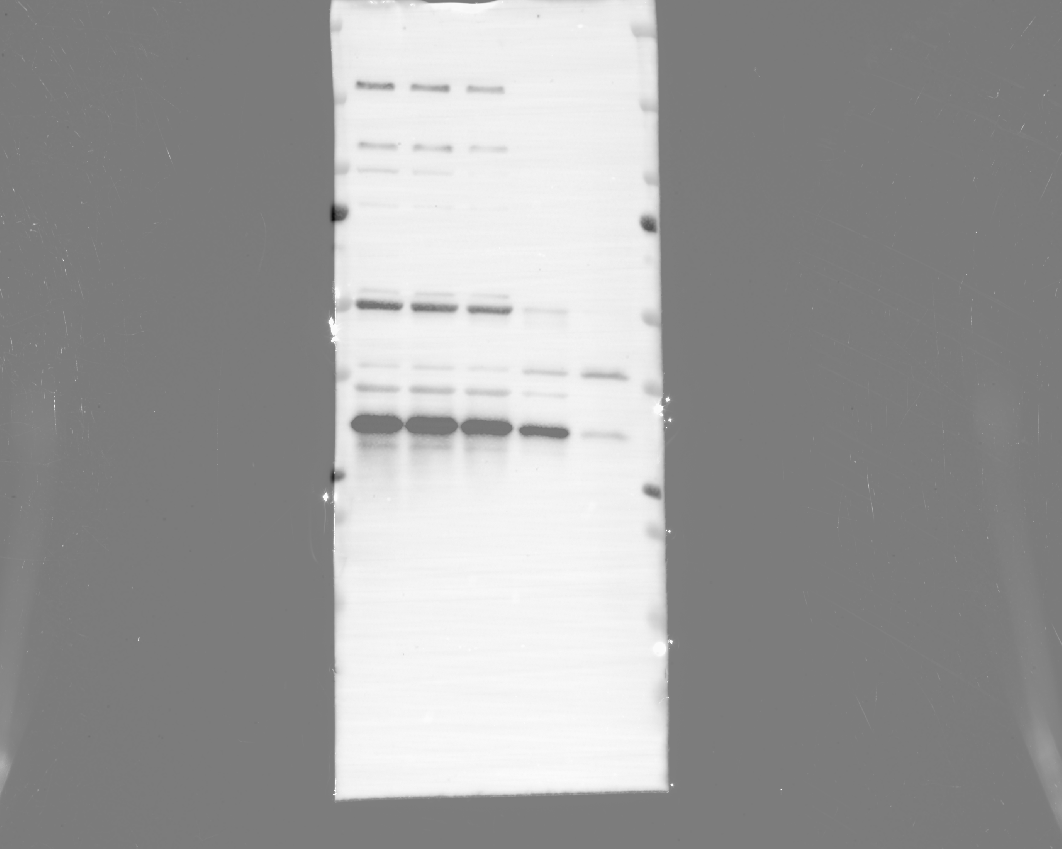

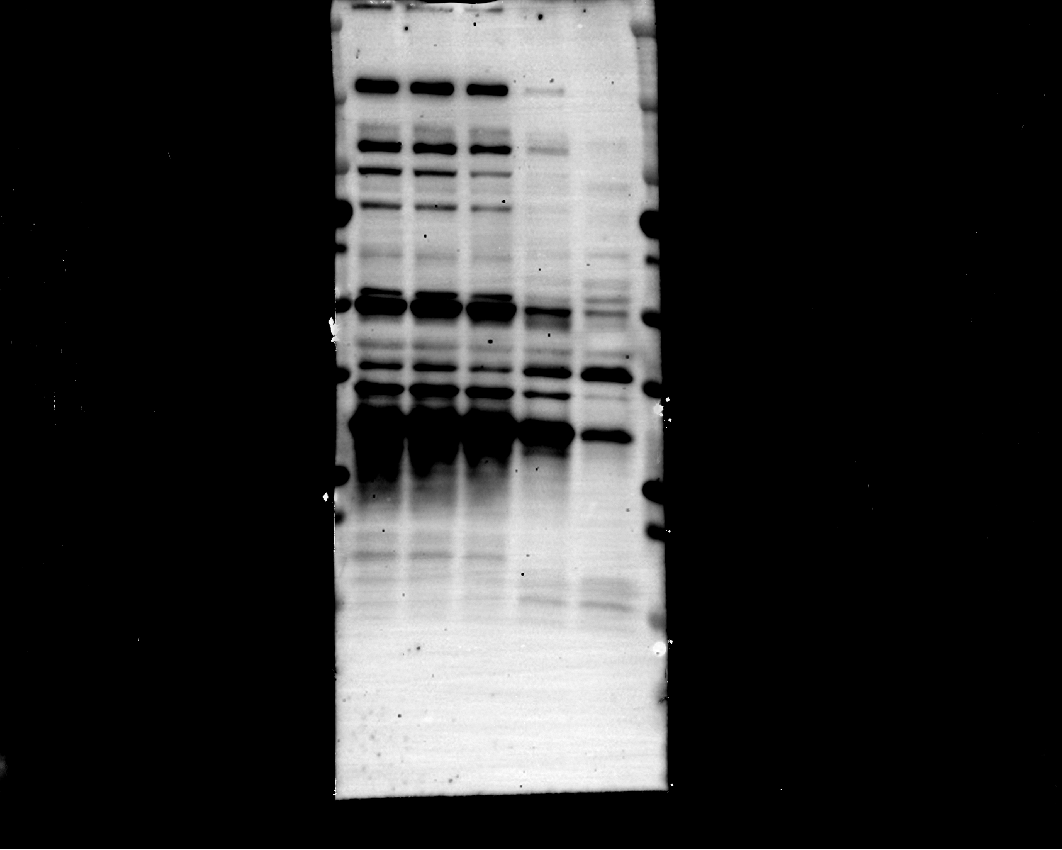

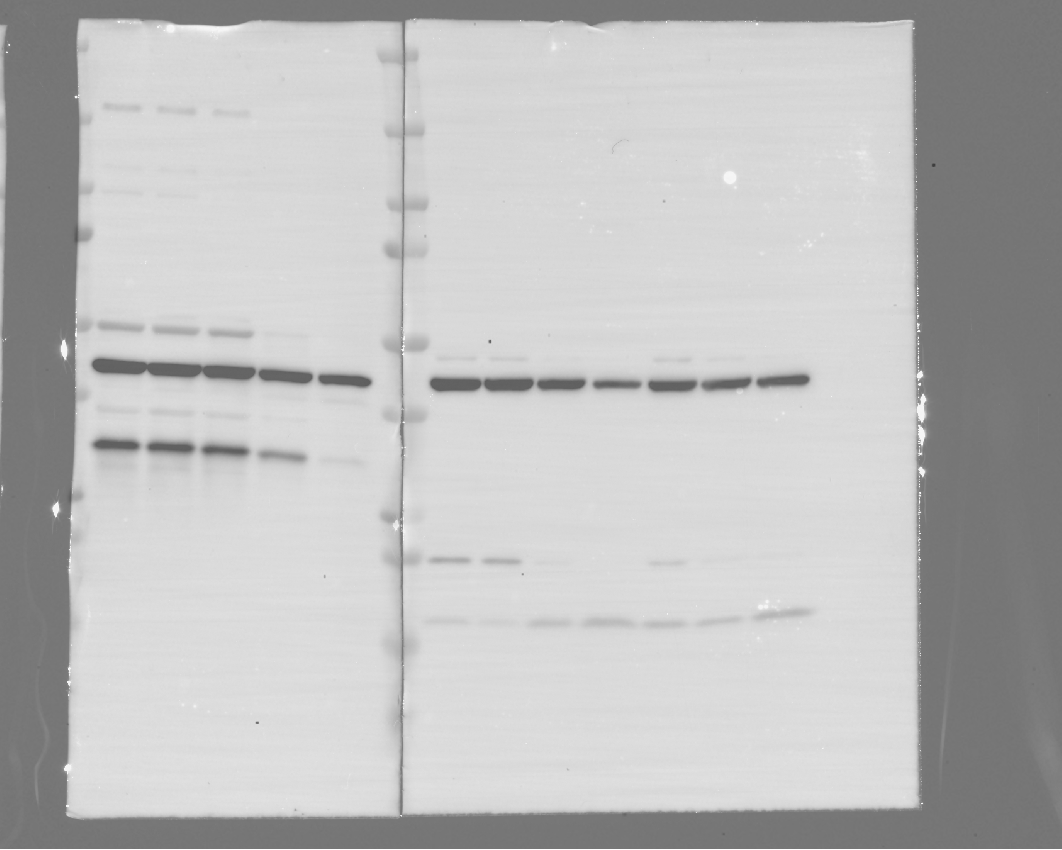


**Figure 3E**

**Anti-Cleaved PARP1 (25kDa)** **Anti-α-tubulin (52kDa)**

**
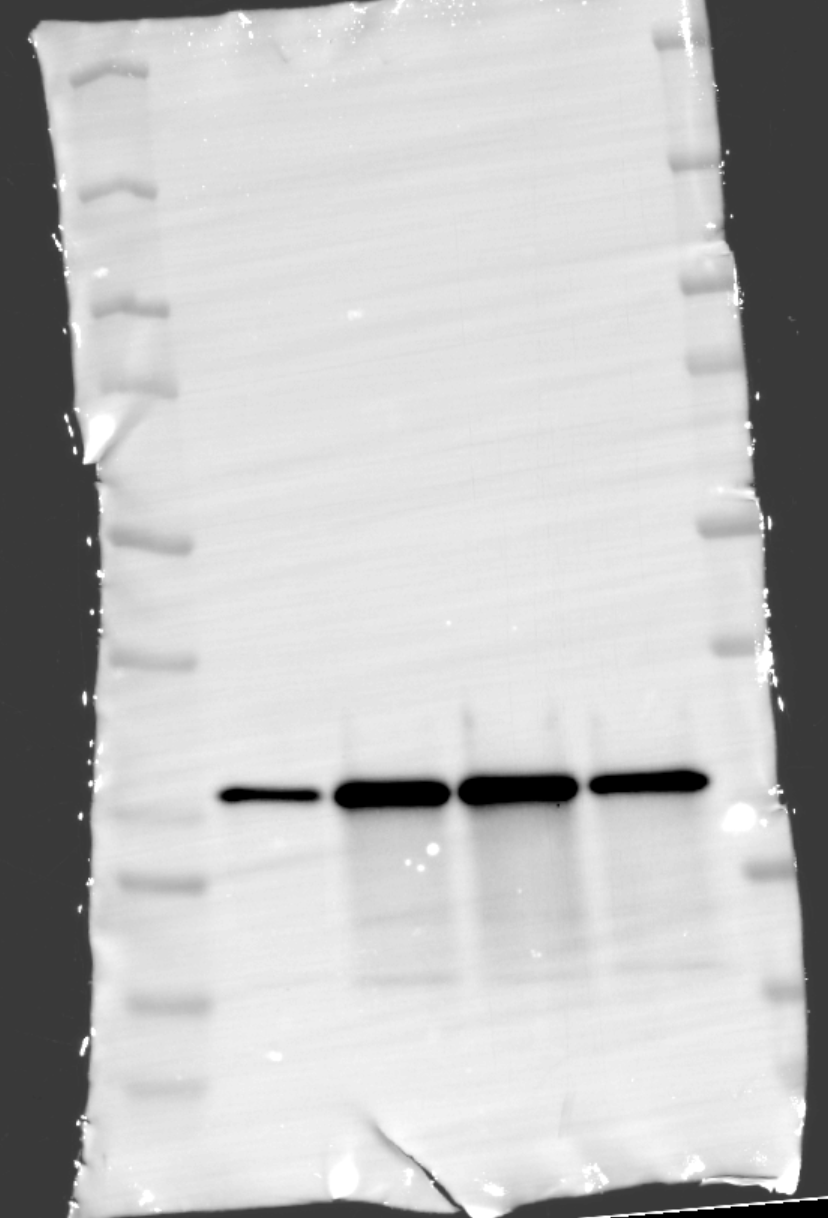
** **
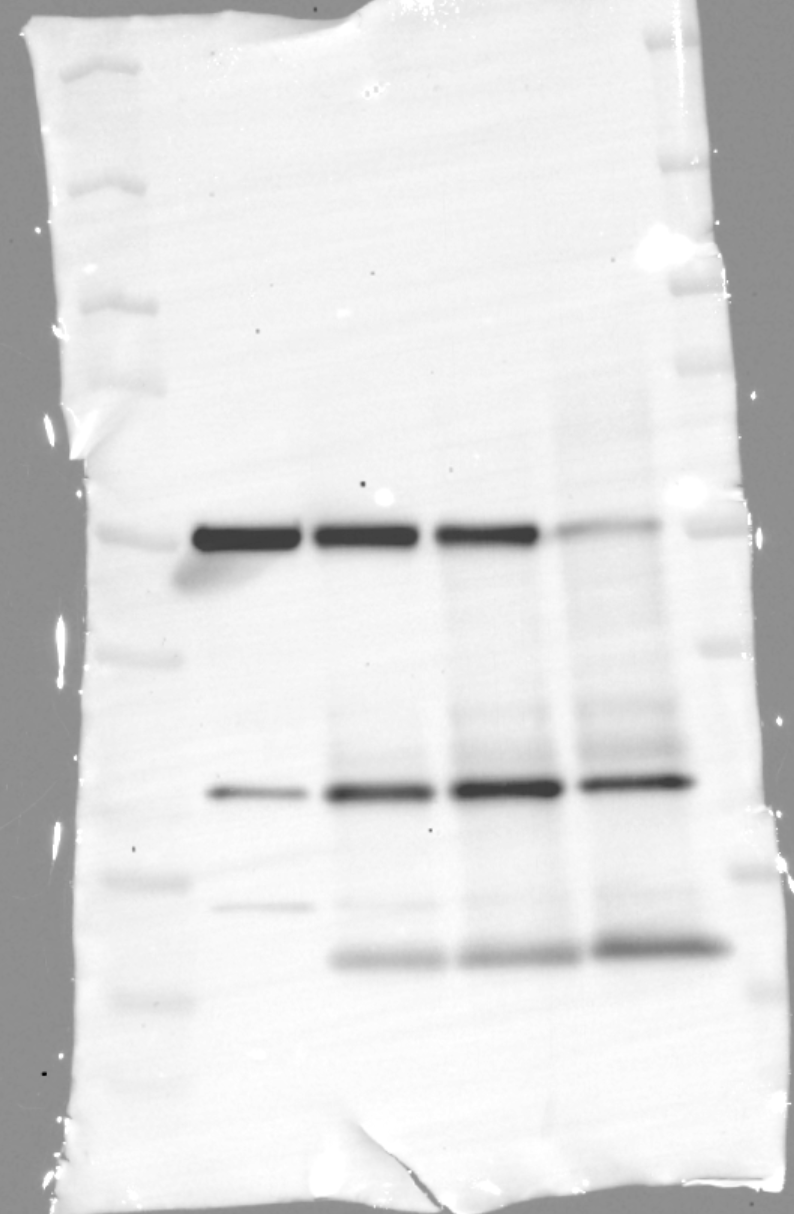
**

**Figure 4E and F**

**Anti-PERK (140kDa) Anti-CHOP (30kDa) Anti-β-actin (42kDa)**

**
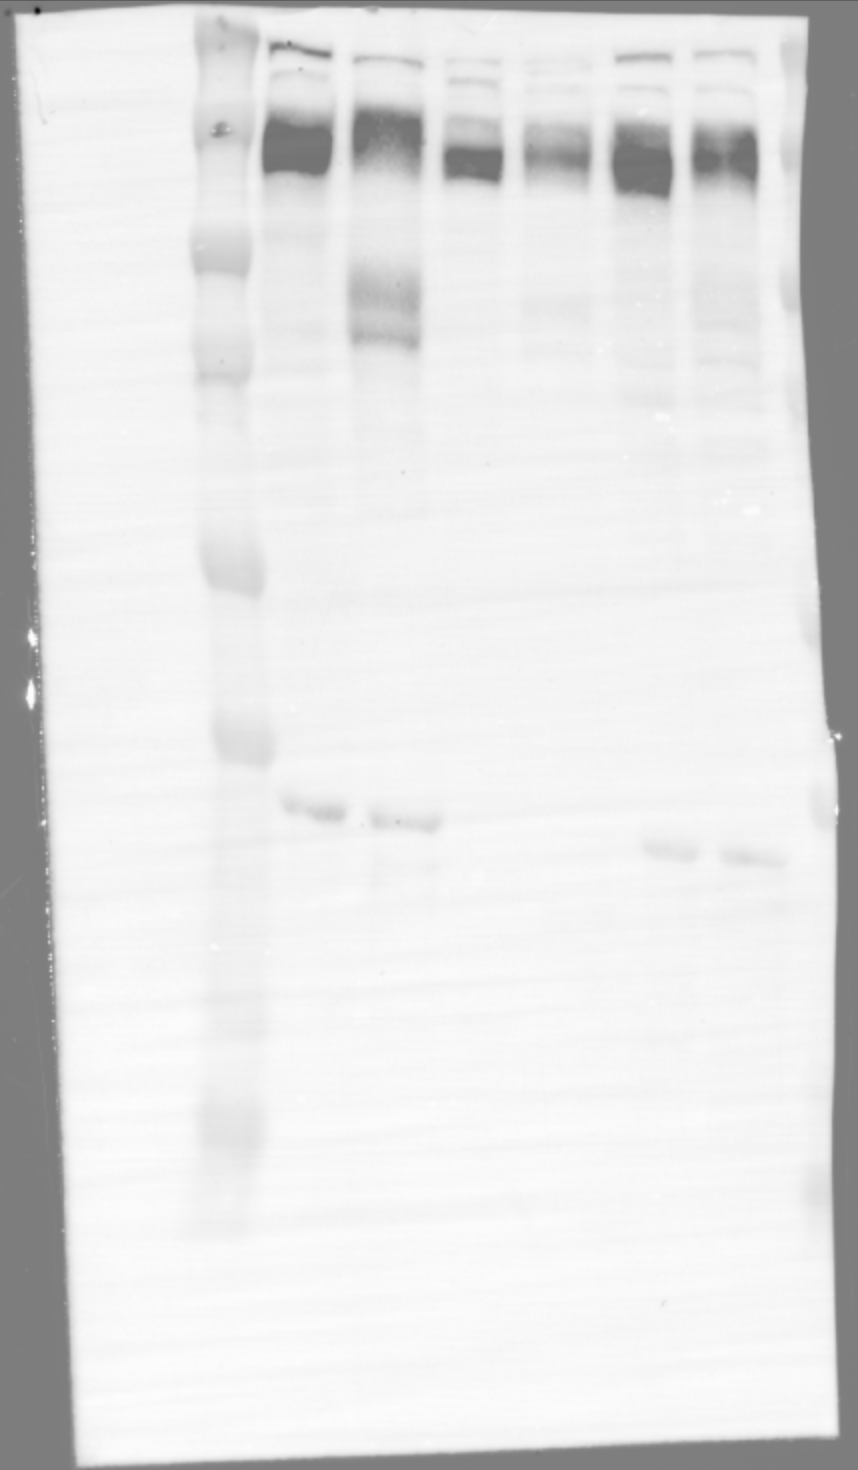
**
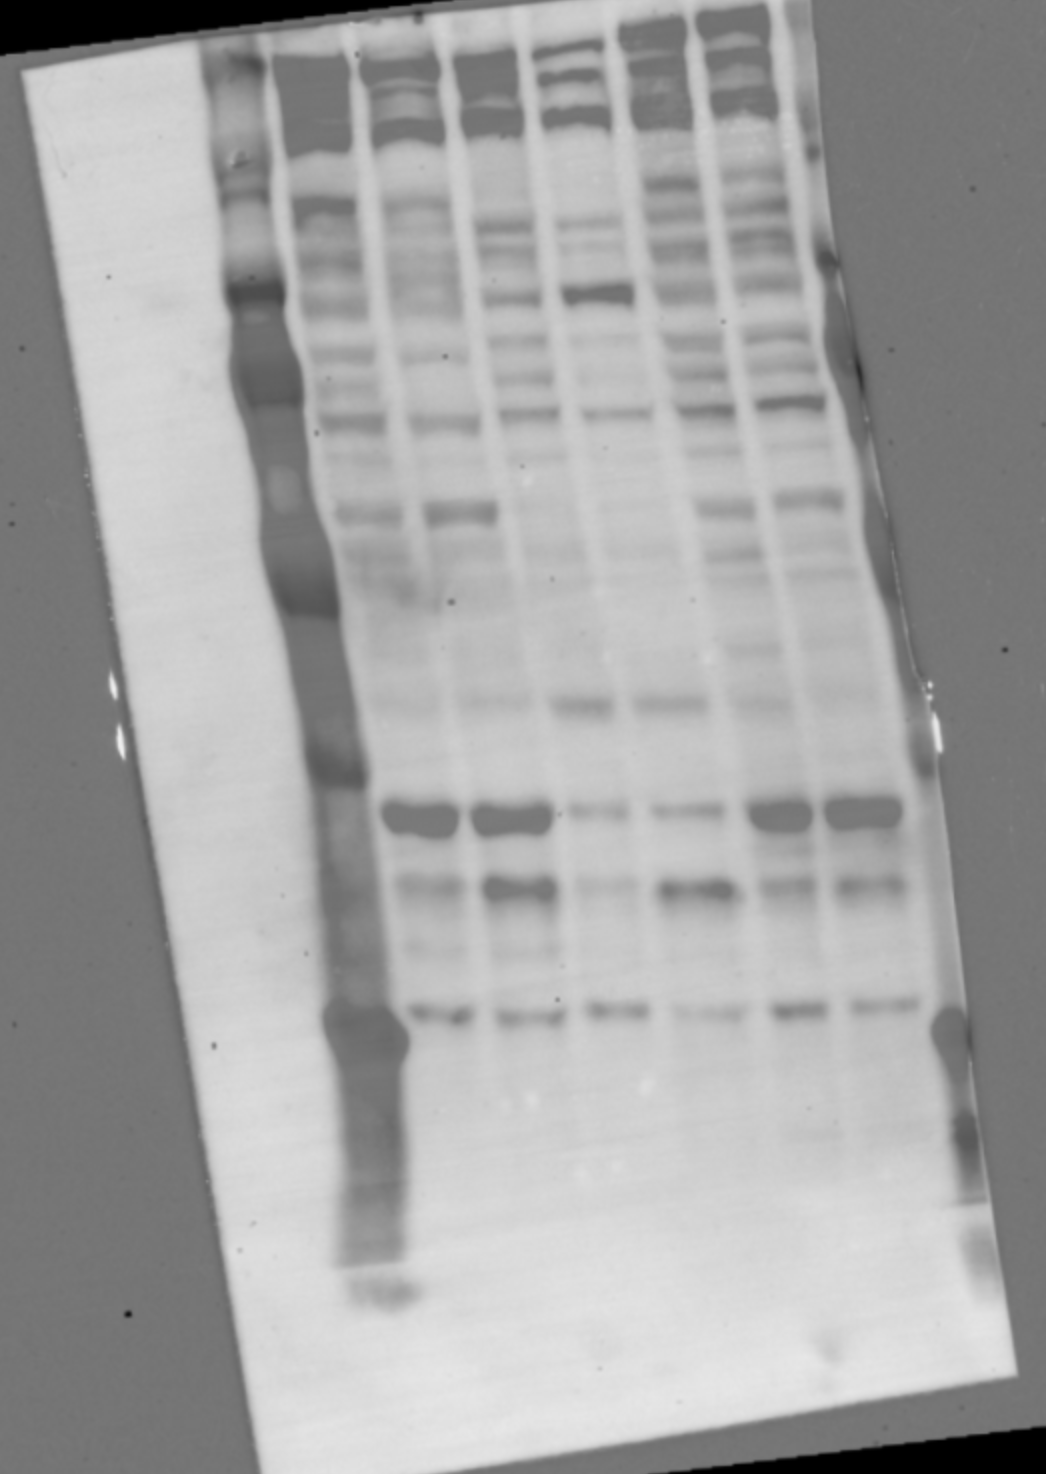
 **
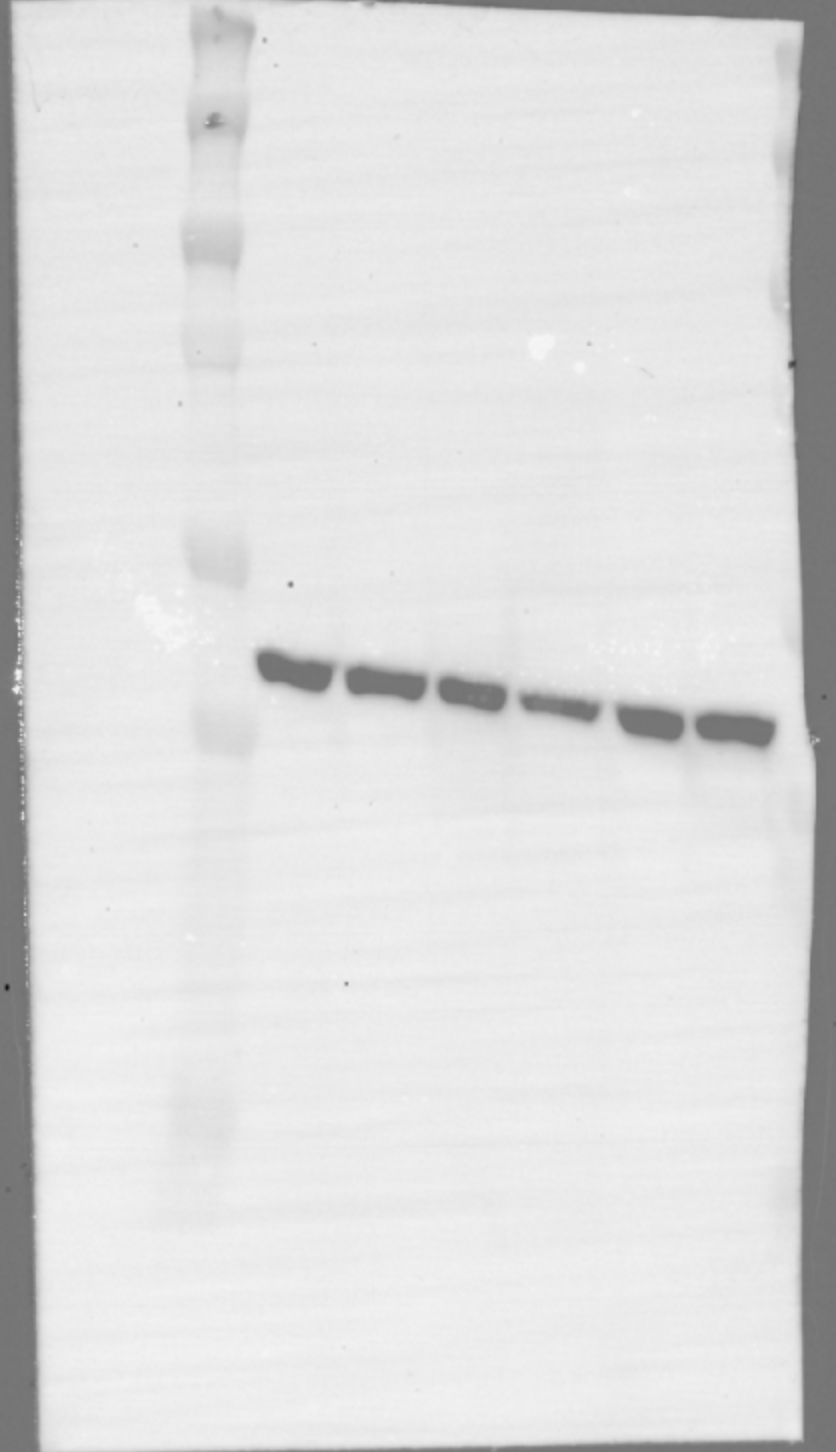
**

**Figure 4F**

**Anti-ATF-4 (49kDa) Anti-β-actin (42kDa)**

**
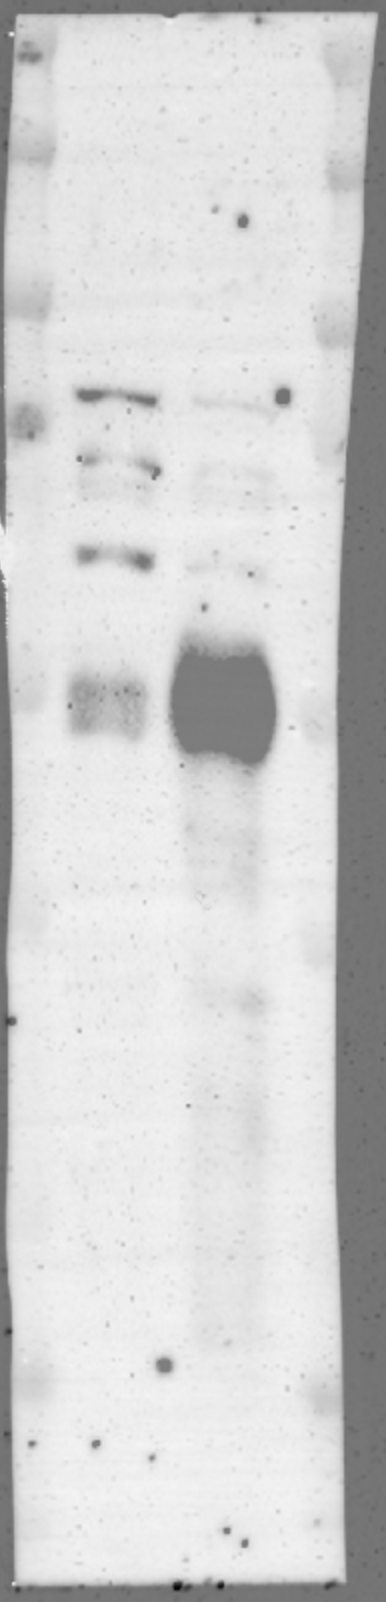
** **
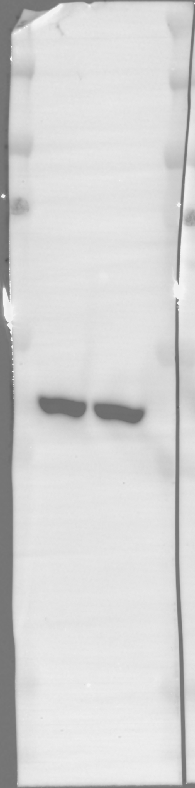
**

**Figure S2**

**Anti-IDH1 (R132H) (44kDa) Anti-α-tubulin (52kDa)**

**
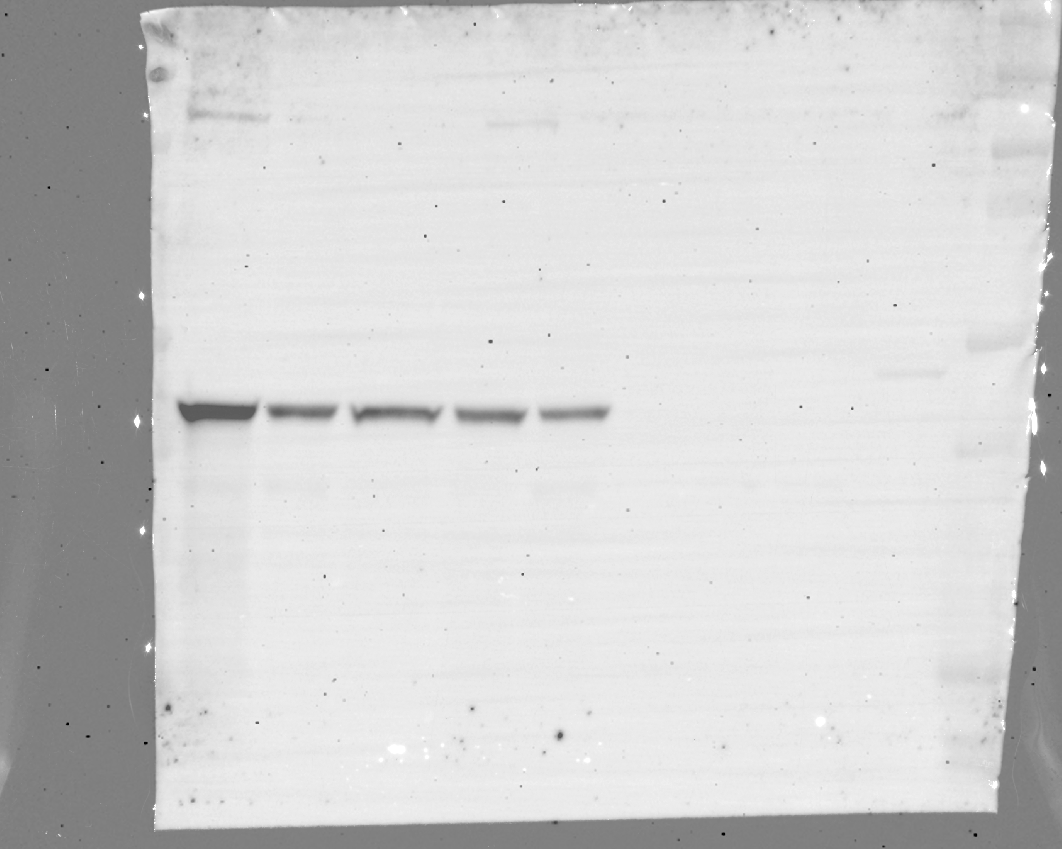

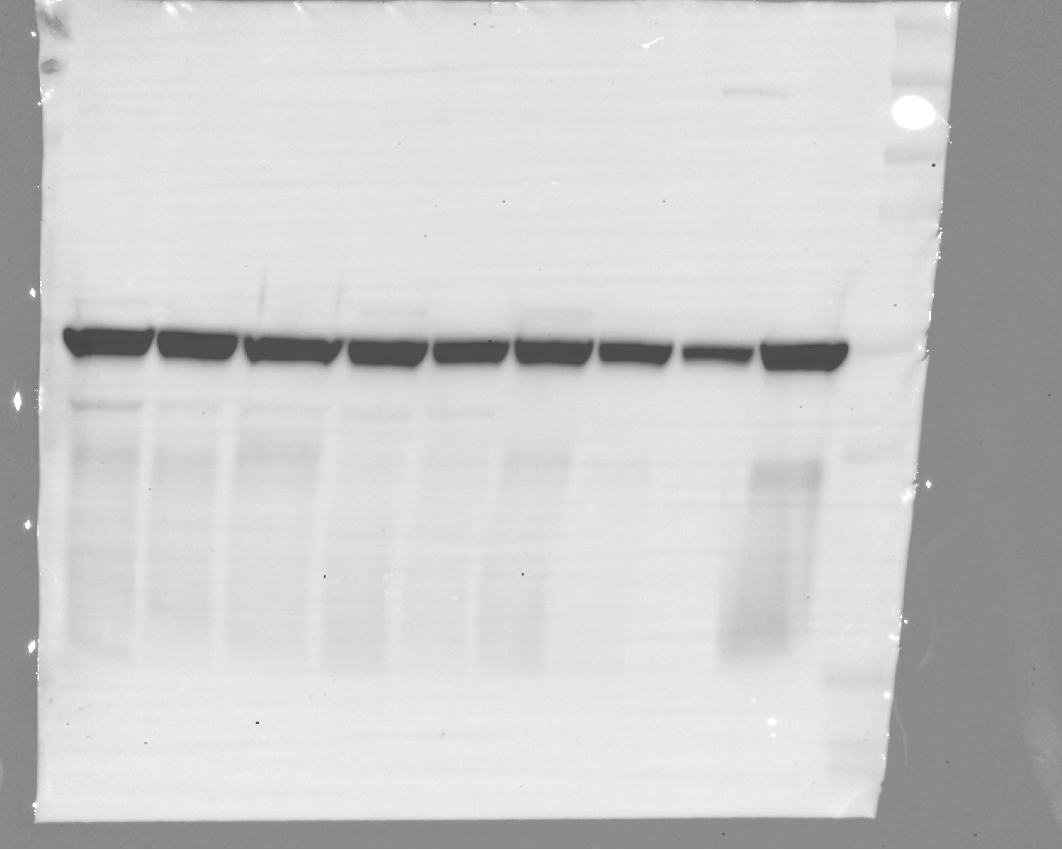
**

**Figure S13**

**Anti-AC (40kDa) Anti-β-actin (42kDa)**


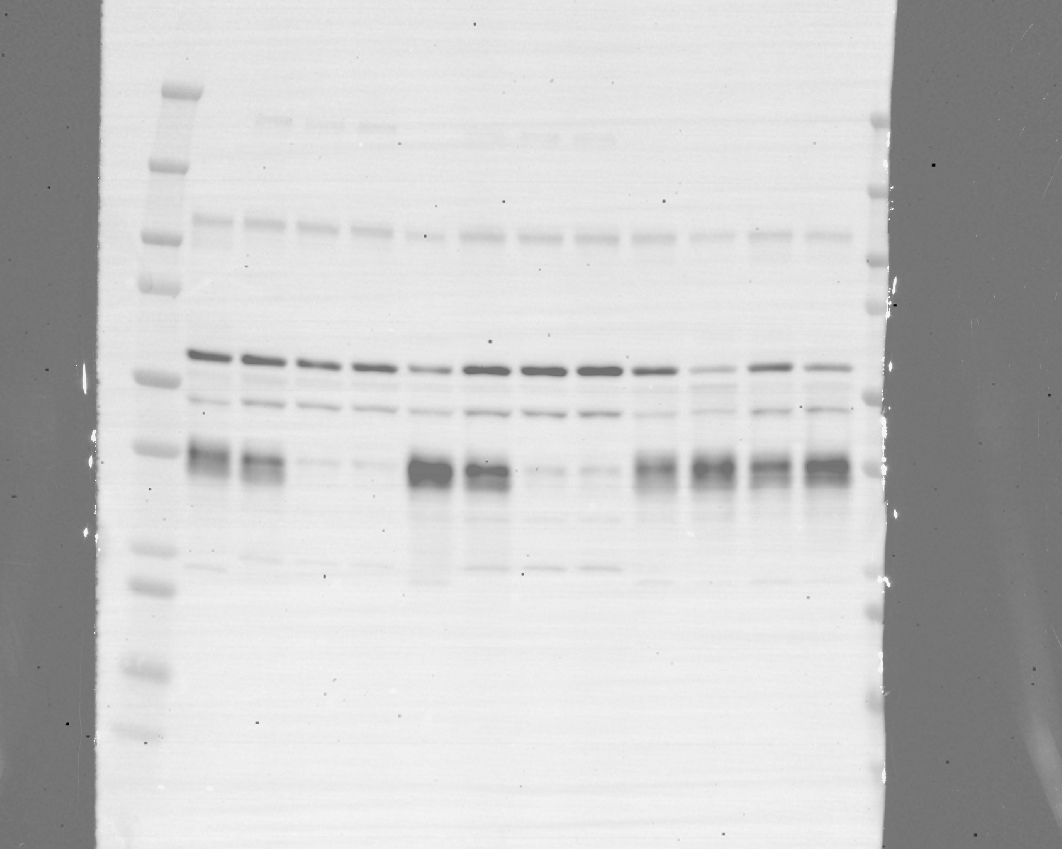

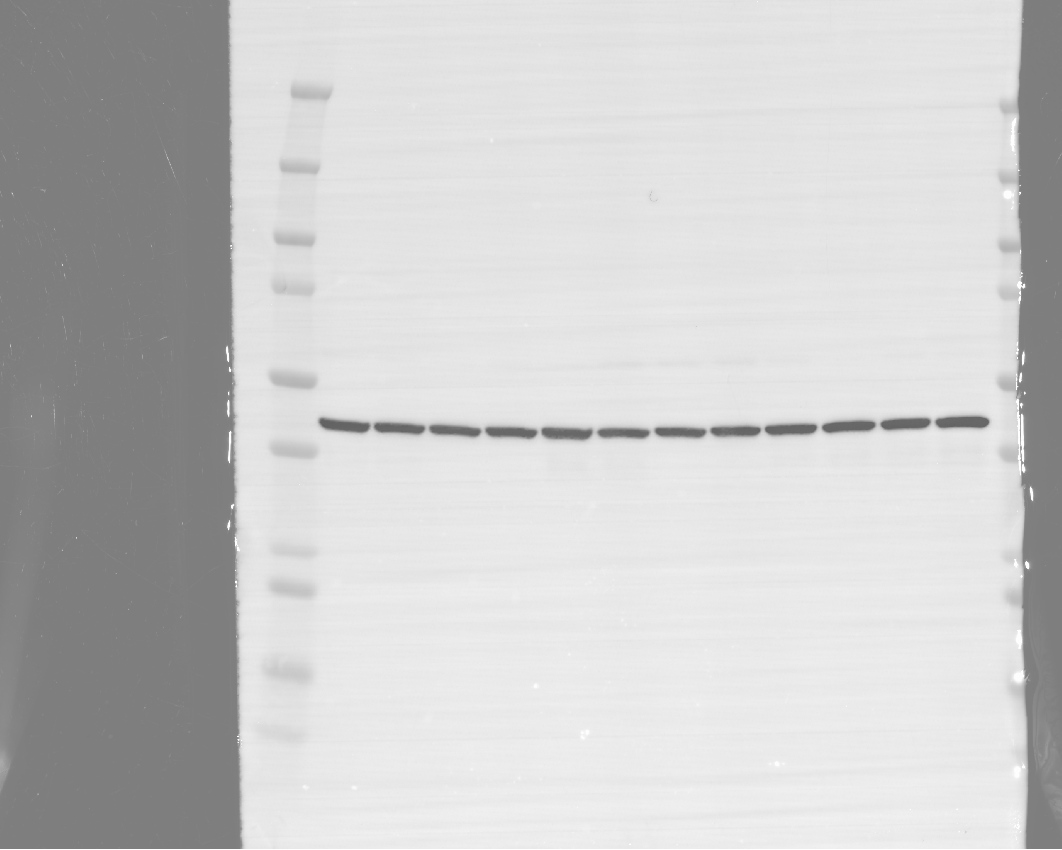


**Figure S17**

**Anti-BAX and anti-Cleaved-BAX (20-18kDa)** **Anti-β-actin (42kDa)**


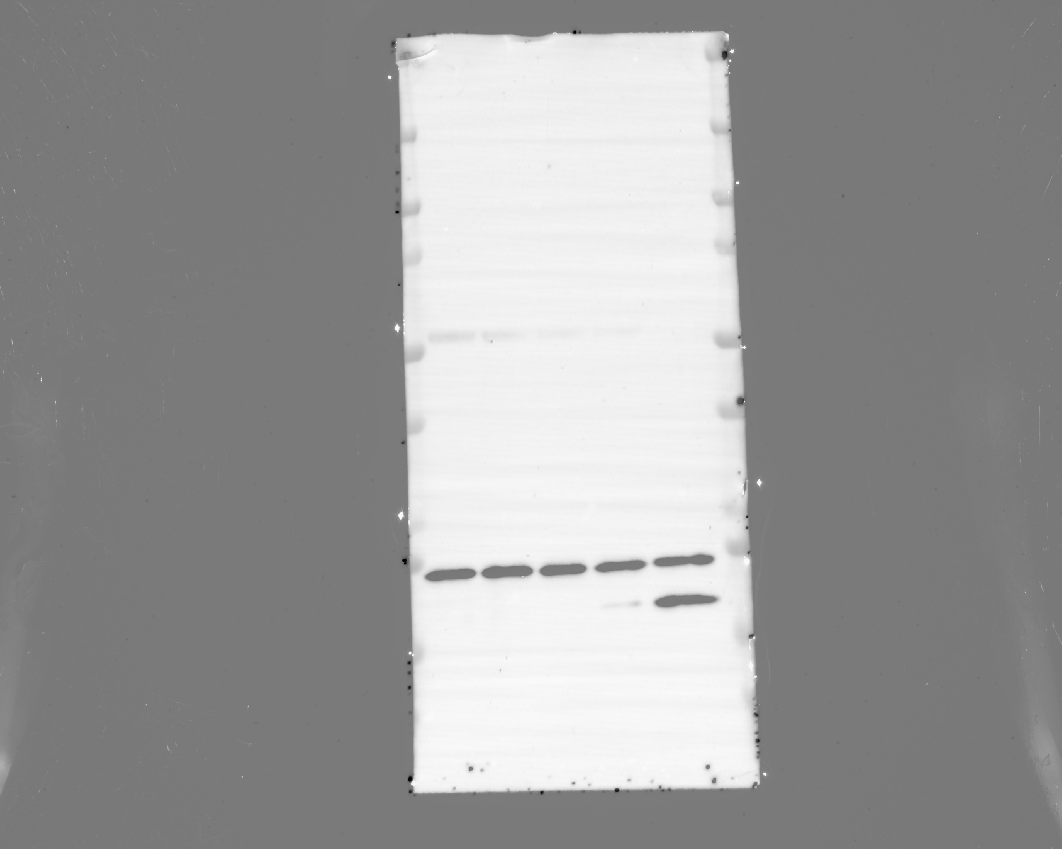

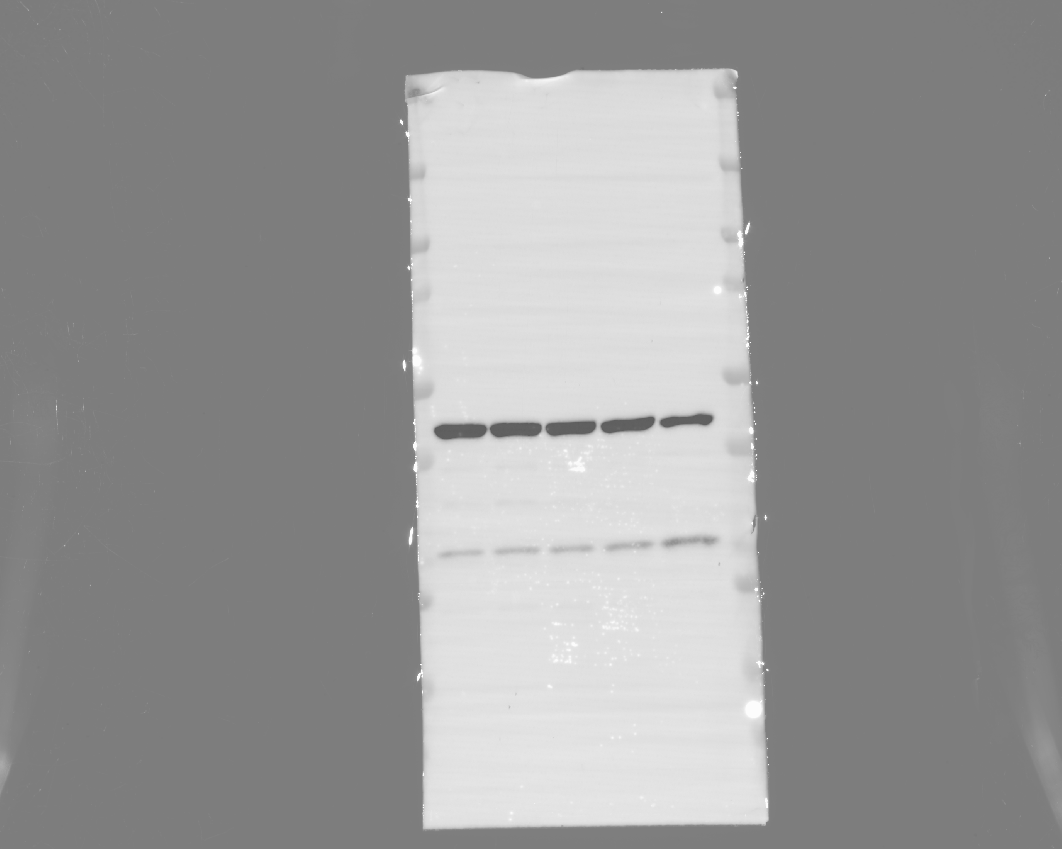


**Figure S17**

**Anti-BCL-2 (28kDa)**


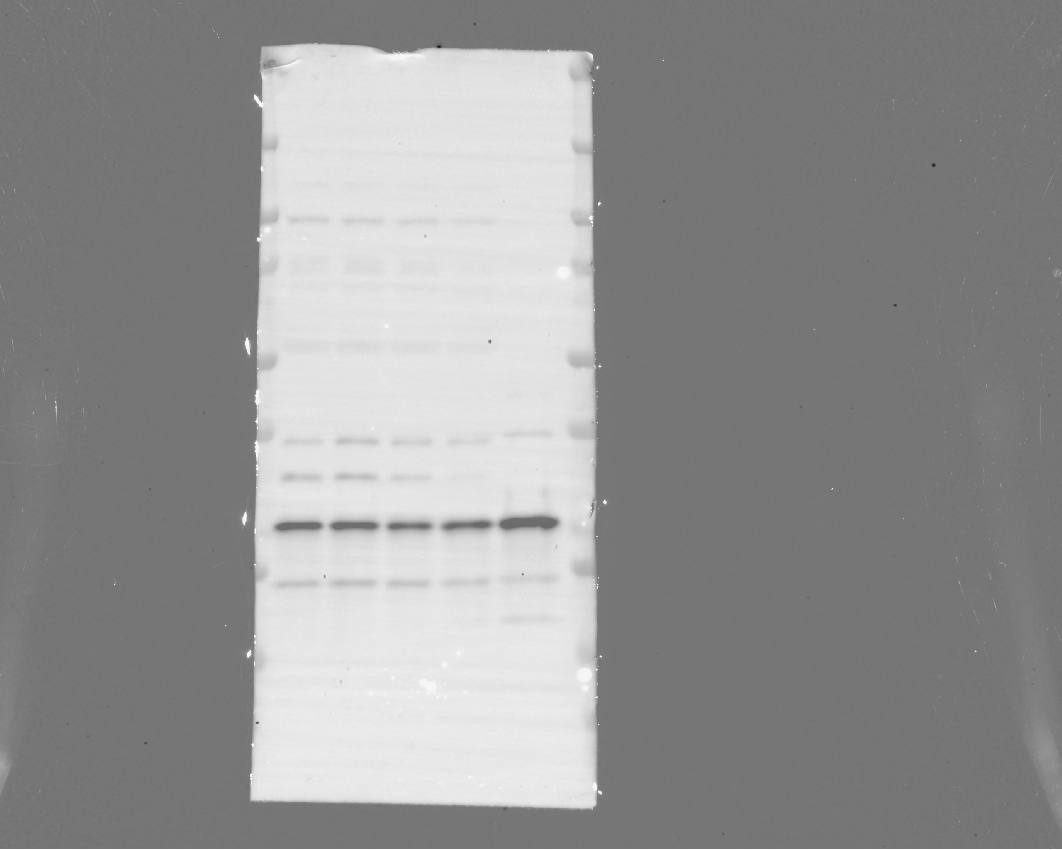


**Figure S18**

**Anti-Pro-Caspase 8 and anti-Caspase 8 (55-18kDa)** **Anti-β-actin (42kDa)**


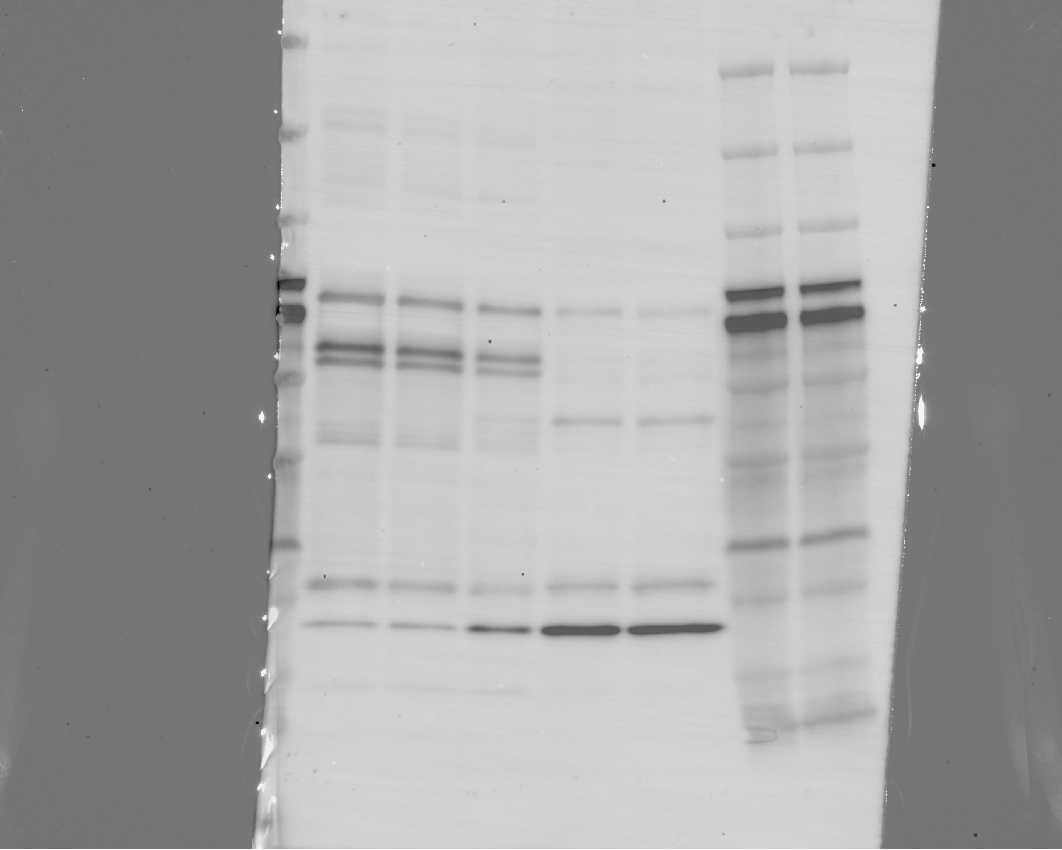

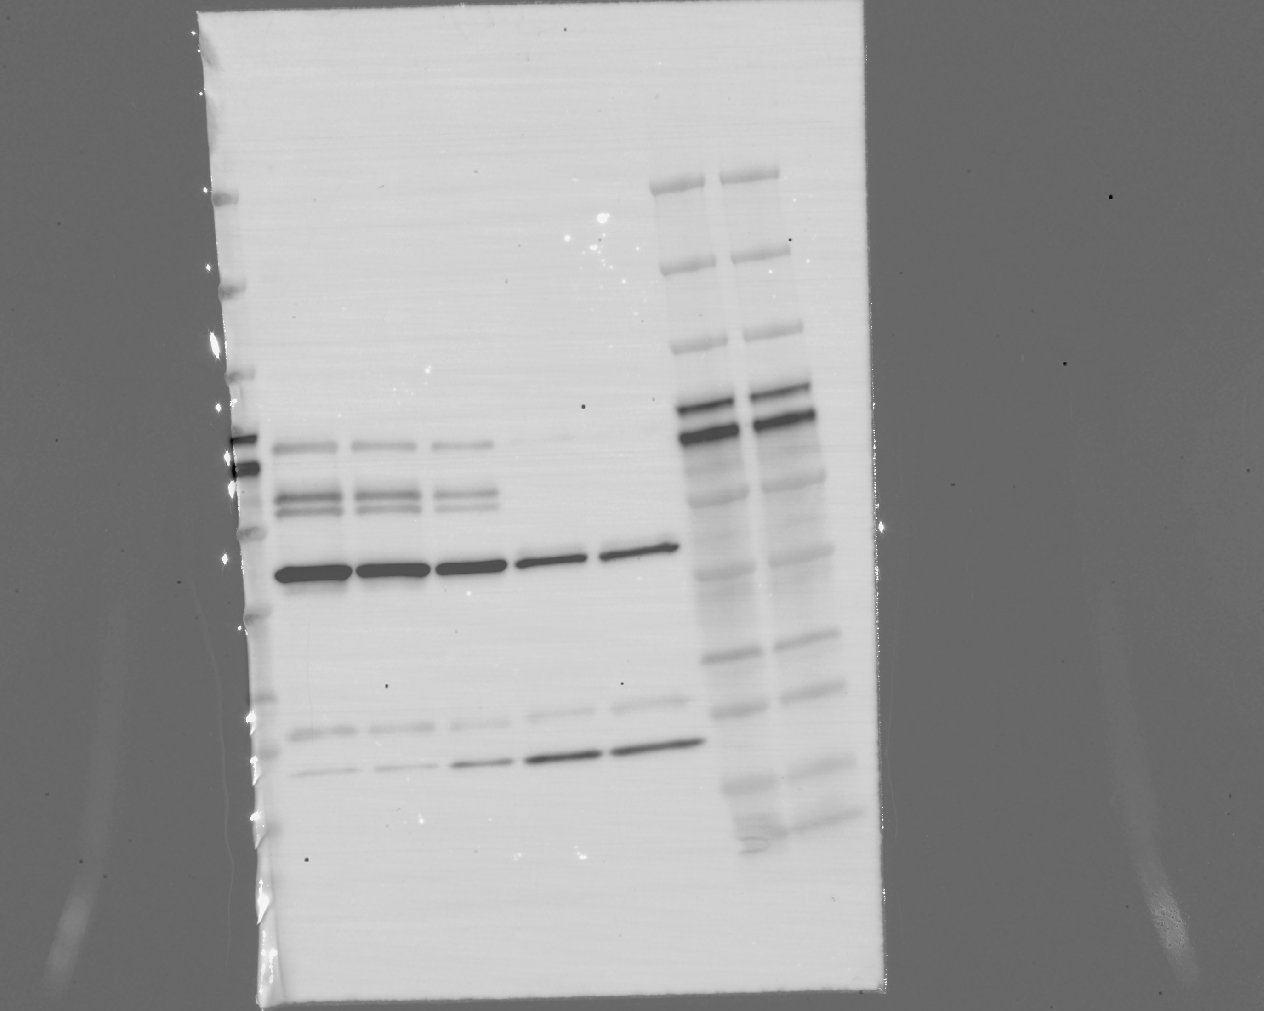


**Figure S23**

**Anti-ATF-4 (30kDa) Anti-β-actin (42kDa)**


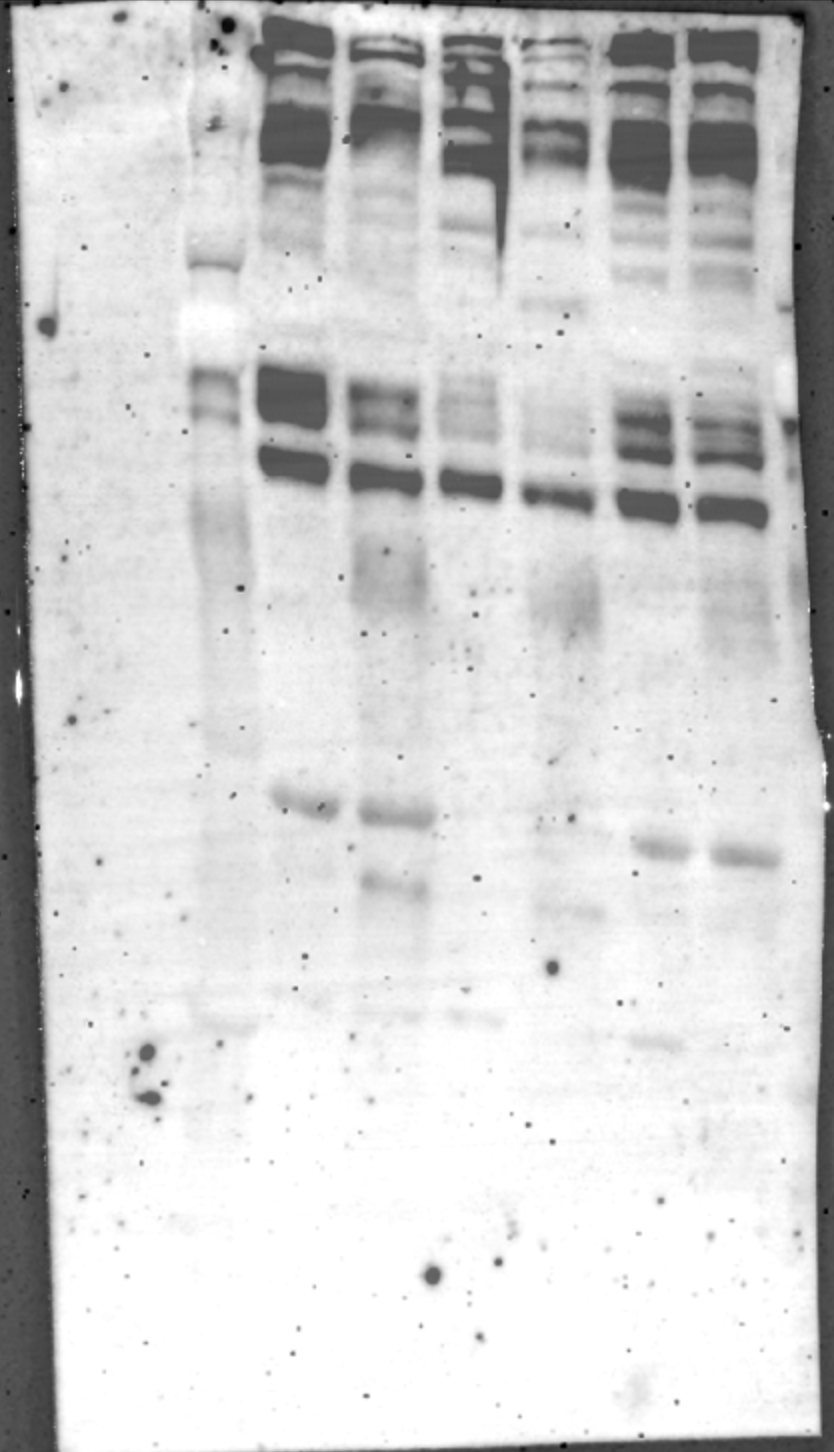
**
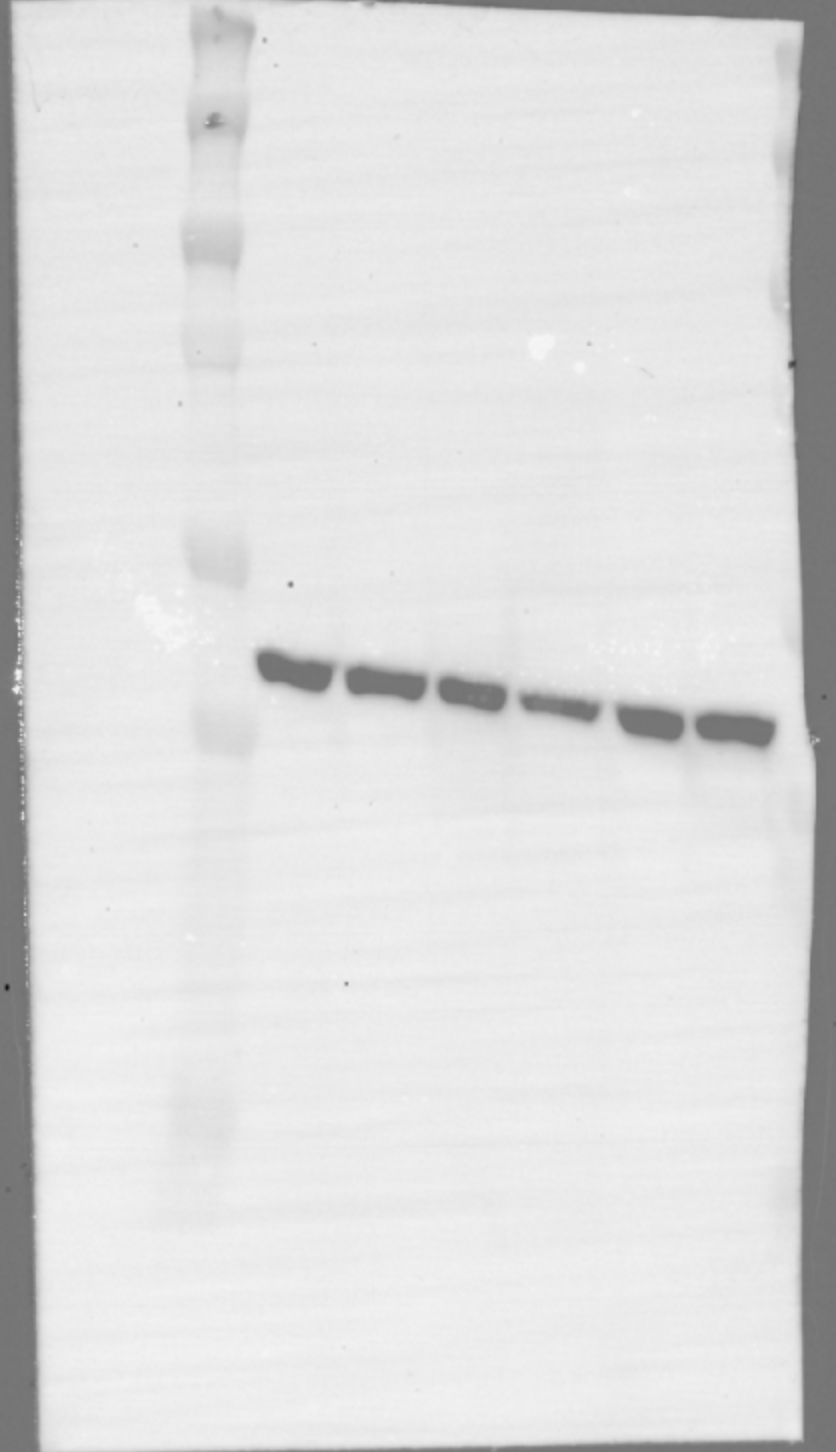
**

**Figure S24**

**Anti-p8 (11kDa) Anti-β-actin (42kDa)**


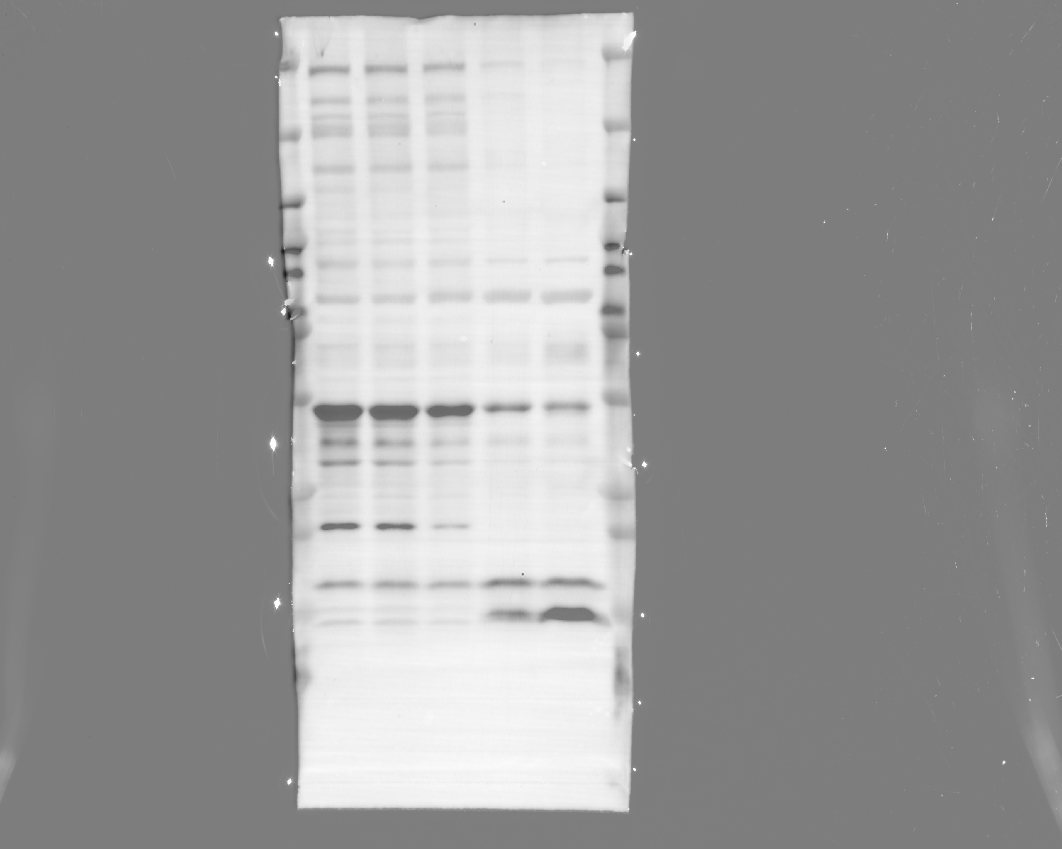

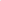

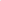

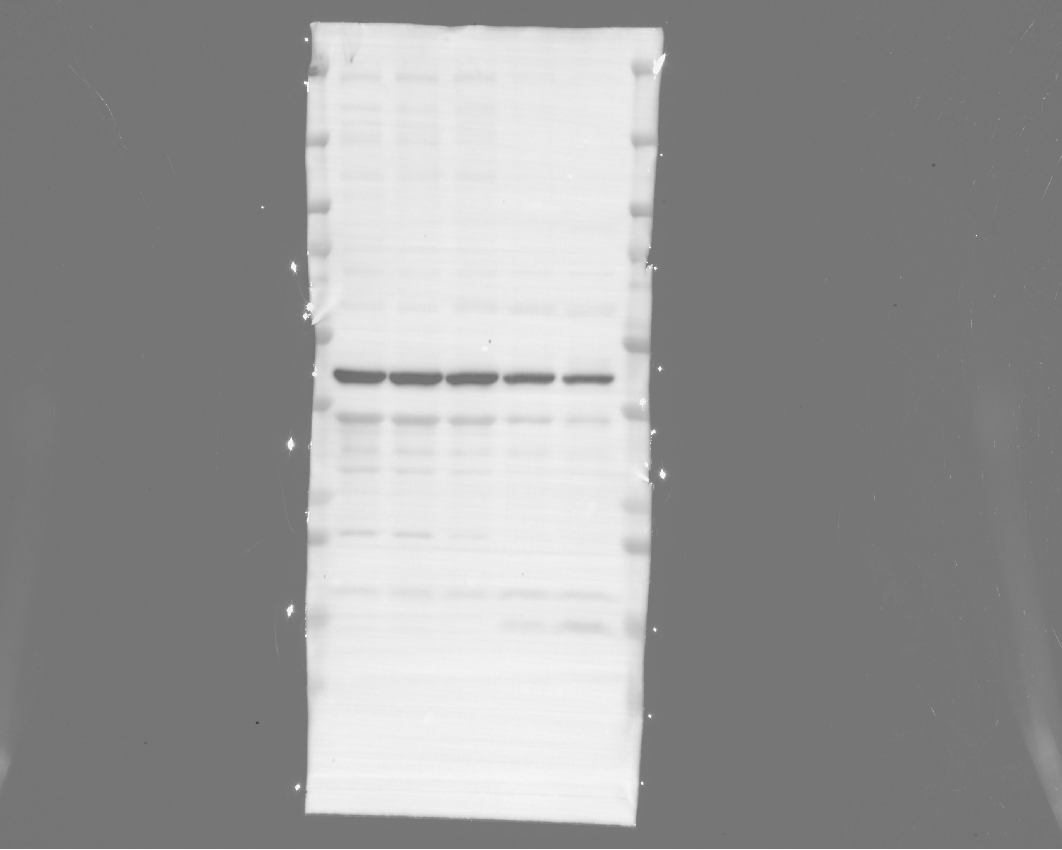

Supplement: Supplementary file 1 [file 5d31f94836382982bfe9497a.docx]
