# Supplementary material for: Acid Ceramidase Inhibition Disrupts Ceramide Homeostasis and Induces Mitochondrial Apoptosis in IDH1-Mutant Oligodendroglioma
Source: Research Square preprint supplement (doi:10.21203/rs.3.rs-9077389/v1), 2026-03-25
Supplement: Supplementary file 3 [file cf77c8783f68af4f0fac3036.xlsx]

## Sheet: 1B
OLIGODENDROGLIOMA						ASTROCYTOMA						GBM
ASAH1	ASAH2	ACER1	ACER2	ACER3		ASAH1	ASAH2	ACER1	ACER2	ACER3		ASAH1	ASAH2	ACER1	ACER2	ACER3
11.66	1.22	-1	6.1	9.67		13.04	1.12	-1	3.28	9.29		12.35	3.68	-1	5.07	9.24
13.41	1.44	-0.2	4.16	9.51		12.32	1.54	-0.24	4.95	8.96		11.9	3.24	-1	4.78	8.81
13.12	0.16	0.16	6.26	10.72		12.6	1.37	-1	4.59	9.88		11.97	1.6	-1	3.35	8.65
11.78	2.49	-1	5.69	9.64		11.26	1.64	-1	4.4	9.49		11.99	1.94	-1	4.32	8.27
11.17	3.62	-1	4.72	9.32		13.41	0.59	0.01	4.22	8.26		12.63	0.78	-1	4.6	9.17
11.71	3.73	-0.19	4.48	9.21		11.89	1.73	-1	4.85	9.66		11.78	2.32	-1	4.78	8.82
12.17	2.93	-1	4.99	9.46		12.41	1.12	-1	5.72	9.15		12.25	-1	-1	6.16	9.7
12.02	2.52	-1	5.14	8.85		12.17	1.95	-0.26	5.08	9.88		12.51	2.36	0.02	5.11	8.87
11.73	3.5	-1	4.62	9.53		12.53	1.6	-0.21	5.17	9.29		12.95	0.14	-1	5.35	9.77
11.74	2.36	0.51	4.22	8.95		12.46	1.15	-0.1	4.92	9.46		12.88	3.02	-1	4.41	9.07
12.14	3.01	-1	4.56	9.23		12.31	1.68	-1	5.38	9.85		13.37	2.62	0.61	4.82	9.53
11.75	2.13	-1	5.04	9.76		11.97	1.76	-1	5.4	9.04		12	3.03	-1	4.29	9.47
12.72	1.15	-1	2.71	9.21		12.15	2.63	0.64	4.56	8.68		12.48	-1	0.55	5.43	9.04
12.36	2.53	-1	4.55	8.64		12.29	1.36	-1	4.84	9.26		12.41	3.08	0.47	4.86	9.36
11.84	2.48	-0.29	4.4	9.54		11.56	3.9	0.64	4.45	9.41		11.44	1.48	-1	4.92	9.3
11.85	1.7	-1	5.12	9.23		11.47	2.41	-1	4.45	9.09		11.74	2.6	0.59	5.4	9.36
12.2	0.94	-1	4.8	9.27		11.98	3.46	0.54	3.8	9.52		12.55	3.39	2.12	3.68	9.23
11.82	3.98	-1	5.12	9.05		12.78	1.74	-1	3.83	8.51		12.74	1.56	-0.01	5.79	9.27
11.26	1.31	-0.16	4.22	8.47		11.23	0.59	-1	2.01	8.54		12.06	2.82	0.01	4.06	9.09
11.85	2.05	-1	4.25	9.39		12.01	3.21	0.76	4.27	9.33		12.22	-1	0.68	6.23	9.16
11.87	1.02	0.78	4.77	9.41		11.87	-1	-1	2.43	8.77		12.44	3.13	-1	4.6	9.3
12.48	1.61	-1	5.45	9.84		11.88	1.18	0.12	3.68	8.12		12	3.59	-1	4.44	9.28
11.45	2.59	0.11	5.6	9.29		11.56	-1	0.51	4.02	9.45		12.81	-1	0.2	3.83	9.46
11.1	1.74	0.02	5.85	9.66		12.13	1.6	-1	3.72	9.33		12.41	1.16	-1	4.49	9.46
11.12	3.29	-0.39	6.65	9.83		11.96	0.42	-1	3	8.5		12.46	-1	-1	5.22	9.7
12.35	3.31	-1	5.69	9.36		12.26	2.97	-0.17	4.49	8.9		12.4	-1	-1	4.45	9.21
12.04	2.28	0.23	4.7	9.37		12.09	0.73	-1	3.72	9.44		12.28	3	-1	4.59	9.61
11.5	4.52	-1	5.9	9.34		12.23	0.85	-0.1	5.18	9.15		12.84	-1	-1	4.92	9.01
12.36	1.32	-1	5	8.84		12.31	2.95	-0.18	3.87	8.9		11.87	-1	-1	4.36	8.84
11.97	3.18	-1	4.99	9.13		11.96	0.76	1	4.83	9.62		12.61	-1	1.39	3.25	8.29
12.65	2.27	-1	3.75	9.34		12.51	1.82	-1	5.45	10.22		11.74	2.8	-1	3.28	8.61
12.1	1.31	-1	4.13	8.94		12.09	3.38	-1	6.36	9.28		12.03	-1	-0.11	3.86	9.03
11.29	2.76	0.22	6.28	10.41		11.59	0.19	-1	5.67	9.23		12	2.46	-0.07	4.26	8.92
11.64	1.51	-0.39	4.04	9.1		12.37	1.7	0.61	4.42	9.23		12.74	0.71	-1	2.76	8.97
11.92	3.2	-1	4.83	9.92		12.35	0.95	-1	5.46	9.07		12.35	0.67	0.06	3.21	8.64
12.11	3.08	-1	4.89	8.86		12.48	2.16	-0.27	4.96	8.49		12.32	2.78	-1	4.7	9.53
12.58	2.22	-0.33	4.97	9.32		11.86	2.04	-1	5.62	9.47		12.47	2.38	0.52	5.04	9.81
11.72	2.58	-1	6.02	9.9		13.44	2.27	-1	5.57	9.53		11.63	2.89	0.91	5.05	8.42
12.11	2.47	-1	5.56	9.66		12.38	0.78	-0.43	5.61	9.03		13.34	2.08	-1	5.44	9.13
12.15	2.16	-1	5.27	9.46		12.4	3.81	-1	5.76	9.03		12.13	3.77	-1	6.32	9.58
12.83	3.25	0.26	4.59	9.81		11.55	3.14	-0.29	4.69	9.32		11.89	3.15	-1	5.82	9.16
11.66	4.29	-1	5.36	9.75		12.14	3.3	-1	5.3	9.6		12.61	1.46	-1	5.17	9.32
11.96	2.73	-0.28	4.7	9.37		11.98	4.49	-0.38	4.31	9.64		12.13	0.88	-1	5.7	9.87
12.02	2.79	-0.36	5.69	9.61		12.97	0.88	-0.38	5.84	9.31		11.96	1.52	-1	5.15	9.72
11.95	1.46	-0.19	5.6	8.88		11.45	1.35	-0.14	5.21	9.24		12.37	2.04	-1	5.46	9.78
11.59	4.42	-0.05	5.86	9.59		12.24	1.6	-0.12	2.11	8.82		11.86	3.86	1.96	5.11	8.86
12.24	-1	-1	2.6	8.44		11.92	1.85	-0.09	4	8.96		11.85	3.24	-0.11	4.44	9.31
12.26	-0.1	-0.1	4.32	8.49		12.89	2.29	0.46	4.49	9.35		10.81	2.51	0.53	4.65	8.3
11.28	1.67	-1	5.79	9.21		12.58	1.14	-0.11	3.82	8.73		11.33	3.66	-1	5.45	9.42
10.9	3.96	-1	4.36	8.55		11.67	1.23	-1	3.97	8.98		10.95	0.87	-1	4.76	8.38
11.44	3.21	-1	4.37	9.04		10.98	3.36	0.36	2.91	8.07		13.4	-1	0.02	4.89	9.85
12.17	-0.28	0.2	3.26	8.44		11.82	3.67	-0.09	4.27	9.31		12.26	3.35	-0.06	5.07	9.63
12.26	2.22	0.71	5.13	9.5		11.26	0.2	-1	4.3	9.42		12.61	-1	-1	5.06	8.97
12.21	3.62	-1	4.96	8.75		13	3.19	-1	5.34	9.22		12.46	3.82	-0.04	5.71	9.49
11.91	1.36	-0.33	4.77	8.92		12.71	-0.02	-1	5.27	9.17		12.06	2.84	-0.16	4.76	9.76
12.28	2.03	-0.16	3.85	9.24		11.04	2.85	-1	2.85	9.92		12.23	3.5	-1	4.04	9.57
12.04	-0.22	-0.22	4.61	9.55		12.18	1.16	-1	5.24	9.45		11.15	0.99	0.32	6.89	8.78
11.26	1.42	-1	5.41	8.8		12.26	3.04	-1	5.02	9.6		12.65	1.27	-1	4.86	9.32
11.7	2.87	-1	5.36	9.49		11.55	2.03	-1	4.4	8.59		12.01	0.58	-1	4.9	8.99
11.77	1.96	0.32	4.57	9.69		12.02	1.46	-1	5.1	8.67		12.29	-0.03	-1	4.92	8.51
12.17	1.07	0.77	6.25	9.9		11.92	1.67	-0.18	4.15	9.47		12.26	-1	-1	3.68	10.48
11.6	2.36	-1	5.64	9.01		11.37	4.52	-1	4.6	9.34		12.41	1.67	-1	4.23	9.49
11.62	-0.2	-1	6.1	8.36		11.95	1.44	0.54	3.23	8.9		11.89	3.46	0.5	5.18	9.19
11.61	2.17	-0.21	5.92	10.22		11.98	-1	-1	3.81	9.23		12.17	3.42	-1	4.55	8.97
10.99	3.48	-0.18	5.5	9.11		12	2.55	0.34	4.33	8.33		11.93	1.05	-1	5.68	9.38
12.21	-0.14	0.4	3.58	8.83		11.58	-0.01	-1	3.93	9.24		11.75	1.69	-1	5.64	8.93
11.87	2.85	-1	4.42	9.71		12.44	1.93	-1	5.51	9.06		12.31	-1	-1	3.57	8.92
12.24	1.68	-1	4.32	9.07		11.65	2.8	-1	3.95	9.55		12.47	-1	-1	5.18	8.64
11.82	3.61	-0.29	5.2	9.03		12.07	1.59	-1	3.61	8.66		12.01	2.26	-1	4.71	8.95
11.96	1.35	-1	3.68	8.95		12.51	1.73	-1	3.82	8.81		11.54	2.92	1.28	3.15	8.92
12.37	3.86	-1	4.56	9.48		12.59	1.1	0.21	3.07	8.83		11.96	3.31	-1	4.77	8.19
11.62	0.25	-1	3.07	8		13	3.16	-1	4.4	9.81		12.73	2.92	-1	3.34	9.89
12.15	2.04	-1	5.89	10.22		12.43	-0.2	-0.2	5.24	9.48		12.05	-0.11	-1	5.03	9.51
12.17	0.85	-1	4.89	9.03		11.82	1.91	0.21	4.4	8.99		12.4	-1	-1	5.2	9.07
11.66	2.58	-1	5.4	9.57		13.07	2.84	-1	4.72	9.96		11.98	-1	0.29	3.84	9.66
12.21	3.23	-0.25	4.97	9.93		11.84	3.17	-1	2.95	8.96		12.06	1.6	0.18	5.14	9.51
11.06	2.34	-1	6.04	9.05		12.69	2.32	0.14	3.38	8.83		12.41	2.58	-1	4.24	9.42
12.4	1.21	-1	4.04	9.87		10.81	-1	-1	3.86	7.8		12.59	0.71	0.71	4.42	8.89
11.7	1.92	-1	3.62	8.8		11.89	2.63	0.02	1.04	9.08		11.53	2.24	2.24	4.07	9.64
11.51	-0.1	-1	2.13	9.04		11.29	-1	-1	1.4	8.84		12.77	1.46	1	4.86	9.01
11.53	0.01	-1	2.82	8.53		11.55	3.32	0.47	5.9	9.09		12.4	3.15	1.12	4.77	8.92
12.28	-0.12	-1	3.28	9.04		12.49	0	0	4.61	9.56		13.28	2.05	-1	5.34	9.4
12.11	1.38	-1	4.5	9.23		12	2.07	0.41	4.09	9.01		12.51	0.55	0.55	2.95	9.14
12.01	2.82	-1	4.03	9.04		11.53	2.43	-1	4.27	8.93		11.62	0.63	-1	3.53	8.92
11.71	2.03	-0.32	5.3	10.05		13.37	2.88	-1	4.25	9.42		13.38	2.77	-1	4.76	9.58
12.34	1.76	-1	6.02	9.51		12.81	2.34	-1	4.34	9.49		12.43	2.64	0.1	4	9.32
11.62	2.24	-1	4.32	9.66		12.88	2.96	-0.21	4.26	9.37		13.1	2.46	-1	5.5	9.16
12.38	3.59	-1	4.6	9.67		12.81	2.25	-1	4.6	10.13		11.57	3.84	1.09	5.32	10.07
11.81	1.5	-0.17	5.03	9.29		12.3	0.21	-1	4.92	9.3		11.66	3.88	-1	4.54	8.87
12.78	3.9	-1	4.41	9.56		11.66	3.58	-1	5.24	8.57		11.65	2.92	-1	6.02	9.91
11.5	2.49	0.14	5.28	9.58		12.12	2.64	-1	5.04	9.42		12.29	0.5	0.5	5.06	9.63
11.73	2.35	-1	4.82	10.11		13.63	2.8	-1	5.46	8.89		11.44	2.65	-1	4.63	9.06
12.68	1.4	-1	3.64	9.66		12.78	1.61	-1	3.09	8.67		11.26	0.61	-1	3.28	8.2
11.74	1.63	-0.28	3.31	9		12.72	1.85	-0.24	5.02	8.8		12.39	2.22	1.11	3.07	9.4
11.98	2.94	-1	4.85	9.35		12.89	0.95	-0.22	4.18	8.88		12.54	1.94	-1	5.18	9.94
11.88	-0.01	-1	5.43	8.88		11.88	3.39	-1	4.91	9.22		11.7	2.79	-1	5.23	8.57
11.92	2.65	-1	5.32	10.01		12.82	-1	-0.24	5.74	10		12.76	4.39	-1	3.87	8.73
12.53	2.04	-0.15	3.28	8.93		12.53	1.84	-1	4.56	9.94		11.5	3.35	-0.02	4.45	9.08
11.98	2.52	-0.34	5.39	9.55		12.11	3.01	-1	4.86	11.06		12.5	3	0.59	4.71	8.82
11.97	1.88	-1	5.54	9.58		11.65	1.79	-0.2	4.4	9.65		11.67	1.35	-1	4.97	9.31
11.35	2.11	-1	4.81	8.99		12.58	1.86	-0.3	4.47	8.44		11.59	2.63	-1	4.69	8.75
12.72	1.53	-1	4.43	9.71		11.64	2.43	-0.08	5.04	9.63		11.89	2.33	-1	4.53	8.57
12.11	0.69	-1	5.67	9.42		12.51	1.9	0.46	4.37	9.6		12.01	3.17	0.71	4.35	9.12
11.67	2.95	0.21	5.64	9.41		13.18	0.86	1.1	5.01	9.63		12.37	2.86	-1	5.12	8.97
11.82	4	-1	5.1	9.69		12.81	2.44	-1	4.67	9.86		12.51	1.57	-1	2.65	9.74
11.59	1.41	0.51	5.63	9.23		13.36	0.89	-1	5.19	9.43		11.34	2.19	-0.07	4.18	9.05
11.58	2.78	0.23	5.31	9.48		11.56	3.45	-1	5.29	8.74		12.74	-1	0.08	4.43	9.25
12.1	2.45	-0.31	4.47	8.83		11.28	-1	0.93	2.01	8.32		12.04	2.55	-1	4.22	8.97
11.73	1.97	-1	5.2	9.48		11.67	0.54	-1	4.22	8.85		12.08	-1	-1	4.36	9.34
11.37	1.13	-1	4.71	9.52		12.22	0.72	0.34	5.12	9.05		12.18	-1	-1	4.43	9.2
12.62	0.34	-1	6.12	8.95		11.61	1.76	0.54	4.77	9.35		11.85	1.43	-1	3.82	8.63
12.07	2.25	-1	5.4	8.63		12.54	1.2	-1	4.89	9.65		11.62	3.19	-1	4.73	9.09
11.86	2.29	-0.3	5.27	9.11		11.73	1.95	-1	3.75	8.75		11.61	1.53	1.2	3.15	9.17
11.17	2.5	-0.11	4.87	8.58		12.7	1.94	-0.03	3.8	8.98		12.28	2.74	-1	3.06	9
11.68	3.01	-1	6.48	9.3		12.18	2.02	0.47	2.84	8.88		11.96	2.39	-0.04	4.49	9.05
11.03	3.57	-1	5.51	9.53		12.57	0	0	2.33	8.73		12.46	0.56	0.56	4.75	9.47
12.15	1.25	-1	4.12	9.39		11.92	-1	-1	2.11	7.93		12.77	0.65	-1	4.65	9.33
12.11	3.44	-1	5.19	9.72		12.49	-1	-1	2.48	8.9		12.53	2.01	-1	4.73	8.36
11.46	4.05	0.48	5.21	9.02		12.86	2.4	-1	4.49	9.16		11.08	2.91	-1	5.03	8.82
11.15	2.71	-0.23	4.99	9.57		12.23	4	-1	4.69	9.8		11.94	1.2	-1	4.87	9.08
11.74	-1	-1	3.64	9.03		11.98	1.87	0.63	3.99	9.37		10.8	3.74	-0.06	4.31	9.53
12.01	1.84	-1	5.19	8.58		12.32	2.33	-1	4.53	9.23		11.38	3.16	-1	4.72	8.8
11.39	2.19	-1	5.42	9.29		12.68	-1	-1	4.42	9.43		12.03	-1	-1	5.55	8.32
12.68	3.1	-1	4.32	9.73		12.07	3	0.52	4.79	9.47		12.38	3.58	2.11	3.4	9.27
12.71	-0.02	0.55	2.42	9.64		12.84	1.29	-1	3.23	9.59		11.64	2.43	-0.08	4.79	8.63
12.09	2.45	0.49	5.57	9.43		11.62	2.68	-0.27	4.47	9.55		13.01	2.2	-1	4.39	9.24
11.53	3.28	-1	4.6	9.59		11.46	3.92	-1	5.04	9.15		12.63	2.27	-1	5.66	9.39
11.64	1.7	-1	4.33	9.24		12.82	1.33	-1	4.69	9.17		12.23	3.36	-1	4.05	8.81
11.43	-1	-1	1.18	8.12		12.45	1.93	0.41	3.87	9.49		11.94	3.04	0.19	4.53	8.41
11.99	0.94	-1	5.39	10.04		11.9	1.83	0.01	4.91	9.67		13.09	2.76	0.1	3.58	8.97
11.79	3.44	-0.07	5.83	9.07		12.09	3.18	-1	5.17	9.26		11.5	1.3	-1	4.49	8.99
12.09	2.95	-1	6.32	9.69		12.68	0.58	-1	3.45	7.74		12.46	-1	-1	5.93	9.3
11.77	2.55	-1	5.75	9.59		11.96	2.12	0.55	4.47	8.55		12.27	-1	1.13	4.95	8.48
11.9	2.96	0.46	5.15	9.89		12.31	0.01	0.01	1.6	8.28		11.74	1.41	-1	4.6	8.72
10.98	-1	-1	3.08	8.81		12.1	2.25	-1	4.31	8.26		12.53	3.04	-0.2	4.81	9.99
13	3.02	-0.29	4.03	9.23		13.14	-1	-1	3.87	8.4		12.18	2.83	0.07	5.57	8.8
11.78	1.87	-1	4.13	9.16		11.42	2.64	-1	2.5	8.76		11.88	-1	-1	5.63	9.53
12.72	0.95	-0.03	5.41	8.51		12.91	0.68	-1	4.14	8.68		11.62	1.52	-1	5.15	8.76
11.44	2.57	1.21	4.83	9.05		12.05	1.69	-1	3.7	9.54		12.29	2.91	-1	3.71	8.85
11.49	0.5	-1	4.62	8.93		12.1	1.74	-1	4.68	9.33		12.99	1.33	0.59	5.05	9.58
10.2	3.16	-1	3.58	7.22		12.61	1.61	-1	3.55	9.22		11.87	1.51	0.12	5.19	8.95
11.9	0.59	0.01	4.1	10.47		13.46	0.7	-1	3.4	9.01		12.18	0.78	0.15	3.8	8.23
10.94	3.65	0.25	4.12	9.33		11.37	-0.11	-0.11	3.78	8.55		12.11	2.53	-1	5.68	8.95
11.71	2.99	-1	3.65	9.29		11.68	1	0.59	1.81	8.2		12.5	-1	-1	5.49	9.78
11.89	2.52	-1	3.32	9.47		11.88	1.98	-1	4.15	8.4		11.53	2.97	-1	4.87	8.86
11.85	2.52	-1	4.48	9.11		12.18	1.18	-0.09	3.29	8.65		12.06	3.54	-1	4.03	9.95
12.06	-1	-1	2.6	8.72		12.1	-0.04	-1	3.97	8.48		12.16	3.01	-1	3.62	9.02
11.84	3.59	-1	4.72	9.1		12.41	1.98	-1	5.62	9.28		12.33	2.18	0.38	4.18	9.28
12.31	2.28	-1	5.4	9.54		12.46	-1	-1	5.86	8.73		12.08	2.73	-1	6.67	8.89
12.15	3.5	-1	4.35	9.14		12.26	2.17	-0.15	4.46	9.61		12.43	-1	-1	4.28	9.04
12.27	3.08	-1	4.56	8.8		12.23	0.43	-1	3.97	9.29		11.72	1.92	-0.04	3.67	8.85
11.98	3.05	-0.2	4.62	9.17		11.67	-0.15	0.38	4.62	9.05		11.56	0.58	-1	4.24	8.49
11.82	3.13	-1	4.97	9.51		12.34	2.79	-1	3.78	9.57
11.55	0.67	0.67	3.29	8.58		12.82	0.96	-1	4.97	8.95
11.92	0.87	-1	4.59	9.24		12.2	1.2	-1	5.47	9.62
11.92	0.03	0.03	2.86	8.46		11.78	1.56	0.57	5.28	8.44
11.94	2.35	0.42	3.4	9.21		11.78	2.77	-1	5.81	9.99
11.93	0.99	-1	4.69	9.06		11.87	-1	1.08	4.27	7.58
12.27	1.98	-1	4.76	9.57		12.68	2.64	-1	6.1	9.29
11.82	2.82	-1	4.47	8.78		12.28	1.24	-1	4.15	9.48
11.97	3.17	-1	4.87	9.91		11.2	0.79	-1	4.51	9.29
12.24	3.62	-1	5.17	9.75		12.09	1.08	-0.28	4.83	9.46
11.57	4.06	-1	4.67	9.33		13.23	2.62	-1	3.85	8.97
12.2	2.2	0.4	4.7	10.08		11.5	2.71	-1	2.71	8.87
12.01	0.89	-0.07	5.04	9.49		12.04	1.23	-0.06	3.97	8.92
10.98	2.12	-1	4.76	9.34		12.71	2.42	-0.02	3.82	9.06
12.03	1.02	-1	4.84	9.85		12.38	0.57	-0.01	4.33	8.91
11.86	3.79	-1	5.27	9.01		12.15	1.91	-1	5.42	9.26
11.89	2.27	-1	5.7	9.73		12.8	2.31	0.08	4.4	9
11.53	2.48	-0.17	5.64	9.47		12.17	1.04	-1	4.26	9.72
11.66	1.63	-1	3.86	9.1		12	1.07	-0.15	5.57	9.67
11.76	1.82	-1	4.96	9.63		12.73	0.54	-1	3.46	8.7
11.47	3.21	-1	5.3	9.03		12.04	1.18	1.18	4.07	7.58
11.72	4.02	-0.13	5.22	9.78		11.73	1.77	-1	4.61	8.91
11.78	3.2	-1	4.8	9.39		11.63	3.25	0.94	3.97	9.46
11.51	3.6	-1	5.18	9.12		11.57	3.6	0.07	4.87	8.77
12.69	1.69	-0.07	4.77	8.95		11.97	3.16	-0.32	5.57	9.81
12.18	1.46	-1	3.94	7.98		11.56	3.63	0.26	4.9	9.22
12.21	0.42	-1	4.83	9.5		12.28	0.63	-1	3.83	8.99
12.03	2.47	-1	4.78	9.56		11.78	3.18	-0.17	4.75	9.1
11.92	2.25	-1	5.1	8.94		11.92	1.55	-1	3.88	9.24
11.59	1.47	0.33	4.61	9.21		12.04	2.64	-1	3.53	9.31
11.7	3.02	0.43	4.89	9.04		11.9	-1	-1	1.88	8.95
12.19	0	0	4.46	9.28		12.34	2.94	-1	3.34	10.06
11.72	1.61	0.68	3.92	9.06		13.71	-1	-1	0.33	8.17
12.99	2.37	0.03	2.96	9.21		12.33	2.38	-0.04	4.53	9.07
11.98	-1	0.08	2.31	7.78		11.54	1.12	0.08	4.48	8.45
11.66	0.94	-1	3.51	8.87		11.28	1.53	0.76	2.94	9.11
11.96	0.77	-1	4.66	9.39		13	-1	-1	2.83	7.97
11.52	2.56	-1	5.47	8.62		12.48	1.2	-1	4.34	8.43
11.92	1.22	-1	4.42	9.17		11.21	2.99	-1	3.91	8.69
						12.03	3.32	-1	3.66	9.17
						12.85	2.39	-1	3.25	9.67
						12.3	1.09	0.79	4.67	8.88

## Sheet: 1C
	TS603				NCH612				NCH1681				GSC923
ASAH1	33.84	31.61	38	33.82	81.79	85.32	80.82	80.58	47.49	46.42	45.8	49.21	81.26	81.29	81.33	80.46
ASAH2	1.22	3.63	2.09	3.8	7.27	8.24	8.19	9.21	6.31	7.44	7.92	2.23	2.28	2.15	0.05	1.53
ACER1	0.05	0.05	1e-06	1e-06	1e-06	1e-06	1e-06	1e-06	1e-06	1e-06	1e-06	0.06	1e-06	1e-06	1e-06	1e-06
ACER2	2.44	3.08	2.47	2.78	2.5	2.77	1.87	2.09	0.99	0.91	0.7	0.58	0.46	0.57	0.33	0.72
ACER3	5.91	6.46	7.01	6.53	9.92	9.44	9.45	10.74	3.72	5	3.46	4.08	15.09	15.79	14.68	16.3

## Sheet: 1F
Months	Low	High
99.9		0
97.4		0
99.4		0
80.1		0
74		0
54.3		0
23.2		0
97.9		0
137.2		0
135.4		0
80.1		0
134.8		0
129.3		0
78.4		0
128.3		0
127.7		0
127.6		0
125.5		0
121		0
124.3		0
121.8		0
17		0
121		0
42.6		0
119.9		0
119.5		0
91.2		0
42.2		0
41.8		0
40.8		0
37		0
36.8		0
24		0
43.6		0
76.9		1
114.1		1
98.8		1
82.6		1
59.6		1
9.3		1
82.2		1
108.5		1
115.6		1
34.5		1
		1
112.7	0
23	0
96.2	0
92	0
88.1	0
87.7	0
87.3	0
85.8	0
82.8	0
80.6	0
80.4	0
79.9	0
79.4	0
79.2	0
75.3	0
74.8	0
71.8	0
70.7	0
70.7	0
69.6	0
63.6	0
62.9	0
60.8	0
60.6	0
49.1	0
146.6	0
17.4	0
144.3	0
142.6	0
132.9	0
132.6	0
24	0
127	0
112.7	0
124.1	0
124	0
120.8	0
120.1	0
14.7	0
110.2	0
109.5	0
108.9	0
51.6	0
26.4	0
86.5	1
50.2	1

## Sheet: 2A
SABRAC (μM)	BT142															NCH612													U251												TS603
0	1	1	1	1	1	1	1	1	1	1	1	1	1	1	1	1.26667	1.18974	0.85641	0.805128	0.882051	1.08939	1.06704	1.07821	0.765363	1.024	1	1.056	0.92	1.23217	1.06026	0.852227	0.855341	1.12302	1.02676	0.970212	0.880007	0.923052	0.989825	1.05787	1.02925	1.14515	0.874704	1.09409	0.886052	1.05875	1.08012	1.03502	0.826113	1.03835
0.0625
0.125	1.027	0.968	0.902	0.874	0.979	0.891	0.909	0.883	0.82	0.812	0.853	0.744	0.693	0.633	0.551
0.25	0.842	0.821	0.85	0.692	0.795	0.646	0.798	0.621	0.592	0.425	0.738	0.762	0.747	0.821	0.494	1.01026	1.2282	0.753846	0.792308	0.779487
0.5	0.656	0.621	0.503	0.546	0.445	0.381	0.338	0.319	0.284	0.158	1.045	0.642	0.49	0.32	0.323	1.17692	1.11282	1.36923	0.664103	0.766667					0.952	0.872	0.944	0.808					1.10619	1.07657	1.37748	0.978963									1.12285	1.12048	1.16083	0.883086	1.41888
1	0.45	0.411	0.387	0.27	0.172	0.195	0.332	0.175	0.152	0.213	0.365	0.39	0.315	0.143	-0.012
1.25																1.1	1.33077	0.907692	0.561538	0.484615	0.899441	0.620112	0.631285	0.553073	0.992	0.824	0.848	0.728					1.02811	1.31757	1.21659	0.772299					0.817967	0.859574	0.8974	0.774468	1.03739	1.13234	1.20356	0.937685	1.36283
2	0.323	0.271	0.21	0.174	0.139	0.099	0.109	0.128	0.093	0.06	0.181	0.181	0.086	-0.004	-0.037
2.5																0.433333	0.676923	0.34359	0.164103	0.112821	0.597765	0.374302	0.340782	0.329609	0.816	0.768	0.744	0.672	1.26331	1.11694	0.872781	0.695889	1.19303	1.06984	1.15803	1.01531					0.867139	0.742317	0.747991	0.659102	1.07774	1.14896	1.14896	0.949555	1.30089
4	0.21	0.222	0.187	0.119	0.112	0.138	0.092	0.105	0.096	0.087	0.062	0.067	0.017	-0.079	-0.131
5																0.074359	0.074359	0.048718	-0.00256	-0.01538	0.150838	0.139665	0.083799	0.150838	0.52	0.456	0.512	0.512	1.26207	0.991124	0.95313	0.727655	1.26506	1.12908	0.966846	0.787782					0.615603	0.649645	0.592908	0.411348	1.11573	1.10623	1.08487	0.792878	1.15634
6	0.259	0.164	0.109	0.1	0.085	0.094	0.108	0.087	0.108	0.064	0.018	-0.009	-0.058	-0.161	-0.259
10																-0.01538	-0.01538	-0.01538	-0.02821	-0.00256	0.106145	0.072626	0.050279	0.128492	0.112	0.12	0.136	0.072	1.28449	1.19729	1.04656	0.90517	1.19303	1.30276	1.28189	0.977617					0.246809	0.210875	0.235461	0.17305	0.652819	0.626706	0.538872	0.524629	0.716814
12	0.142	0.137	0.099	0.068	0.061	0.093	0.07	0.076	0.041	0.03	0.04	0.035	-0.032	-0.104	-0.232
20																0.023077	0.035897	-0.00256	0.035897	-0.02821	0.162011	0.117318	0.094972	0.128492	0.112	0.04	0.04	0.048	1.05154	0.758798	0.678449	0.581283	1.05436	1.47711	1.13851	0.907607	1.08458	0.969475	0.941494	1.03307	0.038771	0.025532	0.021749	0.040662	0.106825	0.092582	0.066469	0.102077	0.165192
24	0.063	0.042	0.043	0.033	0.019	0.044	0.043	0.031	0.021	0.017	0.055	0.046	-0.01	-0.059	-0.185
48	0.019	-0.004	0.009	-0.011	-0.014	0.007	-0.003	0.004	0.002	-0.011	0.051	0.032	-0.034	-0.102	-0.148
50																					0.173184	0.195531	0.162011	0.150838	0.08	0.072	0.048	0.048	0.343351	0.248054	0.182031	0.260511	0.209525	0.33137	0.306462	0.164423	1.04197	1.24038	1.04006	0.779968	0.025532	0.014184	0.016076	0.029314	0.064095	0.021365	0.018991	0.037982	0.050147
100																					0.217877	0.206704	0.240223	0.195531	0.048	0.032	0	0.016	0.106665	0.071162	0.061819	0.062442	0.029788	0.032481	0.026422	0.020364	0.776789	0.767886	0.728458	0.544674	0.038771	0.046336	0.031206	0.061466	0.021365	0.021365	0.018991	0.021365	0.023599
200																					0.318436	0.184358	0.027933	0.184358					0.143413	0.082996	0.112893	0.09047	0.013632	0.012959	0.011612	0.008246	0.455008	0.371701	0.276312	0.302385	0.050118	0.048227	0.059574	0.010402					0.070796
[truncated: 91 more columns]

## Sheet: 2B
	Control				5μM SABRAC				10μM SABRAC				20μM SABRAC
14-0	0.498739	0.413368	0.484224	0.51302	1.44212	1.28698	1.23581	1.1987	4.16913	2.76785	2.81534	2.80545	11.7681	5.80418	6.65062	11.8003
14-1	0.00319229	0.00258799	0.00297503	0.00429599	0.00754234	0.00588034	0.00452578	0.00562817	0.0274909	0.0154202	0.0232229	0.0167195	0.152591	0.0576038	0.0887195	0.153607
16-0	4.92806	4.76185	5.16633	5.09663	12.4787	10.8929	8.24211	9.75038	36.9462	26.0698	27.6681	22.6626	119.871	55.0162	82.7374	134.112
16-1	0.109783	0.0795928	0.101097	0.108511	0.371794	0.324222	0.325063	0.310961	0.917238	0.689953	0.694489	0.657779	2.58544	1.45023	1.6517	2.59318
18-0	1.57166	1.55763	1.62536	1.66416	4.29227	3.92137	2.65744	3.77282	13.4755	9.85173	8.54169	9.21842	48.6816	21.6552	33.5833	59.0402
18-1	1.71427	1.35962	1.57998	1.87342	4.87501	4.35148	4.30274	4.04379	11.3358	7.86801	8.06478	8.36842	23.654	13.1084	17.4112	28.6829
22-1	0.315044	0.253985	0.313907	0.338865	1.17884	1.05871	0.981888	0.930957	3.09996	2.04518	2.11365	2.14216	9.02117	5.10958	5.0435	8.54449
	Control				5μM SABRAC				10μM SABRAC				20μM SABRAC
14-0	1.04483	0.865987	1.01443	1.07475	3.02118	2.69616	2.58897	2.51122	8.73413	5.79851	5.89799	5.87728	24.6537	12.1595	13.9327	24.7211
14-1	0.978382	0.793175	0.911796	1.31665	2.3116	1.80222	1.38707	1.72494	8.42548	4.72602	7.11742	5.12424	46.7666	17.6546	27.191	47.0779
16-0	0.987941	0.954619	1.03571	1.02173	2.50164	2.18372	1.65232	1.95468	7.4067	5.22627	5.5467	4.54322	24.0307	11.0292	16.5866	26.8857
16-1	1.10063	0.797956	1.01354	1.08787	3.72742	3.25048	3.25892	3.11753	9.19575	6.91711	6.96259	6.59455	25.9203	14.5393	16.5591	25.9979
18-0	0.979408	0.970669	1.01287	1.03705	2.67481	2.44368	1.65604	2.35111	8.39755	6.1393	5.32292	5.74464	30.3369	13.4948	20.9281	36.7921
18-1	1.05053	0.83319	0.96823	1.14805	2.98746	2.66664	2.63677	2.47808	6.94673	4.82161	4.94219	5.12827	14.4954	8.03299	10.6698	17.5773
22-1	1.03141	0.831509	1.02769	1.10939	3.85935	3.46605	3.21456	3.04782	10.1488	6.69563	6.91979	7.01313	29.534	16.728	16.5117	27.9734

## Sheet: 2C
Sphingolipids	Control				5 µM				10 µM				20 µM
d18-1,14-0	1.04483	0.865987	1.01443	1.07475	3.02118	2.69616	2.58897	2.51122	8.73413	5.79851	5.89799	5.87728	24.6537	12.1595	13.9327	24.7211
d18-1,14-1	0.978382	0.793175	0.911796	1.31665	2.3116	1.80222	1.38707	1.72494	8.42548	4.72602	7.11742	5.12424	46.7666	17.6546	27.191	47.0779
d18-1,16-0	0.987941	0.954619	1.03571	1.02173	2.50164	2.18372	1.65232	1.95468	7.4067	5.22627	5.5467	4.54322	24.0307	11.0292	16.5866	26.8857
d18-1,16-1	1.10063	0.797956	1.01354	1.08787	3.72742	3.25048	3.25892	3.11753	9.19575	6.91711	6.96259	6.59455	25.9203	14.5393	16.5591	25.9979
d18-1,18-0	0.979408	0.970669	1.01287	1.03705	2.67481	2.44368	1.65604	2.35111	8.39755	6.1393	5.32292	5.74464	30.3369	13.4948	20.9281	36.7921
d18-1,18-1	1.05053	0.83319	0.96823	1.14805	2.98746	2.66664	2.63677	2.47808	6.94673	4.82161	4.94219	5.12827	14.4954	8.03299	10.6698	17.5773
d18-1,22-1	1.03141	0.831509	1.02769	1.10939	3.85935	3.46605	3.21456	3.04782	10.1488	6.69563	6.91979	7.01313	29.534	16.728	16.5117	27.9734
GalCer _d18-1,14-0_p	1.038	1.176	0.452	1.334	1.402	0.974	1.024	0.784	5.696	2.924	2.556	1.701	1.331	1.724	3.265	5.756
Sulfatide C18_2OH_n	1.017	0.892	1.04	1.051	1.384	1.347	1.188	1.17	3.452	2.339	2.147	2.79	7.502	3.903	5.881	8.058
Sulfatide C20-2OH_n	0.961	0.941	1.063	1.036	0.949	0.888	0.779	0.826	1.987	1.442	1.448	1.687	6.51	2.963	5.147	6.976
Sulfatide C24-OH_p	0.698	1.305	1.019	0.978	3.263	0.663	0.583	0.728	6.592	2.248	5.599	7.415	10.33	5.263	22.717	37.245
LysoSulfatide_n	1.004	0.84	1.184	0.972	1.73	1.454	1.284	1.396	6.424	5.305	4.656	5.603	47.367	14.419	32.536	46.578
GlcCer_d18-1,14-0_n	0.977	0.952	1.026	1.045	1.503	1.384	1.284	1.216	2.806	2.221	2.026	2.369	10.096	4.662	8.531	11.085
GlcCer_d18-1,16-0_p	0.896	1.143	1.036	0.925	2.049	1.835	1.448	1.545	5.823	4.103	3.272	3.816	12.24	4.993	10.446	14.822
GlcCer_d18-1,18-0_p	0.904	1.105	0.975	1.016	2.027	1.585	1.185	1.522	7.222	5.262	4.733	4.892	14.832	6.832	13.387	20.653
GlcCer_d18-1,18-1_n	0.947	0.974	1.063	1.015	0.942	0.904	0.834	0.772	1.343	1.072	1.02	1.367	7.756	2.882	6.716	8.967
GlcN-a1-4-GlcUA-a1-2-PI-Cer_t18-1,24-0_2OH_n	0.86	1.246	0.924	0.97	0.957	1.451	1.261	0.866	2.518	2.431	1.4	3.205	23.124	6.822	10.752	15.471
KDN-a2-3Gal-b1-4Glc-b-Cer_d18-1,22-0_n	0.881	1.232	0.898	0.989	0.651	1.144	1.182	0.566	1.375	1.391	0.895	1.794	10.275	3.48	4.489	6.364
LacCer d18-1,16-0 _p	0.892	1.524	0.851	0.732	2.188	3.679	1.768	1.448	26.64	17.827	14.223	17.353	50.322	18.777	44.537	87.851
LacCer_d18-1,14-0_n	1.281	0.814	1.071	0.835	2.378	2.612	1.538	1.714	22.129	12.708	7.106	14.697	323.196	97.421	137.467	145.483
GD3_d18-1,24-1_p	1.027	0.938	0.906	1.128	0.88	1.746	0.189	0.911	2.131	1.067	0.984	4.023	3.373	3.709	0	17.344
GM2_d18-1,16-0_p	1.049	0.941	0.84	1.17	1.504	1.605	0.9	1.379	2.526	2.223	1.653	2.286	9.638	3.073	5.022	11.828
GM2_d18-1,18-0_p	0.935	0.933	0.965	1.167	1.356	1.523	0.815	1.168	4.168	2.721	2.409	2.739	9.331	3.626	6.531	12.676
GM2_d18-1,24-1_p	0.979	1.091	1.001	0.929	1.019	1.135	0.807	0.791	2.535	1.869	1.619	1.542	10.355	3.783	7.33	8.3
GM3_d18-1,18-0_p	1.015	0.714	1.22	1.052	1.939	1.615	1.16	1.842	15.72	13.028	16.171	14.378	21.908	7.042	9.225	28.854
GM3_d18-1,20-0_n	0.963	1.136	0.957	0.944	0.803	1.278	1.113	0.724	3.087	2.225	1.648	3.117	21.012	7.19	10.003	15.771
GM3_d18-1,24-1_p	1.037	0.974	1.023	0.966	1.821	1.594	1.042	1.172	8.313	4.586	5.07	4.409	14.721	0	6.853	25.874
GM4_d18-1,16-0_p	1.031	0.95	1.174	0.845	1.362	1.804	1.25	1.256	3.561	3.398	1.758	2.357	30.414	3.749	11.133	16.182
CerP_d18-1,20-0_n	1.009	0.956	1.012	1.023	1.389	1.349	1.27	1.182	2.893	2.09	2.102	2.198	11.018	5.565	9.039	12.802
CerP_d18-1,8-0_n	0.758	0.748	0.84	1.654	2.503	1.247	1.201	1.862	8.094	4.159	4.933	7.632	28.367	34.326	21.449	32.957
SM d18-1,16-0_p	0.708	1.578	0.609	1.105	1.646	2.429	1.589	1.042	5.969	6.45	1.318	4.909	11.751	12.079	19.135	49.322
SM_d16-1,18-0_p	0.787	1.458	0.716	1.04	1.427	2.037	1.802	0.858	5.722	5.958	3.079	5.021	35.251	17.984	34.268	62.213
SM_d18-1,14-0_p	1.037	1.182	1.003	0.778	1.794	2.144	1.663	1.745	12.135	10.554	8.781	9.731	132.34	53.011	103.863	169.954
SM_d18-1,16-0_n	1.022	0.844	0.948	1.186	2.695	2.121	1.894	1.988	14.74	8.823	9.487	10.028	29.986	12.933	15.813	32.445
SM_d18-1,18-1_n	1.113	1.305	0.249	1.333	0.136	1.388	1.315	0.364	4.266	1.657	1.576	0.214	33.528	15.478	18.822	42.38

## Sheet: 2D
	Control				30min				2h				4h
14-0	0.003	0.003	0.009	0.004	0.006	0.017	0.002	0.007	0.004	0.006	0.01	0.004	0.012	0.004	0.005	0.005
14-1	0.004	0.007	0.005	0.006	0.008	0.024	0.006	0.009	0.011	0.008	0.004	0.006	0.006	0.013	0.008	0.005
16-0	2.616	3.407	3.33	3.827	4.095	4.864	3.25	6.555	4.301	4.002	3.841	4.617	5.238	5.114	5.795	4.958
16-1	0.044	0.071	0.064	0.075	0.082	0.09	0.059	0.091	0.087	0.093	0.074	0.091	0.122	0.139	0.137	0.11
18-0	3.275	3.262	3.534	3.21	3.274	4.092	3.108	3.88	4.163	3.861	4.234	3.45	3.682	4.176	4.698	3.984
18-1	0.121	0.15	0.149	0.177	0.286	0.297	0.185	0.382	0.22	0.262	0.173	0.166	0.596	0.587	0.657	0.595
22-1	0.174	0.225	0.226	0.248	0.282	0.264	0.213	0.376	0.288	0.309	0.264	0.328	0.306	0.373	0.401	0.311
	Control				30min				2h				4h
14-0	0.633	0.6	1.949	0.818	1.414	3.863	0.46	1.504	0.972	1.311	2.202	0.972	2.64	0.966	1.158	1.114
14-1	0.735	1.271	0.919	1.074	1.43	4.375	1.088	1.723	1.931	1.483	0.814	1.119	1.064	2.342	1.416	0.862
16-0	0.794	1.034	1.011	1.161	1.243	1.476	0.986	1.989	1.305	1.214	1.166	1.401	1.59	1.552	1.759	1.505
16-1	0.688	1.12	1.004	1.188	1.301	1.415	0.936	1.439	1.371	1.463	1.173	1.441	1.92	2.197	2.165	1.745
18-0	0.986	0.983	1.064	0.967	0.986	1.233	0.936	1.168	1.254	1.163	1.275	1.039	1.109	1.258	1.415	1.2
18-1	0.813	1.004	1.001	1.183	1.919	1.99	1.238	2.56	1.472	1.753	1.156	1.114	3.99	3.934	4.402	3.987
22-1	0.797	1.032	1.036	1.135	1.293	1.208	0.975	1.72	1.319	1.413	1.21	1.504	1.402	1.708	1.834	1.422

## Sheet: 2F
	EV				KO
14-0	0.274	0.276	0.589	0.317	0.687	0.489	0.348	0.599
14-1	0.002	0.002	0.002	0.002	0.003	0.001	0.002	0.002
16-0	2.807	2.872	3.121	3.339	7.814	5.183	4.492	5.926
16-1	0.049	0.042	0.055	0.04	0.109	0.096	0.053	0.088
18-0	1.235	1.316	1.378	1.529	3.675	2.981	2.333	3.375
18-1	0.126	0.068	0.09	0.078	0.215	0.15	0.072	0.127
22-1	0.25	0.193	0.208	0.192	0.356	0.31	0.296	0.313
	EV				KO
14-0	0.7519	0.7583	1.6193	0.8705	1.8874	1.3429	0.9558	1.6468
14-1	0.836045	0.994392	1	1.16956	1.60657	0.783487	1.09454	1.01881
16-0	0.925	0.9465	1.0283	1.1003	2.5747	1.7079	1.4803	1.9528
16-1	1.045	0.9126	1.1885	0.8539	2.3422	2.0677	1.1395	1.8812
18-0	0.9049	0.9647	1.0099	1.1205	2.6931	2.1844	1.7093	2.4728
18-1	1.3897	0.7519	0.996	0.8623	2.375	1.6534	0.7925	1.4071
22-1	1.1857	0.9151	0.9882	0.9111	1.6878	1.4714	1.4057	1.4851

## Sheet: 2G
	Control																								SABRAC (10 μM)
0	0.9775	0.9469	0.9784	0.9718	1.0007	1.0222	1.0525	1.0501	0.9722	1.062	1.0291	0.9887	0.9846	0.9664	0.9641	1.0328	0.9923	0.9847	1.0193	1.029	0.9877	0.997	1.0018	0.9883	0.9196	0.9539	0.9841	1.0062	0.961	1.0359	1.0894	1.05	0.9533	1.0343	0.9681	1.0796	1.0412	0.9862	1.0272	0.91	0.987	0.9916	1.0041	0.9882	1.0034	1.0055	1.0026	1.0177
10	0.983	0.9615	0.9788	0.9848	1.0138	1.0343	1.012	1.0318	1.0135	1.0998	1.0372	0.9904	0.9582	0.9306	0.9363	1.0341	0.991	0.9793	1.0276	1.0295	0.9933	0.9895	1.0025	0.9873	0.9206	0.9507	1.0024	1.0018	0.9678	1.0338	1.0802	1.1132	0.9742	0.9733	0.9712	1.0514	0.97	0.9478	0.9745	1.0216	0.9919	0.9906	1.0031	0.9878	1.0059	0.998	0.9976	1.0191
20	0.9742	0.9667	1.0059	0.9861	1.0066	1.0248	1.0045	1.0312	1.0503	1.0007	1.0026	1.0074	0.9826	0.968	1.0123	0.9762	0.9908	0.9794	1.022	1.0225	0.9931	0.9995	1.0062	0.9865	0.9248	0.9576	1.0022	0.9776	0.9771	1.0407	1.1063	1.0913	0.9895	1.0306	1.0258	1.0361	0.9693	1.0371	1.0807	1.0881	0.9916	0.9846	1.0009	0.9924	0.9961	1.0004	0.9956	1.0155
30	0.9817	0.9622	0.986	0.985		1.0279	1.0172	1.04	0.9854	1.1112	1.0254	0.9797	0.9819	0.9239	1.0133	0.9791	0.989	0.9806	1.0253	1.0211	0.9897	0.9958	1.0129	0.9855	0.9471	0.9542	1.0199	1.0266	0.9778	1.0498	1.1338	1.1191	1.0161	1.0119	0.985	1.0248	0.9268	0.974	0.9917	1.0343	0.9907	0.9887	1.001	0.9902	1.0021	0.9974	0.9945	1.0183
40	1.0093	0.9525	0.9703	0.9735	1.0256	1.0314	0.9977	1.0398	1.0571	1.1264	0.9376	0.9761	0.9654	0.9241	0.9917	1.0216	0.9908	0.9799	1.0212	1.0222	0.9912	1.002	1.0063	0.9863	0.9401	0.9463	1.0099	1.0275	0.969	1.0421	1.1055	1.1194	1.1009	1.021	0.9273	1.018	0.9486	0.9576	1.006	1.0389	0.994	0.9917	1.0038	0.9884	0.9987	1.0014	0.9971	1.0211
50	1.0064	0.9564	0.9779	0.9778	1.0146	1.0178	0.9916	1.0575	1.0581	1.1102	0.9776	0.9965	0.9727	0.9486	0.9543	0.982	0.9953	0.9787	1.0264	1.0273	0.9884	0.9971	1.0017	0.985	0.9358	0.9446	1.0098	1.0215	0.9677	1.0406	1.1355	1.1552	1.211	0.9453	0.9187	1.0871	1.0357	0.9347	1.012	0.9899	0.9921	0.9954	1.0063	0.9879	1.0027	1.0054	0.9954	1.0211
60	1.0181	0.9669	0.97	0.9842	0.9966	1.0304	0.9974	1.0365	1.091	1.0356	1.0112	0.9904	0.9564	0.9167	0.9944	1.0041	0.9982	0.98	1.0204	1.0239	0.9901	0.9886	1.0099	0.9888	0.9421	0.9892	1.0137	1.0235	0.9677	1.04	1.1458	1.1292	1.0699	0.9811	1.0107	1.0113	1.0515	0.9328	0.962	1.0989	0.9863	0.9856	1.0045	0.9966	1.014	1.0121	0.9971	1.0275
70	1.01	0.9695	0.9797	0.9848	1.0064	1.016	1.0068	1.0268	1.1049	0.9789	1.0092	0.9692	0.9524	0.965	1.0064	1.0139	0.9982	0.9831	1.0214	1.0232	0.9925	0.9864	1.0011	0.994	0.9546	0.9959	1.0374	1.0663	0.9659	1.0362	1.1772	1.1484	1.1331	1.0155	0.9581	1.1187	1.0167	0.9652	1.0776	0.981	1.0151	1.0007	1.0107	1.0014	1.0395	1.0062	1.0009	1.0255
80	1.0178	0.9602	0.9818	0.9797	1.004	1.025	1.0037	1.0278	1.0176	1.0069	1.0163	0.9811	0.9641	0.9325	1.0513	1.0301	0.9949	0.9836	1.0159	1.0208	0.9945	0.9855	1.0135	0.9912	0.9313	1.014	1.0349	1.0627	0.9615	1.0415	1.1618	1.166	1.0762	1.0293	0.9465	1.3584	1.0578	1.0283	1.0272	1.1834	1.0035	1.0019	1.0049	1.001	1.0423	1.012	0.9919	1.0275
90	1.0195	0.9798	0.9749	0.9877	0.996	1.0148	0.9963	1.0309	0.9992	1.0052	0.9733	0.9485	0.9914	0.9878	0.9957	1.0987	0.9954	0.9834	1.0187	1.0122	0.9942	0.9977	1.0043	0.9941	0.9336	0.974	1.0218	1.0439	0.9674	1.0306	1.223	1.2454	1.1697	1.0561	0.9599	1.1911	1.059	0.9797	1.0011	1.0469	1.0093	0.9976	1.0214	1.0013	1.057	1.0228	1.0051	1.0353
100	1.0136	0.9709	0.9878	0.9853	1.0002	1.0144	1.0028	1.0251	1.0668	1.0051	0.9881	0.9593	0.9437	1.0142	0.9698	1.0528	0.9951	0.9836	1.0133	1.0033	0.9931	1.0052	1.0147	0.9917	0.9537	1.0173	1.0238	1.0886	0.9627	1.0244	1.1923	1.1775	1.094	1.0411	0.8821	1.1723	0.976	1.1081	1.1425	1.0394	1.0103	0.9972	1.0261	0.9969	1.0531	1.0244	1.0118	1.0472
110	1.0192	0.9676	0.9764	0.9795	0.996	1.0368	1.004	1.0204	1.0383	0.9576	1.0359	0.9529	1.0163	0.9716	1.0066	1.0208	0.9932	0.9801	1.0161	0.9961	0.9877	0.9934	1.0417	0.9918	0.9771	1.0172	1.0239	1.0847	0.956	1.0234	1.2293	1.1796	0.9546	1.0962	0.9182	1.3832	0.8934	1.1285	1.1571	1.1312	0.998	0.9915	1.0131	1.0058	1.1089	1.017	1.0127	1.0515
120	1.0542	0.966	0.9787	0.974	0.987	1.0307	0.9902	1.0193	1.0757	0.9878	1.0084	0.9269	0.9614	0.9811	0.9767	1.0821	0.9993	0.99	1.0165	1.0007	1.0005	0.9993	0.9944	0.9992	0.9724	1.0134	1.0307	1.1141	0.9483	1.0215	1.2371	1.1979	1.0395	0.9912	0.9071	1.2195	1.001	1.0591	1.1068	0.9589	1.0115	1.0038	1.0146	1.0101	1.1219	1.0574	1.0202	1.0773
130	1.0352	0.9659	0.9727	0.9848	0.9879	1.0368	0.9863	1.0304	1.061	1.0124	0.9923	0.9742	0.9986	0.9506	0.9921	1.0188	1.0009	0.9869	1.0169	1	0.9949	1.0003	1.0015	0.9985	0.962	1.0018	1.0345	1.1232	0.9458	1.0116	1.2523	1.1954	1.0791	1.0328	0.8992	1.1987	1.0551	1.1196	1.0823	1.0887	1.0099	1.0064	1.021	1.0128	1.2041	1.0922	1.0519	1.0879
140	1.0383	0.961	0.9698	0.9926	0.9886	1.0239	1.007	1.0189	0.9619	1.0618	0.951	1.0159	1.0237	0.9601	0.982	1.0436	1.0071	0.9858	1.011	0.9947	1.0004	1.0123	0.9916	0.997	0.9834	1.0278	1.0508	1.0964	0.9375	1.0083	1.2117	1.2085	1.2221	1.0522	0.9749	1.2543	1.0141	1.0977	1.2137	0.9339	1.0188	1.0114	1.0117	1.0181	1.1373	1.0989	1.0542	1.0889
150	1.0663	0.9572	0.9696	0.9871	0.984	1.0239	0.9814	1.0304	1.0717	1.0207	0.9611	0.9839	1.0066	0.9061	0.9798	1.0702	1.0074	0.9871	1.0144	1.0038	0.9993	1.0005	0.9903	0.9973	0.986	1.0257	1.0713	1.1109	0.9411	1.0069	1.2885	1.2375	1.3152	1.0381	0.8984	1.2471	0.9675	1.1192	1.1517	0.9071	1.0227	1.0093	1.0111	1.0235	1.2103	1.1132	1.0844	1.1036
160	1.0266	0.9717	0.9715	1.0067	0.9842	1.036	0.9831	1.0203	1.0423	1.059	0.9365	0.951	0.9536	1.0434	0.9825	1.0318	1.0028	0.9903	1.0154	0.9982	1.0087	0.9936	0.9918	0.9992	0.9818	1.0573	1.0728	1.108	0.9446	0.9945	1.26	1.2323	1.1692	1.0769	0.8881	1.1332	0.984	1.1174	1.1248	0.9866	1.0177	1.0103	1.0191	1.0242	1.197	1.1424	1.0462	1.0939
170	1.0348	0.963	0.9769	0.9885	0.9926	1.0185	0.9915	1.0343	1.0326	0.9761	0.9514	0.9736	0.9731	1.054	1.0162	1.023	0.9966	0.9934	1.0097	0.999	1.0093	0.9971	0.9926	1.0023	0.9937	1.0621	1.0855	1.1227	0.9563	0.985	1.2708	1.2355	0.9793	1.0064	0.8843	1.2984	1.1004	1.12	1.3281	0.897	1.0228	1.0332	1.0293	1.0238	1.2383	1.1003	1.0838	1.1691
180	1.0227	0.9691	0.9733	0.9906	0.998	1.0314	0.9973	1.0177	1.0922	0.9891	0.9401	0.9828	1.0027	0.9187	0.9532	1.1212	0.9949	0.9902	1.0026	0.9911	0.9996	0.9901	1.0366	0.995	1.0241	1.0901	1.0826	1.1666	0.9582	0.9845	1.2951	1.2561	1.0804	1.0063	0.9167	1.24	0.9346	1.1095	1.3527	0.9208	1.04	1.0285	1.0346	1.0336	1.1454	1.1409	1.1644	1.1547
190	1.0477	0.9677	0.9779	0.9785	0.9889	1.0245	0.9896	1.025	1.0035	1.0317	0.9606	0.9311	1.029	0.9427	0.9852	1.1162	0.9943	0.9882	1.0041	0.9967	0.9983	0.9945	1.0251	0.9987	1.0215	1.0877	1.0732	1.1516	0.961	0.9758	1.3293	1.2922	1.1817	1.044	0.9454	1.218	0.9317	1.0772	1.1915	1.0309	1.0296	1.0383	1.0276	1.0413	1.2049	1.2584	1.1819	1.0898
200	1.0349	0.9646	0.972	0.9809	0.974	1.0243	0.9891	1.0602	1.0285	1.0102	0.9619	0.9694	0.9904	0.9567	0.9928	1.0901	1.0016	0.9953	1.0069	1.0017	0.9985	0.9925	0.9968	1.0068	1.0278	1.0605	1.0727	1.147	0.9674	0.9708	1.341	1.3052	1.102	1.2028	0.912	1.2759	0.9245	0.9622	1.2456	0.9008	1.013	1.0874	1.0579	1.0527	1.1894	1.2387	1.1648	1.1906
210	1.0577	0.9696	0.9773	0.9713	0.9784	1.0161	0.9975	1.0322	1.093	0.9916	0.9605	0.9526	0.9874	0.9401	0.9928	1.082	0.995	0.9921	0.9988	0.9925	0.9989	1.0136	1.009	1.0001	1.0324	1.0984	1.0848	1.1695	0.9572	0.9786	1.3484	1.3073	1.3597	1.0771	0.9094	1.1207	1.0153	0.9435	1.5462	1.1409	1.034	1.0854	1.0409	1.0435	1.1983	1.1839	1.1347	1.1618
220	1.0507	0.9689	0.9694	0.973	0.9829	0.9973	0.9961	1.0617	1.0724	1.0075	0.9493	0.9564	1.0147	0.9572	0.9705	1.0721	1.0044	0.9971	1.0045	0.9917	1.0107	0.9887		1.0029	1.0522	1.0936	1.0839	1.176	0.954	0.9749	1.344	1.3691	1.1269	1.0105	0.9051	1.1394	0.8972	0.9409	1.2388	0.8929	1.0365	1.1335	1.1165	1.0639	1.1733	1.1961	1.1109	1.1081
230	1.0409	0.9918	0.9808	0.9888	0.971	0.9898	1.0253	1.0116	1.0117	1.0107	0.9413	0.9394	1.0107	0.982	0.9739	1.1302	1.001	0.9955	1.0026	0.9973	1.0198	0.9814		1.0024	1.0697	1.1043	1.0947	1.1732	0.9689	0.9798	1.3476	1.389	1.3833	1.0069	0.9092	1.1354	0.9569	0.8873	1.3413	0.9403	1.085	1.1306	1.0683	1.0919	0.9697	1.2599	1.2946	1.2031
240	1.0447	0.9994	0.9673	0.9668	0.9788	1.0023	0.9924	1.0483	1.043	1.025	0.9488	0.9539	1.0197	0.9879	0.9467	1.0751	0.9956	0.9873	1.0209	0.9877	1.0269	0.9825		0.9991	1.097	1.106	1.0695	1.1863	0.9676	0.9786	1.3934	1.4161	1.2903	1.0278	0.8842	1.4402	0.9848	0.8954	1.538	0.8887	1.0422	1.2398	1.0779	1.0997	1.1944	1.224	1.1164	1.2135
250	1.0473	1.0106	0.9968	0.9785	0.9677	0.9945	1.0106	0.9939	1.0258	0.999	0.9357	0.9661	1.011	1.0134	0.9939	1.055	0.9945	0.9871	1.0239	0.9952	1.0322	0.9693		0.9979	1.1151	1.1406	1.0806	1.2299	0.9584	0.9798	1.3902	1.4584	1.4009	1.059	0.8975	1.4228	1.1093	0.898	1.5231	0.8771	1.0575	1.1884	1.1291	1.1651	1.1555	1.2617	1.2255	1.2404
260	1.095	1.0205	0.97	0.9598	0.9663	1.0112	0.9833	0.994	1.0671	1.0115	0.9792	0.9478	1.0168	0.9209	0.9908	1.0658	0.9997	0.9876	1.0099	0.9891	1.0295	0.9743		1.0099	1.1343	1.1627	1.0892	1.2179	0.959	0.9762	1.4066	1.5385	1.0989	1.1223	0.9134	1.0836	1.2916	0.9066	1.5074		1.0849	1.2695	1.1208	1.1625	1.2441	1.2539	1.3205	1.2528
270	1.0389	1.013	0.9613	0.9599	0.9653	1.0023	0.9991	1.0601	1.0289	0.9935	0.953	0.9344	1.0062	1.0109	0.978	1.0952	0.9983	0.9837	1.0328	0.9972	1.0353	0.9703	0.9883	0.994	1.1188	1.1586	1.0725	1.246	0.9545	0.9842	1.4485	1.5446	1.0519	1.0503	0.9334	1.3654		0.9104	1.2401	1.6298	1.0403	1.4277	1.161	1.0886	1.1967	1.2149	1.2418	1.0939
280	1.0565	1.0417	0.964	0.972	0.9691	1.0124	0.9982	0.9861	1.0531	0.9844	0.9563	0.953	1.0557	0.9817	0.9738	1.0422	0.9845	0.9851	1.0193	1.0004	1.034	1.0342	0.9547	0.9879	1.1386	1.1867	1.1174	1.2677	0.9592	1.0001	1.4389	1.6543	1.1502	1.2097	0.9228	1.3914	0.942	0.9453	1.2402		1.0808	1.3014	1.1492	1.11	1.1363	1.238	1.2822	1.2608
290	1.061	1.02	0.9572	0.9957	0.9599	1.0059	1.0046	0.9957	1.0881	0.9725	0.9564	0.9719	0.9975	0.9196	0.9901	1.1038	0.9882	0.986	1.0198	0.9925	1.0298			0.9837	1.1518	1.2037	1.0971	1.2662	0.9518	0.9717	1.508	1.6324	1.0879	1.4258	0.9384	1.3931	1.2163	0.9591	1.2207		1.0501	1.4618	1.0049	1.2154	1.1465	1.1548	1.3288	1.2593
300	1.0883	1.0306	0.9675	0.9498	0.9583	0.9938		1.0118	1.0447	0.9903	0.9727	0.968	1.0233	0.9343	1.0052	1.0616	0.9867	0.9895	1.0162	0.9957	1.0339	0.973		1.0049	1.1852	1.2014	1.1284	1.3439	0.9343	1.0184	1.5111	1.6172	1.4317	1.3491	0.9729		1.2699	0.9338	1.5687		1.0878	1.2579	1.0029	1.2192	1.1825	1.2146	1.3747	1.2443
310	1.0983	1.0175	0.9558	0.9578	0.9673	1.0091	0.9958	0.9984	1.0869	0.9805	0.9488	0.9551	1.0997	0.9391	1.0058	0.984	0.9883	0.9795	1.0226	0.9767	1.0303			1.0025	1.1631	1.2029	1.1565	1.286	0.9502	1.0274	1.606	1.7464	1.5012	1.4384	0.9585	1.3654	1.1609	0.9751	1.352	1.3202	1.0289	1.4593	1.3372	1.1299	1.2067	1.2058	1.4933	1.2369
320	1.0904	1.0312	0.9517	0.9729	0.9599	0.978	1.0006	1.0154	1.0981	0.9428	0.931	0.9739	1.0494	0.9329	1.0498	1.022	0.982	0.9826	1.0302	0.99	1.052	0.9631		1	1.1965	1.2231	1.1843	1.3443	0.9789	1.016	1.5471	1.7172	1.3893	1.3737	0.9183	1.281	0.7901	0.9328	1.3114		1.0603	1.2741	1.2839	1.1843	1.2278	1.3125	1.6994	1.1964
330	1.0768	1.0276	0.9403	0.9525	0.9688	1.0039	1.0125	1.0176	1.0234	0.9785	0.988	0.965	1.1434	0.9307	0.9657	1.0052	0.9812	0.9772	1.013	1.0058	1.0264	0.964		1.0324	1.2653	1.2064	1.183	1.3198	0.9379	1.0219	1.578	1.7466	1.2863	1.3732	0.9834	1.1082		0.9692	1.4848	1.6566	1.0838	1.5852	1.1634	1.214	1.2087	1.3869	1.6839	1.231
340	1.0478	1.0959	0.929	0.9651	0.925	0.985	1.0245	1.0277	1.008	0.9356	1.0788	0.9655	1.0968	0.9638	0.9704	0.9811	0.9896	0.9692	0.9949	0.9821	1.0585			1.0057	1.217	1.1955	1.2357	1.3158	0.9133	1.009	1.5576	1.7637	1.3819	1.3933	0.9519	1.2848		0.972	1.4286		1.1961	1.2702	1.0132	1.1253	1.2094	1.3106	1.7244	1.2453
350	1.0895	1.008	0.9331	0.9713	0.9666	0.9787	0.9975	1.0554	0.9509	0.9277	0.9671	0.9227	1.0769	1.2113	0.984	0.9595	0.9788	0.9629	0.9856	0.9552	1.0655			1.052	1.2852	1.2392	1.2096	1.3597	0.9451	1.0204	1.5521	1.7482	1.28	1.3304	0.9804		1.0684	0.915	1.4363		1.1655	1.3025	1.6092	1.0983	1.1725	1.2369	1.8991	1.1423
360	1.0616	1.0198	0.939	0.9874	0.9571	1.016	1.0094	1.0097	1.0037	0.9446	0.9919	0.9682	1.077	1.0193	0.982	1.0134	0.9849	0.9652	0.9873	0.9584	1.0992	0.9787		1.0264	1.3084	1.2749	1.2795	1.4415	0.9744	1.034	1.6809	1.7901	1.0019	1.3765	0.9727			0.9266	1.471		1.1873	1.3714	1.6283	1.1568	1.2393	1.2152	1.5871	1.1792
370	1.0512	0.9981	0.9308	0.9798	0.9599	1.0396	1.0219	1.0187	1.0578	0.9253	1.0302	0.9589	1.0898	0.9548	0.9843	0.9988	0.976	0.9592	0.9864	0.9844	1.0872			1.0068	1.3697	1.2812	1.2766	1.3292	0.9952	1.0519	1.6083	1.8588	1.3532	1.3615	1.0315	1.3105		1.0165	1.4722		1.1631	1.4498	1.2246	1.1003	1.2912	1.2321	1.5664	1.3204
380	1.0211	1.0084	0.9498	0.9922	0.9627	1.0112	1.0521	1.0025	1.0434	0.9503	1.0047	0.9556	1.0848	0.9616	0.9915	1.0081	0.9308	0.9425	0.9768	1.0082	1.1187			1.0231	1.2824	1.252	1.3134	1.45	0.9931	1.0494	1.585	1.8358	1.3919	1.3717	0.9562			0.9439	1.4795		1.4038	1.3166	1.3252	1.4817	1.1719	1.2065	1.5393	1.2985
390	1.0297	1.0062	0.9259	0.9901	1.0094	1.0225	1.0259	0.9903	0.9983	0.9651	1.0257	0.9664	1.1262	0.92	0.9952	1.003	0.9521	0.9363	0.9611	0.9624	1.1643			1.0239	1.3172	1.2582	1.3076	1.4642	1.0586	1.1009	1.6259	1.8471	1.3111	1.3724	1.0765	1.3472		0.9923	1.4847		1.3094	1.3875	1.289	1.1134	1.1635	1.3129	1.6153	1.3016
400	1.1591	1.0197	0.9703	0.9632	0.9242	0.9864	0.9861	0.9911	1.0027	0.9635	0.9529	0.9849	1.1217	0.9619	1.0087	1.0037	0.9931	0.9571		0.9951	1.1106	0.9536		0.9905	1.3128	1.3069	1.3134	1.5027	1.0241	1.0872	1.6633	1.8827	1.3424	1.3664	1.0595	1.3033		0.9571	1.441		1.3604	1.2853	1.3846	1.1874	1.2353	1.2352	1.7689	1.3008
410	1.0409	1.0241	0.9446	0.9943	0.9427	1.0468		1.0066	1.0086	0.9865	0.9866	0.9683	1.132	0.9112	1.028	0.9788	0.9786	0.9567	0.9782	0.9839	1.0908			1.0119	1.364	1.4133	1.3313	1.4511	1.054	1.1057	1.6579	2.0237			0.8898			0.9987	1.4277		1.3622	1.3628	1.4729	1.3736	1.2927	1.1952	1.8009	1.3342
420	1.0598	1.0099	0.9642	0.9699	0.9646	1.0023	1.0263	1.0028	1.0145	0.961	0.9447	0.9606	1.1641	0.9431	1.0304	0.9817	0.9737	0.9597	0.9814	0.9816	1.0763			1.0274	1.3593	1.3558	1.3769	1.52	1.0201	1.1802	1.6719	1.9537	1.3908	1.3442	0.9294			1.0561	1.4872		1.4203	1.3512	1.5447		1.272	1.2695	1.612	1.2386
430	1.0861	1.0398	0.9491	0.9737	0.9717	0.9962	1.0111	0.9723	1.0073	0.9682	1.0261	0.9845	1.0734	0.9478	1.0324	0.9605	0.9749	0.9433	0.9669	0.9657	1.1209			1.0282	1.4317	1.3731	1.3858	1.5733	1.087		1.6661	2.0347	1.5412	1.3996				1.0389	1.4637		1.4332	1.1347	1.7489	1.2918	1.176	1.2846	1.6431	1.2671
440	1.0658	1.007	0.9968	0.9676	0.983	0.9928	0.9988	0.9883	0.9927	0.9688	1.0133	0.9703	1.09	0.9737	1.0099	0.9813		0.9413	0.9865	0.9384	1.127			1.0068	1.4195	1.3792	1.4129	1.5956	1.0852		1.7012	2.0756		1.3433	1.0773	1.384		1.0191	1.4455		1.4173	1.4568	1.5369	1.2807	1.327	1.2354	1.6658	1.2634
450	1.0874	1.0074	0.9663	0.9587	0.9759	0.9829	1.0531	0.9682	0.981	0.995	1.0445	0.9972	1.0814	0.9173	0.9955	0.9881	0.9689	0.9389	0.9647	0.974	1.1387			1.0148	1.4503	1.4217	1.4273	1.5687	1.1225		1.7815	2.0491	1.2704	1.4064				1.0201	1.4666		1.3658	1.3042	1.5129	1.4686	1.3038	1.3454	1.8537	1.2645
460	1.1018	1.0095	0.9659	0.9368	0.9841	1.0256	1.0395	0.9368	1.0278	0.9619	1.0154	0.996	1.0848	0.9293	1.0112	0.9736		0.9417	0.9797	0.9889	1.1101			0.9796	1.3933	1.4564	1.5136	1.5107	1.117		1.7419	2.1498		1.3522				1.0419	1.4344		1.2355	1.3202	1.3904	1.3528	1.3538	1.456	1.6708	1.2457
470	1.1396	0.9855	0.9638	0.9799	0.9812	0.9548	0.9995	0.9958	1.001	0.9835	0.9948	1.0153	1.0741	0.9311	1.023	0.9772		0.9411	0.9762	0.9704	1.1285			0.9837	1.5203	1.5331	1.7293	1.6222			1.7581	2.0647	1.2737	1.3285	1.0919			1.0276	1.4363		1.6058	1.3911	2.0782	1.3493	1.3269	1.3465	1.7547	1.3624
480		0.9847	0.974	0.9698	1.0201	0.9871	1.005	1.0593	0.9787	0.9707	1.0111	1.0062	1.0297	0.983	1.0296	0.9911		0.9424		0.9585	1.0939			1.0053	1.6087	1.622	1.6764	1.7118	1.1182		1.8778	2.1407				1.3622		1.0438	1.4382		1.2619	1.2857	1.9327	1.5107	1.2612	1.364	1.5257	1.4267
490		0.9924	0.983	0.9447	1.0274	0.9959	1.0191	1.0377	0.9909	0.9584	1.0477	1.0067	1.0115	0.9471	1.0716	0.966		0.9432		0.9948	1.1242		0.9199	1.0179	1.4811	1.5981	1.5813	1.6635			1.7613	2.3161	1.2479	1.3088				1.1104	1.4136		1.4525	1.3365	2.0094	1.3133	1.24	1.1838	1.8014	1.338
500		0.9801	0.9932	0.9665	1.0618	0.9591	1.0233	1.0158	0.974	0.9556	1.0062	1.0063	1.1103	0.9243	1.041	0.9823	0.952	0.9492		0.9708	1.1483			0.9797	1.6159	1.6774	1.6681	1.7251			1.862	2.2101	1.2876	1.3326				1.2356	1.3985		1.4542	1.2497	1.7669	1.341	1.2253	1.3716	1.4143	1.3597
510		0.9917	0.9834	0.9789	1.0243	0.9786	1.0207	1.0223	0.9884	0.9864	1.0124	0.9846	1.0401	0.9592	0.9754	1.0534	0.9654	0.9526		0.9343	1.1249			1.0228	1.601	1.7143	1.645	1.75			1.8039	2.2996	1.3915					1.3483	1.4157		1.5587	1.3716	1.7553	1.3805	1.1856	1.2345	1.9397	1.3654
520		1.009	0.9977	0.9945	0.9829	0.9811	1.0029	1.0319	1.0036	0.9928	0.9907	1.0415	1.0463	0.9381	1.0227	0.9644		0.9113		0.8991	1.161			1.0286	1.5939	1.6561	1.7324	1.9107			1.8997	2.3423	1.3056	1.3637				1.3525	1.4184		1.4184	1.1332	1.9647	1.2799	1.1956	1.3395	1.9393	1.4074
530		1.0089	1.0055	0.9942	1.0278	0.9727	0.9909		0.9914	0.9756	1.0408	1.0129	0.999	0.9495	1.0084	1.0224				0.8804	1.1818			0.9378	1.6816	1.7611	1.8334	1.8459		1.2526	1.9159	2.3449	1.3042	1.337				1.3622	1.4179		1.2737	1.2685	1.4609	1.2531	1.0543	1.1187	1.9687	1.2986
540		1.0357	0.9771	0.9992	0.9962	0.9866	1.0053		0.9796	1.0107	1.0281	1.0384	1.0147	0.9532	1.0177	0.9578	0.9291	0.9486		0.9429	1.1668			1.0126	1.6621	1.7068	1.911	1.9543			1.9948	2.4016		1.3764				1.3628	1.4542		1.6615	1.2214	1.8411	1.3071	1.4212	1.2661	1.4868	1.3585
550		1.0159	0.9598	1.0088	0.9801	0.9612	1.0422	1.032	1.0216	0.9822	1.0007	1.0178	1.032	0.9695	1.0308	0.9454	0.9204	0.9281		0.9514	1.1988			1.0013	1.6225	1.7995	1.7697	1.9037			2.0079	2.3994	1.26	1.3275				1.4053	1.4104		1.4254	1.2443	1.6991	1.2125	1.2243	1.2574	2.4426	1.361
560		1.055	0.9416	1.0328	0.9902	0.9629	0.9746	1.0431	0.9925	0.9604	1.0061	0.9931	1.0251	1.0511	1.006	0.9656	0.9166	0.9183		0.9048	1.2459			1.0144	1.7151	1.8987	1.8091	2.0052			2.0477	2.4129	1.2041	1.3				1.3682	1.4003		1.6161	1.5	1.7357	1.332	1.1794	1.2488	2.2304	1.4166
570		1.0229	0.9536	0.944	1.0002	0.9488	1.0052	1.1253	0.9744	0.9686	0.979	1.0082	1.0069	0.9955	1.0813	0.9861	0.9861	0.9791		0.9703				1.0645	1.7	1.8716	1.8898	2.0757			1.9416	2.4303	1.4919	1.313	1.1134			1.3189	1.3386		1.4939	1.3858	1.848	1.3694	1.3374	1.4009	1.6196	1.3401

## Sheet: 2H
	Control																								SABRAC (10 μM)
0	0.8787	0.9636	1.0125	0.9738	1.025	1.0504	1.0246	1.0715	1.022	1.026	0.9896		1.0301	0.952	0.9568	1.0234	0.9198	0.9395	1.0441	1.0452	0.9696	1.0238	1.1037	0.9544	0.9772	0.9268	0.9896	1.0521	0.9645	1.0299	0.9816	1.0784	1.0188	1.0039	0.947	1.0335	1.0097	1.0123	1.0577	0.9172	0.9351	0.9973	0.984	0.9451	1.0127	1.026	1.0338	1.0658
10	0.8785	0.9562	1.0026	0.978	1.0387	1.056	1.0228	1.0672	1.0308	1.0365	1.0014		1.0003	0.9488	0.9622	1.02	0.9451	0.9329	1.0395	1.0426	0.984	1.0277	1.0936	0.9345	0.9654	0.9277	1.0074	1.0445	0.9571	1.0509	0.9792	1.2258	0.9958	0.9825	0.9564	0.9892	0.9774	1.0032	1.0295	0.9056	0.9595	0.971	0.9642	0.9622	1.0036	1.0235	1.0177	1.0516
20	0.8751	0.9902	0.9916	0.9687	1.0195	1.0732	1.0257	1.0561	1.0328	1.0292	1.0195		1.0015	0.9339	0.9799	1.0032	0.9908	0.929	1.0713	1.0215	0.9587	1.0089	1.0856	0.9343	0.9662	0.9283	1.0305	1.0147	0.9973	1.0536	1.0014	1.1501	1.0048	0.9876	0.9504	0.9964	0.9616	0.9928	1.0076	0.925	0.9358	0.9633	0.9571	0.9507	0.98	1.0244	1.0159	1.0579
30	0.8925	0.9584	1.0004	0.9648	1.0393	1.0663	1.0189	1.0594	1.0442	1.0296	1.0278		1.009	0.9406	0.9558	0.9931	0.9625	0.9291	1.0527	1.0264	0.9889	1.0381	1.0642	0.938	0.9616	0.9333	0.9557	1.0535	0.9697	1.0223	0.9645	1.1836	1.0062	0.9782	0.9602	0.9544	0.9614	0.9978	1.0187	0.9241	0.9417	0.9855	0.9454	0.942	0.9988	1.0185	1.0053	1.0771
40	0.8892	0.94	0.9864	0.9539	1.0356	1.0612	1.0372	1.0966	1.0455	1.0202	1.0242		0.9942	0.9146	0.9764	1.0248	0.9494	0.9358	1.0402	1.0334	0.9805	1.0156	1.0965	0.9486	0.9813	0.9319	0.9848	1.0586	0.9742	1.0144	0.9491	1.1433	0.9465	1.0007	0.9412	0.9406	0.9413	0.9834	1.0654	0.9237	0.9761	1.0077	1.002	0.9254	0.9768	1.0457	1.0563	1.1044
50	0.8799	0.966	1.0001	0.9773	0.9999	1.041	1.0243	1.1115	1.0471	1.0242	1.0119	1.0035	1.0026	0.923	0.9596	1.0281	1.0167	0.9253	0.9967	1.0393	0.9487	1.0494	1.0935	0.9305	0.9729	0.9355	0.9707	1.0283	0.9676	0.9849	0.9858	1.0729	0.9789	0.9779	0.9413	0.9711	0.9768	0.9884	1.0037	0.9301	0.9422	1.0196	0.9477	0.9238	0.9861	1.044	1.0052	1.0884
60	0.8954	0.9409	0.9694	0.993	1.0175	1.0719	1.0212	1.0908	1.0283	1.019	1.0288	1.004	1.0073	0.9258	0.9657	1.0211	1.0128	0.9217	0.9755	1.0265	0.9853	0.9577	1.1566	0.9639	0.9729	0.9603	0.9742	1.0448	0.9827	1.0067	0.9745	1.0797	0.9971	0.9729	0.9576	0.9705	0.9486	1.003	1.0378	0.9486	0.9717	0.9855	0.9364	0.9539	1.0696	1.0736	1.0466	1.0736
70	0.8921	0.947	1.0002	0.996	0.9961	1.0451	1.0659	1.0576	1.0334	1.0149	1.0152	0.9805	1.0174	0.9349	0.9837	1.02	1.0126	0.9401	1.0006	1.055	0.9953	0.9297	1.0978	0.9691	1.0126	0.9545	0.9695	1.0528	0.9438	1.0153	1.0092	1.1645	1.0051	1.0071	0.9438	0.979	0.9662	0.9785	0.996	0.9374	1.0061	1.0121	0.9869	0.97	1.1212	1.0783	1.0101	1.1312
80	0.8989	0.9632	1.003	0.9875	1.0071	1.0486	1.0242	1.0675	1.0353	1.0187	1.0171	0.9811	1.0242	0.9145	0.9838	1.0252	1.0141	0.9495	1.0453	1.049	1.0265	0.9185	1.028	0.9692	0.9443	0.9647	0.9552	1.0415	0.9548	1.0143	1.0073	1.1176	1.016	1.0241	0.9274	0.9991	0.9351	0.9961	0.9976	0.9841	0.9637	1.0752	0.9391	0.9666	1.0734	1.0767	1.0175	1.171
90	0.9144	0.9835	0.9899	0.9805	1.0082	1.0387	1.0216	1.0632	1.0297	0.9938	1.0233	0.995	1.007	0.947	0.9711	1.0331	0.9976	0.9681	1.0182	1.0553	1.0158	0.959	0.9987	0.9872	0.9682	0.9598	0.9391	1.0917	0.9833	1.0286	1.2766	1.1856	0.9511	1.0154	0.9328	1.0016	0.9294	0.9774	1.026	0.9801	0.9626	1.0252	0.9558	0.9797	1.5912	1.1465	1.0506	1.224
100	0.9202	0.9864	1.0127	0.9738	0.984	1.0414	1.0152	1.0663	1.0269	1.0108	1.0098	0.9851	1.0169	0.9468	0.9813	1.0225	1.0206	0.9233	0.9369	0.9622	1.0217	1.0354	1.1427	0.9572	0.9675	1.0064	0.9913	1.1216	1.0057	0.9928	0.9867	1.1415	0.9641	1.0461	0.9339	1.0019	0.937	1.0071	1.0378	1.0121	0.9199	0.9899	0.9605	0.9303	1.3753	1.1247	0.9987	1.2257
110	0.9184	0.9967	1.0219	0.9636	0.9682	1.0595	1.0077	1.0641	1.0366	1.0078	1.0098	0.9866	1.0143	0.9401	0.9894	1.0155	1.0595	0.9387	0.966	0.9658	1.041	1.0502		0.9788	0.9947	0.9845	0.9596	1.089	0.9601	0.9892	1.2509	1.2005	0.9659	1.0347	0.9508	1.0598	0.9174	1.0281	1.0075	1.0005	0.9311	0.9913	1.0013	0.9533	1.3774	1.0596	1.0117	1.2657
120	0.9308	0.9849	0.9754	0.9883	0.9912	1.0389	1.0192	1.0713	1.0442	1.0177	0.993	0.9842	1.0158	0.9399	0.9817	1.0234	1.1098	0.9344	0.9626	0.9904	1.0528	0.9269	1.0459	0.9771	1.016	0.9868	0.9656	1.0583	0.9737	0.9966	1.0452	1.1306	0.9951	0.9717	0.9563	1.0892	0.9257	1.0144	1.0357	0.9215	0.951	1.0176	0.897	0.9845	1.4822		1.0648	1.3008
130	0.942	0.9858	0.9775	0.9747	0.9955	1.0462	1.0125	1.0658	1.0283	1.031	0.9988	0.9904	0.9998	0.9564	0.97	1.0254	1.0943	0.9232	0.9501	0.9683	1.0241	0.9729	1.0776	0.9896	1.0276	0.9545	0.9609	1.0977	0.9652	0.9844	1.0141	1.1776	1.018	0.9723	0.9481	1.0713	0.9324	0.9864	1.0203	0.9191	0.9717	1.0961	0.9576	0.9755	1.3809		1.0401	1.3717
140	0.9161	0.9635	1.0046	0.9739	0.9892	1.0697	1.011	1.072	1.0029	1.046	0.979	1.0069	0.9998	0.961	0.9726	1.0318	1.0677	0.9285	0.9586	0.996	1.02	1.0021	1.0062	1.0209	1.0311	0.9904	0.9945	1.1167	0.9725	0.9915	1.0169	1.1637	1.037	0.9848	0.9465	1.0523	0.9168	1.019	0.9787	0.8981	1.0214	1.0808	0.9247	0.9808	1.3644		1.1181	1.4127
150	0.9406	0.9625	0.9949	0.9772	1.0054	1.0631	0.9838	1.0723	1.0204	1.0439	0.9884	0.9911	0.9991	0.9503	0.9671	1.0398	1.0875	0.9123	0.9234	0.9605	1.011	1.083	1.0885	0.9339	0.9996	0.9853	0.9529	1.0801	0.9596	0.9505	0.9781	1.2593	1.0784	0.9843	0.9237	1.2638	0.9463	0.9963	1.0012	0.8962	1.0347	0.894	0.9108	0.9511	1.2931			1.3303
160	0.9343	0.9374	1.0265	0.9745	1.0109	1.0385	1.0004	1.0775	1.0217	1.0405	0.9926	1.0001	0.9935	0.966	0.9707	1.0149	1.0416	0.9299	0.9304	0.9737	1.0241	1.0341	1.0706	0.9957	1.018	0.9703	0.9759	1.0873	0.9939	0.9724	1.0286	1.2766	0.9913	0.9841	0.9108	1.1252	0.8911	1.0141	1.0465	0.894	0.9854	1.0468	0.9431	0.9122			1.0949	1.4741
170	0.9014	0.9747	1.0076	0.9569	1.0248	1.0391	0.9708	1.1247	1.0001	1.0089	0.9911	0.9881	1.0081	0.956	0.9962	1.0515	0.9603	0.968	0.9432	0.9947	1.0392	0.9826	1.0968	1.0154	1.0283	0.9874	0.9195	1.0566	0.9251	0.9543	1.007	1.1918	0.978	0.9968	0.9284	1.1677	0.9458	1.0265	1.0714	0.9053	1.0184	1.2002		1.0009	1.3879	0.9496		1.4954
180	0.8934	0.9615	0.9831	0.9484	1.0309	1.0505	0.9958	1.1364	1.01	1.0278	0.9824	0.9926	1.0041	0.9477	0.9755	1.0598	0.951	0.9936	0.9687	0.9664	0.9983	0.9833	1.1052	1.0336	0.9999	1.0127	0.9583	1.161	0.9393	0.9444	0.9763	1.2656	0.9768	0.975	0.9363	1.3119	0.9097	1.0039	1.0053	0.9174	1.0667	1.0981	1.1372	0.9719		1.07	1.2127	1.4383
190	0.8967	0.9705	1.02	1.0036	1.002	1.0387	0.9987	1.0698	1.0113	1.0393	1.0006	0.9761	1.0119	0.9434	0.9957	1.0215	0.9271	0.9607	0.9254	1.0337	1.001	1.0308	1.0935	1.0277	1.0487	1.0173	0.9391	1.0937	0.9384	0.9338	1.0486	1.2277	1.0253	1.0096	0.9376	1.248	0.9757	0.9316	1.1019	0.9081	1.0571	1.329	1.0161	0.984		0.9565	1.1109	1.3876
200	0.9184	0.9772	0.9973	0.9827	0.9768	1.0544	0.9969	1.0964	1.021	1.0065	1.0029	0.9738	1.0123	0.9683	0.9978	1.0174	0.9528	0.9927	0.9102	0.9663	0.9926	0.9216	1.1892	1.0745	1.0118	0.9928	0.8632	1.1133	0.9597	0.9537	1.0496	1.3787	0.9966	1.0558	0.9368	1.3107	0.9364	0.8997	1.1037	0.9515	1.0859	1.3717	1.0633	1.029		1.0022	1.1162	1.4076
210	0.9262	1.0176	1.0125	0.9795	0.9945	1.0309	0.9575	1.0812	1.039	0.9858	0.9677	0.9824	1.0239	0.9723	0.9919	1.037	0.9553	0.9966	0.9484	1.0202	0.9686	1.0939		1.0171	1.0522	0.9886	0.8742	1.1172	0.9302	0.9246	0.9888	1.154	0.9629	1.0255	0.9086	1.2142	0.9484	0.8791	1.1546	0.9324	1.0786	1.3961	0.9963	1.0105	1.4803	1.0132		1.6442
220	0.975	0.9983	1.0159	1.0131	0.962	1.0326	0.9428	1.0603	1.0056	0.997	1.0056	0.9972	1.0108	0.9422	0.9964	1.0451	0.9838	1.0075	0.9583	1.0001	1.045			1.0054	1.0617	1.013	0.8475	1.1272	0.976	0.9514	1.3417	1.3293	0.9397	1.0176	0.9028	1.0761	0.8946	0.8949	1.1578	0.8996	1.1345	1.3749	1.1727	1.0918		1.035		1.3858
230	0.9384	1.0175	1.0446	1.0017	0.976	1.0164	0.936	1.0694	1.0029	1.0143	1.0029	0.983	1.0172	0.9777	0.9733	1.0288		0.9894	0.9269	1.0053	1.081			0.9974	1.0537	0.9921	0.8309	1.124	0.9149	0.9054	1.1862	1.4587	1.5612	1.0348	0.9164	0.8937	1.0438	0.8893	1.1414	0.8926		1.3628		1.1336		0.987		1.1607
240	0.9515	0.9711	1.0357	0.9578	0.9926	1.0118	0.9857	1.0937	0.993	1.0301	1.0167	1.0018	1.0356	0.9461	0.9698	1.0068	0.9238	0.9768	0.9726	1.0027	1.1026			1.0216	1.0239	1.0471	0.9488	1.1487	1.0754	0.9069	1.0347	1.4634	1.5017	1.0256	0.9384	0.9718	0.9849	0.9111	1.3539	0.8936		1.2792	1.0331	1.1122	1.4611	1.0131	1.1559	1.55
250	0.9345	0.9764	0.9883	1.0508	0.9874	1.0392	0.9702	1.0531	1.009	1.0007	1.002	1.0094	1.018	0.9842	0.9663	1.0104	0.9043	0.9803	0.9462	1.0575	1.0786			1.0332	1.0429	1.0753	0.8861	1.2175	0.9417	0.9023	1.0966	1.4782	1.6245	1.0434	0.9177	0.9225	0.9674	0.9072	1.1329	0.8934		1.4653	0.9583	0.8884	1.461	0.9958		1.5865
260	0.9328	0.9884	1	0.998	0.947	1.0547	0.9653	1.1138	1.0066	1.0067	1.0123	0.9991	1.0181	0.9642	0.9706	1.0223	0.9125	0.9859	1.0046	1.0112	1.1003			0.9855	1.0403	1.0684	0.8675	1.238	0.9518	0.8947	1.0446	1.4632	1.2422	1.1216	0.9238	0.9835	1.0155	0.9125	1.2488	0.9437		1.5442	1.0235	0.8906	1.3767	1.0057	1.0222	1.4501
270	0.9251	1.0134	1.0167	0.9761	0.9801	1.0378	0.9942	1.0566	1.0025	1.0123	0.9912	0.9943	1.0185	0.9848	0.9675	1.0289	0.9368	0.9831	0.9531	0.981	1.173			0.9731	1.0054	1.0703	1.0963	1.2296	0.9963	0.8872	1.2574	1.3883	1.1069	1.0793	0.972		0.9841	0.9398	1.2966		1.1609	1.6388	1.0552		1.4575	1.0113		1.6582
280	0.9531	1.0204	1.0244	0.9423	0.9614	1.0798	0.9939	1.0247	1.007	1.0036	0.9883	0.9866	1.0437	0.9854	0.9701	1.0154	0.9295	0.9854		0.9758	1.1102			0.9991	1.1005	1.1529	1.4358	1.3512	0.9538	0.9277	1.1745	1.3721	1.2197	1.2417	0.9367		0.9283	0.9493	1.4175	0.8547	1.0365		1.0445			1.0007		1.7657
290	0.9286	0.9883	1.0321	0.9419	0.9653	1.0446	1.0022	1.0969	1.0036	0.9783	1.0018	0.9969	1.0219	0.9726	0.9727	1.0523	0.9416	1.015	0.9733	0.9927	1.0935			0.9838	1.1276	1.2745	1.3448	1.3199	0.9654	0.9246	1.2281	1.2586	1.2112	1.3195	0.9526		1.2416	0.9499	1.2121	0.8728			1.0795		1.383	1.0262		1.8053
300	0.9387	0.9765	0.9948	0.9399	1.0005	1.1111	0.9271	1.1113	1.0129	1.0043	0.982	0.9946	1.0102	0.9758	0.9968	1.0234	0.9418	1.0226		0.959	1.0964			0.9802	1.1633	1.446	1.4446	1.2075	0.9324	0.9704	1.1934	1.2788	1.2137	1.3638	0.9611		1.2565	0.9595	1.5624		0.977		1.0026			1.0179		1.7557
310	0.9368	0.9462	1.0334	0.9209	0.9464	1.0694	1.0025	1.1443	1.0045	0.9924	1.0092	0.9967	1.0331	0.9578	1.0023	1.004	0.9285	0.9923		0.9884	1.1293			0.9616	1.0498	1.3044	1.6494	1.255	0.9611	0.9138	1.2114	1.2535	1.5162	1.3841	0.94		1.2489	0.9623	1.27						1.5223	1.0197		1.7625
320	0.9213	0.9998	1.0121	0.937	0.9557	1.0305	1.0053	1.1382	1.0147	0.9683	1.0059	1.0057	1.0337	0.9354	1.0264	1.0099		0.9714	0.9882	0.9681	1.1178			0.9544	1.2099	1.2702	1.5389		0.9418	0.9413	1.2208	1.2599	1.685	1.4517	0.9323	0.8443		0.9809	1.3935				1.0003			1.0047		1.7927
330	0.8865	0.9972	1.0387	0.9537	0.9878	1.0938	0.9678	1.0745	0.9937	0.9781	1.0193	1.0223	1.0305	0.9423	1.0232	0.9906		0.9854		0.9563	1.0907			0.9677	1.3409	1.4417	1.6403	1.3394	1.0963	0.9842	1.4821	1.3225	1.4999	1.4522	0.9492	0.8694		1.0051	1.5466							1.0001		1.452
340	0.9592	0.9551	1.0178	0.9398	0.9632	1.0988	0.9799	1.0861	0.9742	0.9602	1.0408	0.9922	1.0409	0.9664	1.0377	0.9875		0.9438			1.1021			0.9541	1.3151	1.2542			0.9637	0.8697	1.9021	1.2541	1.4664	1.4769	0.9693	0.9334		0.9962	1.4679				1.0181			0.9857		1.6457
350		0.9811	0.9577	0.9552	1.0535	1.031	0.9844	1.0372	0.975	0.9738	1.0345	0.9967	1.0149	0.9916	1.0544	0.9591		0.9358			1.1294			0.9348	1.2845	1.597	1.4015		0.9959	0.8841	1.2179	1.2875	1.5099	1.4426	1.0528	0.852	1.112	0.9638	1.4822				0.9862	0.9043		0.9599		1.5744
360	0.9143	0.9393	1.0162	0.9587	1.009	1.0676	1.0202	1.0747	1.0007	0.9572	1.0159	0.9896	1.02	0.9695	1.0578	0.9893		0.9343		0.9752	1.1606			0.9299	1.2923	1.3448			1.022	0.857	1.8756	1.3727	1.275	1.456	0.9637	0.8699		0.9899	1.491				1.0441	0.919		0.9995		1.6999
370	0.9273	0.9991	0.9452	0.9665	0.9646	1.0947	0.9959	1.1067	1.0066	0.9472	1.0014	0.9831	1.0165	0.9657	1.0822	0.9974		1.0006		0.9047	1.1858			0.9088	1.3473	1.451	1.3852	1.0829	1.1853	0.9886	1.4159	1.2524	1.5845	1.4503	1.0389	1.3539		1.0195	1.5009				0.9907	0.8765		0.9828		1.6432
380		0.9485	0.9907	0.959	0.9705	1.0966	1.066	0.9686	1.0002	0.9679	0.9999	0.9861	1.0252	0.9693	1.0537	0.9975		0.8721			1.2161			0.9118	1.3272	1.3897	1.3537		1.0761	0.894	1.4107	1.3703	1.5318	1.4776	0.9594			0.9944	1.4964				1.0049	0.8571		0.9414		1.5905
390	0.8706	0.9348	0.9423	0.9761	1.0382	0.9598	1.1573	1.1209	0.9761	0.9473	1.0008	0.981	1.0603	0.9465	1.0854	1.0025		0.9178		0.9317	1.2384			0.9121	1.194	1.4576	1.7162		1.0253	0.9264	1.3887	1.0532	1.4732	1.4775	0.9612		1.0711	0.9959	1.5072				0.9035			0.9565		1.5848
400	0.8794	0.9223	1.0188	0.9646	0.9735	0.9707	1.2009	1.0699	0.9692	0.9597	0.9878	1.0107	1.0611	0.9434	1.0833	0.9847		0.924		0.9464	1.1983			0.9313	1.3318	1.4595	1.3899		1.1429	1.0335	1.4179	1.0948	1.48	1.4288	0.9784			1.0093	1.5322							1.0078		1.6685
410		0.9188	0.926	0.9512	0.9828	0.9135	1.139	1.1687	0.9759	0.9675	1.002	0.9725	1.0692	0.9411	1.1063	0.9655		0.9263	0.9154		1.2118			0.9465	1.2725	1.5729	1.3199		1.0095	0.9844	1.3471	1.0585			0.8946			0.9915	1.4635				0.9689			1.0027		1.5882
420		1.0164	0.9427	0.9348	1.0475	0.9091	1.0617	1.0878	0.9809	0.9584	0.9744	0.978	1.0763	0.9527	1.1084	0.9709		0.9163		0.9136	1.2338			0.9363	1.2742				1.0161	0.9528	1.3617	1.0892	1.5037	1.3704	0.9727	0.8443		1.0544	1.4765							1.0069		1.5957
430		0.9659	0.9794	0.9731	1.0943	0.9128		1.0744	0.9676	0.9513	0.992	0.9877	1.0526	0.9329	1.1422	0.9736		0.9574	0.9638		1.1619			0.917	1.2681	1.3978	1.5275	1.2406			1.3597	1.2373	1.634	1.4538	1.105			1.0861	1.4929				0.9478			0.9814		1.6003
440		0.9378	0.9731	0.9643	1.0332	0.9751	0.9965	1.12	0.9643	0.956	1.0002	0.9661	1.0993	0.952	1.0817	0.9804		0.9227		0.9273	1.2178			0.9321	1.2927		1.379				1.3669	1.2508	1.5425	1.4049	1.0836	1.5243		1.037	1.5105							1.0019		1.5586
450	0.9667	0.9535	0.9618	0.9554	1.0418	0.9889	1.0042	1.1278	0.9532	0.983	0.9984	0.9987	1.0581	0.9614	1.0847	0.9626		0.9383			1.1354			0.9263	1.3064	1.7561	1.3516	1.1747	1.1842		1.3529	1.2443	1.4601	1.4462	1.1155			1.0178	1.4767							0.9996		1.6026
460		0.9978	0.9681	0.9604	1.071	0.96	0.9704	1.0725	0.9611	0.979	0.9842	0.9973	1.0546	0.9457	1.1146	0.9634		0.9419		0.9043	1.23			0.9238	1.2542		1.4718			0.9662	1.374	1.2175	1.5292	1.4064	1.0834			1.0069	1.5034				1.004			1.0205		1.6387
470	0.9122	0.9394	1.1037	0.9365	1.1103	0.9088	1.008	1.0809	0.9456	0.9899	1.0031	1.0074	1.0557	0.9501	1.0791	0.9691		0.942		0.954	1.1643			0.9397	1.2724	1.3493	1.2421			1.0572	1.3327	1.2035	1.3932	1.3818	1.1108			1.0686	1.4789							1.0162		1.6933
480		0.8977		0.9101	1.1029	0.8883	0.9907	1.2102	0.9564	0.9721	0.9933	0.9833	1.0806	0.9923	1.0637	0.9583		0.9456		0.9647	1.1574			0.9323	1.1747	1.2145	1.3681			0.9139	1.3151	1.1232	1.5021	1.4941	0.9717			1.0971	1.4676							1.0245		1.6858
490		0.9252		0.9084	1.1242	0.9297	0.9901	1.1225	0.977	0.9626	0.9978	1.0044	1.0514	0.9401	1.0946	0.9721		0.9292		1.0094	1.1354			0.9259	1.2132	1.2153	1.2847				1.281	1.1745	1.2722	1.4238	1.0882			1.1714	1.4813							0.9832		1.6055
500		0.9467	0.9108	0.9694	1.1011	0.9346	1.024	1.1135	0.9391	0.9838	0.997	1.002	1.1287	0.9344	1.0352	0.9798		0.9536			1.156			0.8904	1.2636		1.2659				1.318	1.2394	1.3896	1.3934	1.1344			1.2246	1.4808							1.0013		1.3782
510		0.8477	1.0322	0.9158	1.1009	0.9503	0.9946	1.1586	0.9709	0.9723	0.9877	0.9998	1.0454	1.0254	1.0123	0.9862		0.9385		0.887	1.2363			0.9382	1.2177	1.1875	1.2574	1.3626			1.3176	1.2373	1.4843	1.4749	1.0914			1.3162	1.4967							1.0174		1.6643
520		0.8694	1.138	0.9465	1.0233	0.9537	0.9881	1.0809	0.9951	0.9826	0.9691	1.0335	1.0504	0.9762	1.0366	0.9565		0.916		0.9178	1.2107			0.9554	1.2173	0.7742	1.2307				1.2507	1.1807	1.4184	1.4686	1.1032			1.3714	1.3713							0.9917		1.6643
530		0.9357		0.9609	1.0732	0.8931	1.0361	1.1009	0.9818	0.969	1.0152	1.0157	1.0569	0.9315	1.0026	1.0272				0.8246	1.2296			0.9458	1.2548	1.1262	1.2725				1.3397	1.1989	1.4635	1.4148	1.1353	0.9516		1.3393	1.354							0.9191
540		1.0002	1.0904	0.93	1.041	0.9153	1.0231		0.9676	0.9856	0.9887	1.0217	1.0319	0.9833	1.067	0.9542					1				1.2008		1.2238	1.0731			1.3082	1.0324		1.4418	1.0931	0.9589		1.3251	1.5005							0.8209		1.2186
550		0.8634	1.189	0.9726	1.0662	0.9044	1.0045		1.0076	0.9714	0.9846	1.0115	1.0791	0.9845	1.0116	0.9498	0.9823							1.0177	1.219	1.5817	1.4289	1.1227			1.3256	1.0539	1.2649	1.3195	1.094			1.3451	1.4799							1.1634
560		0.9476	1.0461	0.9198	1.0434	0.9132	0.9575	1.1724	0.9865	0.9609	0.9875	1.0192	1.0412	1.0057	1.0361	0.9629	0.8756			0.9126	1.2118				1.188	1.272	1.2437	1.0456			1.2979	1.1428	1.3576	1.3085	1.1058			1.3785	1.3509							1.0156		1.6135
570		0.9927		0.9631	1.0983	0.9065	0.9422	1.0973	0.9744	0.9686	0.979	1.0082	1.0069	0.9955	1.0813	0.9861	0.899	0.9556		0.9106	1.267			0.9678	1.2078	1.6194	1.2412	0.9925			1.3087	1.2231	1.4792	1.3019	1.104			1.3078	1.3273							1.057

[truncated: 20 more sheets: 2J, 3B, 3F, 3H, 3I, 4A, 4B, 4C, 4D, S6, S7, S8, S10, S12, S13, S14, S15, S19, S25, S26]
